# Supplementary material for: Distinguishing the associations between daily mortality and hospital admissions and nitrogen dioxide from those of particulate matter: a systematic review and meta-analysis
Source: PubMed Central journal article supplement — BMJ Open. 2016 Jul 21;6(7):e010751. doi: 10.1136/bmjopen-2015-010751 (PMC4964176; doi:10.1136/bmjopen-2015-010751), 2016-07-21
Supplement: bmjopen-2015-010751supp.pdf [file bmjopen-2015-010751supp.pdf]

# **Distinguishing the associations between daily mortality and hospital admissions and nitrogen dioxide from those of particulate matter: a systematic review and meta-analysis.**

IC Mills, RW Atkinson, HR Anderson, RL Maynard, DP Strachan

## **Online Supplementary Material**

### **Contents list**

- 1. Literature search criteria**
- 2. List of countries by WHO region and mortality strata**
- 3. Metrics of particulate matter (PM) used in the two-pollutant model analyses**
- 4. List of tables**

Table S1: Meta-analysis results for all-cause mortality in all-ages associated with a 10  $\mu\text{g}/\text{m}^3$  increase in 24 hour  $\text{NO}_2$

Table S2: Meta-analysis results for all-cause mortality in all-ages associated with a 10  $\mu\text{g}/\text{m}^3$  increase in 1 hour  $\text{NO}_2$

Table S3: Meta-analysis results for all cardiovascular mortality in all-ages associated with a 10  $\mu\text{g}/\text{m}^3$  increase in 24 hour  $\text{NO}_2$

Table S4: Meta-analysis results for all respiratory mortality in all-ages associated with a 10  $\mu\text{g}/\text{m}^3$  increase in 24 hour  $\text{NO}_2$

Table S5: Meta-analysis results for stroke mortality in all-ages associated with a 10  $\mu\text{g}/\text{m}^3$  increase in 24 hour  $\text{NO}_2$

Table S6: Meta-analysis results for all-cause mortality in all-ages associated with a 10  $\mu\text{g}/\text{m}^3$  increase in metrics of Particulate Matter (PM) - estimates adjusted for 24 hour  $\text{NO}_2$

Table S7: Meta-analysis results for all cardiovascular mortality in all-ages associated with a 10  $\mu\text{g}/\text{m}^3$  increase in metrics of Particulate Matter (PM) - estimates adjusted for 24 hour  $\text{NO}_2$

Table S8: Meta-analysis results for all respiratory mortality in all-ages associated with a 10  $\mu\text{g}/\text{m}^3$  increase in metrics of Particulate Matter (PM) - estimates adjusted for 24 hour  $\text{NO}_2$

## 5. List of figures

Figure S1: Studies and two-pollutant model estimates selected for meta-analysis for all-cause mortality, all ages, 24 hour NO<sub>2</sub>

Figure S2: All available studies providing two-pollutant model estimates for meta-analysis for all-cause mortality, all ages, 1 hour NO<sub>2</sub>

Figure S3: All available studies providing two-pollutant model estimates for meta-analysis for all cardiovascular mortality, all ages, 24 hour NO<sub>2</sub>

Figure S4: All available studies providing two-pollutant model estimates for meta-analysis for all cardiovascular mortality, all ages, 1 hour NO<sub>2</sub>

Figure S5: All available studies providing two-pollutant model estimates for meta-analysis for all respiratory mortality, all ages, 24 hour NO<sub>2</sub>

Figure S6: All available studies providing two-pollutant model estimates for meta-analysis for stroke mortality, all ages, 24 hour NO<sub>2</sub>

Figure S7: All available studies providing two-pollutant model estimates for meta-analysis for cardiac mortality, all ages, 24 hour NO<sub>2</sub>

Figure S8: All available studies providing two-pollutant model estimates for meta-analysis for COPD (including asthma), Lower Respiratory Infections (LRI), ischaemic heart disease (IHD), dysrhythmia (DYS) mortality, all ages, 24 hour NO<sub>2</sub>

Figure S9: Studies and two-pollutant model estimates selected for meta-analysis for all cardiovascular mortality, all ages, 24 hour NO<sub>2</sub>

Figure S10: Studies and two-pollutant model estimates selected for meta-analysis for all respiratory mortality, all ages, 24 hour NO<sub>2</sub>

Figure S11: All studies providing two-pollutant model estimates for all-cause mortality, all-ages, ultrafine particles (UFP) adjusted for 24 hour NO<sub>2</sub>

Figure S12: All studies providing two-pollutant model estimates for all cardiovascular mortality, all-ages, PM adjusted for 24 hour NO<sub>2</sub>

Figure S13: All studies providing two-pollutant model estimates for all respiratory mortality, all-ages, PM adjusted for 24 hour NO<sub>2</sub>

Figure S14: Studies providing two-pollutant model estimates for meta-analysis for all respiratory hospital admissions, various age groups, 24 hour NO<sub>2</sub>

Figure S15: Studies providing two-pollutant model estimates for meta-analysis for all respiratory hospital admissions, various age groups, 1 hour NO<sub>2</sub>

Figure S16: Studies providing two-pollutant model estimates for meta-analysis for hospital admissions for asthma, children, 24 hour NO<sub>2</sub>

Figure S17: Studies providing two-pollutant model estimates for meta-analysis for hospital admissions for asthma, various age groups, 24 hour NO<sub>2</sub>

Figure S18: Studies providing two-pollutant model estimates for meta-analysis for hospital admissions for cardiac disease, all-ages, 24 hour NO<sub>2</sub>

Figure S19: Studies providing two-pollutant model estimates for meta-analysis for hospital admissions for cardiac disease, elderly, 24 hour NO<sub>2</sub>

Figure S20: All available studies providing estimates from both single-pollutant and season-specific models for 24 hour NO<sub>2</sub> and all-cause mortality in all-ages

Figure S21: All available studies providing estimates from both single and season-specific models for 24 hour NO<sub>2</sub> and all cardiovascular mortality in all ages

Figure S22: All available studies providing estimates from both single-pollutant and season-specific models for 24 hour NO<sub>2</sub> and all respiratory mortality in all-ages

Figure S23: All available studies providing estimates from both single-pollutant and season-specific models for 24 hour NO<sub>2</sub> and all respiratory and all cardiovascular hospital admissions in all-ages

Figure S24: Ranking of NO<sub>2</sub> estimates for all-cause mortality in all-ages by mean levels of 24 hour NO<sub>2</sub> (multi-city studies shown using black bars)

Figure S25: Ranking of NO<sub>2</sub> estimates for all-cause mortality in all-ages by mean levels of PM<sub>10</sub> (multi-city studies shown using black bars)

Figure S26: Ranking of NO<sub>2</sub> estimates for all-cause mortality in all-ages by the NO<sub>2</sub>/PM<sub>10</sub> concentration ratio (multi-city studies shown using black bars)

Figure S27: Ranking of NO<sub>2</sub> estimates for all-cause mortality in all-ages by daily mean temperature (multi-city studies shown using black bars)

## **6. List of references included in the review**

## **7. Appendix 1 – Update literature search and commentary**

## Literature search criteria

Bibliographic databases were searched to identify peer-reviewed time-series (and case crossover) studies of the relationship between daily concentrations of NO<sub>2</sub> and daily mortality or hospital admissions.

Bibliographic databases searched: PubMed, EMBASE or Web of Science (which includes the Science Citation Index).

The search terms used are shown below and minor refinements were made for use in each bibliographic database.

(air pollution OR pollution OR nitric oxide\* OR nitrogen dioxide?) AND (timeseries OR time series OR time-series OR daily OR case-crossover) AND (mortality OR death\* OR dying OR hospital admission\* OR admission\* OR emergency room OR visit\* OR attendance\* OR 'a&e' OR 'a and e' OR accident and emergency OR general pract\* OR physician\* OR consultation\* OR emergency department\*)

No restriction on language was applied. The bibliographic databases were searched for peer-reviewed papers published up to May 2011.

## List of countries by WHO Region and mortality strata

Reproduced from The World Health Report 2002 (<http://www.who.int/whr/2002/en/>, accessed 7<sup>th</sup> February 2015)

### African Region

Algeria — AFR-D  
Angola — AFR-D  
Benin — AFR-D  
Botswana — AFR-E  
Burkina Faso — AFR-D  
Burundi — AFR-E  
Cameroon — AFR-D  
Cape Verde — AFR-D  
Central African Republic — AFR-E  
Chad — AFR-D  
Comoros — AFR-D  
Congo — AFR-E  
Côte d'Ivoire — AFR-E  
Democratic Republic of the Congo — AFR-E  
Equatorial Guinea — AFR-D  
Eritrea — AFR-E  
Ethiopia — AFR-E  
Gabon — AFR-D  
Gambia — AFR-D  
Ghana — AFR-D  
Guinea — AFR-D  
Guinea-Bissau — AFR-D  
Kenya — AFR-E  
Lesotho — AFR-E  
Liberia — AFR-D  
Madagascar — AFR-D  
Malawi — AFR-E  
Mali — AFR-D  
Mauritania — AFR-D  
Mauritius — AFR-D  
Mozambique — AFR-E  
Namibia — AFR-E  
Niger — AFR-D  
Nigeria — AFR-D  
Rwanda — AFR-E  
Sao Tome and Principe — AFR-D  
Senegal — AFR-D  
Seychelles — AFR-D  
Sierra Leone — AFR-D  
South Africa — AFR-E  
Swaziland — AFR-E  
Togo — AFR-D  
Uganda — AFR-E  
United Republic of Tanzania — AFR-E  
Zambia — AFR-E  
Zimbabwe — AFR-E

### Region of the Americas

Antigua and Barbuda — AMR-B  
Argentina — AMR-B  
Bahamas — AMR-B  
Barbados — AMR-B  
Belize — AMR-B  
Bolivia — AMR-D  
Brazil — AMR-B  
Canada — AMR-A  
Chile — AMR-B  
Colombia — AMR-B  
Costa Rica — AMR-B  
Cuba — AMR-A  
Dominica — AMR-B  
Dominican Republic — AMR-B  
Ecuador — AMR-D  
El Salvador — AMR-B  
Grenada — AMR-B  
Guatemala — AMR-D  
Guyana — AMR-B  
Haiti — AMR-D  
Honduras — AMR-B  
Jamaica — AMR-B  
Mexico — AMR-B  
Nicaragua — AMR-D  
Panama — AMR-B  
Paraguay — AMR-B  
Peru — AMR-D  
Saint Kitts and Nevis — AMR-B  
Saint Lucia — AMR-B  
Saint Vincent and the  
Grenadines — AMR-B  
Suriname — AMR-B  
Trinidad and Tobago — AMR-B  
United States of America — AMR-A  
Uruguay — AMR-B  
Venezuela, Bolivarian  
Republic of — AMR-B

### Eastern Mediterranean Region

Afghanistan — EMR-D  
Bahrain — EMR-B  
Cyprus — EMR-B  
Djibouti — EMR-D  
Egypt — EMR-D  
Iran, Islamic Republic of — EMR-B  
Iraq — EMR-D  
Jordan — EMR-B  
Kuwait — EMR-B  
Lebanon — EMR-B  
Libyan Arab Jamahiriya — EMR-B  
Morocco — EMR-D  
Oman — EMR-B  
Pakistan — EMR-D  
Qatar — EMR-B  
Saudi Arabia — EMR-B  
Somalia — EMR-D  
Sudan — EMR-D  
Syrian Arab Republic — EMR-B  
Tunisia — EMR-B  
United Arab Emirates — EMR-B  
Yemen — EMR-D

### Mortality strata

A. Very low child, very low adult  
B. Low child, low adult  
C. Low child, high adult  
D. High child, high adult  
E. High child, very high adult

## European Region

**Albania** – EUR-B  
**Andorra** – EUR-A  
**Armenia** – EUR-B  
**Austria** – EUR-A  
**Azerbaijan** – EUR-B  
**Belarus** – EUR-C  
**Belgium** – EUR-A  
**Bosnia and Herzegovina** – EUR-B  
**Bulgaria** – EUR-B  
**Croatia** – EUR-A  
**Czech Republic** – EUR-A  
**Denmark** – EUR-A  
**Estonia** – EUR-C  
**Finland** – EUR-A  
**France** – EUR-A  
**Georgia** – EUR-B  
**Germany** – EUR-A  
**Greece** – EUR-A  
**Hungary** – EUR-C  
**Iceland** – EUR-A  
**Ireland** – EUR-A  
**Israel** – EUR-A  
**Italy** – EUR-A  
**Kazakhstan** – EUR-C  
**Kyrgyzstan** – EUR-B  
**Latvia** – EUR-C  
**Lithuania** – EUR-C  
**Luxembourg** – EUR-A  
**Malta** – EUR-A  
**Monaco** – EUR-A  
**Netherlands** – EUR-A  
**Norway** – EUR-A  
**Poland** – EUR-B  
**Portugal** – EUR-A  
**Republic of Moldova** – EUR-C  
**Romania** – EUR-B  
**Russian Federation** – EUR-C  
**San Marino** – EUR-A  
**Slovakia** – EUR-B  
**Slovenia** – EUR-A  
**Spain** – EUR-A  
**Sweden** – EUR-A  
**Switzerland** – EUR-A  
**Tajikistan** – EUR-B  
**The former Yugoslav  
Republic of Macedonia** – EUR-B  
**Turkey** – EUR-B  
**Turkmenistan** – EUR-B  
**Ukraine** – EUR-C  
**United Kingdom** – EUR-A  
**Uzbekistan** – EUR-B  
**Yugoslavia** – EUR-B

## South-East Asia Region

**Bangladesh** – SEAR-D  
**Bhutan** – SEAR-D  
**Democratic People's  
Republic of Korea** – SEAR-D  
**India** – SEAR-D  
**Indonesia** – SEAR-B  
**Maldives** – SEAR-D  
**Myanmar** – SEAR-D  
**Nepal** – SEAR-D  
**Sri Lanka** – SEAR-B  
**Thailand** – SEAR-B

## Western Pacific Region

**Australia** – WPR-A  
**Brunei Darussalam** – WPR-A  
**Cambodia** – WPR-B  
**China** – WPR-B  
**Cook Islands** – WPR-B  
**Fiji** – WPR-B  
**Japan** – WPR-A  
**Kiribati** – WPR-B  
**Lao People's  
Democratic Republic** – WPR-B  
**Malaysia** – WPR-B  
**Marshall Islands** – WPR-B  
**Micronesia, Federated  
States of** – WPR-B  
**Mongolia** – WPR-B  
**Nauru** – WPR-B  
**New Zealand** – WPR-A  
**Niue** – WPR-B  
**Palau** – WPR-B  
**Papua New Guinea** – WPR-B  
**Philippines** – WPR-B  
**Republic of Korea** – WPR-B  
**Samoa** – WPR-B  
**Singapore** – WPR-A  
**Solomon Islands** – WPR-B  
**Tonga** – WPR-B  
**Tuvalu** – WPR-B  
**Vanuatu** – WPR-B  
**Viet Nam** – WPR-B

## Metrics of particulate matter (PM) used in two-pollutant model analyses

| Category of PM metric               | Particulate pollutants which map to category                                                                                                                                                                                                                                                                                                                                                                                                                           |
|-------------------------------------|------------------------------------------------------------------------------------------------------------------------------------------------------------------------------------------------------------------------------------------------------------------------------------------------------------------------------------------------------------------------------------------------------------------------------------------------------------------------|
| PM <sub>10</sub>                    | PM <sub>7</sub> ; PM <sub>10</sub> ; PM <sub>13</sub> ; ln(PM <sub>7</sub> ); ln (PM <sub>13</sub> ); √(PM <sub>10</sub> ); ln(PM <sub>14</sub> );                                                                                                                                                                                                                                                                                                                     |
| PM <sub>2.5</sub>                   | PM <sub>2.5</sub> ; PM<1; PM <sub>0.5</sub> ; Re-suspended Particulate Matter (RSPM); PM <sub>2.5-1</sub>                                                                                                                                                                                                                                                                                                                                                              |
| PM <sub>10-2.5</sub>                | PM <sub>10-2.5</sub>                                                                                                                                                                                                                                                                                                                                                                                                                                                   |
| Black Smoke                         | Black Smoke; ln(BS); sqrt(BS)                                                                                                                                                                                                                                                                                                                                                                                                                                          |
| Particle Number Concentration (PNC) | 10-100nm; PNC; <100nm; Nucleation <30nm; Aitken 30-100nm; Accumulation 100-290nm; NC 0.03-0.05; NC 0.05-0.1; NC 0.01-0.03; NC 0.01-0.1; PM <sub>2.5</sub> NC; PM <sub>2.5-10</sub> NC; PM <sub>10</sub> NC; PNC size mode 12nm; PNC size mode 23nm; PNC size mode 57nm; PNC size mode 212nm; PNC size mode to 100nm; NC128; NC346; NC total; NC31; 10-100nm surface area                                                                                               |
| Carbon                              | Black Carbon (BC); Elemental Carbon (EC); Organic Carbon (OC); PM <sub>2.5</sub> OC; PM <sub>2.5</sub> EC; PM <sub>2.5</sub> OM; Total Carbon;                                                                                                                                                                                                                                                                                                                         |
| Total Suspended Particles (TSP)     | TSP; ln(TSP); TSP-PM <sub>10</sub> ; PM <sub>20</sub> ; SPM; sqrt(TSP); blackness of TSP filters                                                                                                                                                                                                                                                                                                                                                                       |
| Visibility                          | Coefficient of haze (COH); light scattering (PM <sub>2.5</sub> indicator = nephelometry measure instead of gravimetric); dry light scattering (PM<1 indicator); bsp (PM <sub>2.5</sub> indicator = an indicator for particles 01-2 um (nephelometry measure instead of gravimetric)); visibility (PM <sub>2.5</sub> indicator = digital photography visibility); PM <sub>2.5</sub> nephelometry (PM <sub>2.5</sub> indicator=(nephelometry measure*100,000-.01)/0.28.) |

**Table S1: Meta-analysis results for all-cause mortality in all-ages associated with a 10  $\mu\text{g}/\text{m}^3$  increase in 24 hour  $\text{NO}_2$**

|                                                                               | All<br>SC/MC <sup>a</sup> | Selected<br>SC/MC<br>(cities) <sup>b</sup> | $\text{NO}_2$ , single-pollutant         |                           | $\text{NO}_2$ adjusted for PM           |                           |
|-------------------------------------------------------------------------------|---------------------------|--------------------------------------------|------------------------------------------|---------------------------|-----------------------------------------|---------------------------|
|                                                                               |                           |                                            | Random Effects<br>(95% CI) <sup>c</sup>  | $I^2$<br>(%) <sup>d</sup> | Random Effects<br>(95% CI) <sup>c</sup> | $I^2$<br>(%) <sup>d</sup> |
| <b>Overall, <math>\text{NO}_2</math> + PM<br/>(any PM metric)<sup>e</sup></b> | <b>22/10</b>              | <b>5/1 (26)</b>                            | <b>0.78 (0.47, 1.09)</b>                 |                           | <b>0.60 (0.33, 0.87)</b>                |                           |
| AMR A                                                                         | 5/10                      | 4/1 (16)                                   | 0.48 (0.24, 0.72)                        |                           | 0.55 (0.12, 0.99)                       |                           |
| AMR B                                                                         | 1/0                       | 1/0 (1)                                    | 0.59 (-0.26, 1.45)                       | 66.9                      | 0.01 (-1.10, 1.12)                      | 0                         |
| EUR A                                                                         | 6/0                       | 3/0 (3)                                    | 0.71 (0.20, 1.22)                        |                           | 0.43 (-0.86, 1.73)                      |                           |
| SEAR B                                                                        | 1/0                       | 1/0 (1)                                    | 1.41 (0.89, 1.93)                        |                           | 0.42 (-0.55, 1.40)                      |                           |
| WPR B                                                                         | 9/0                       | 5/0 (5)                                    | 1.00 (0.54, 1.46)                        |                           | 0.85 (0.37, 1.33)                       |                           |
| <b><math>\text{NO}_2</math> + PM<br/>(specific PM metric)<sup>f</sup></b>     |                           |                                            |                                          |                           |                                         |                           |
| $\text{NO}_2$ + $\text{PM}_{10}$                                              | 13/3                      | 4/1 (21)                                   | 0.92 (0.58, 1.72)                        | 88.7                      | 0.85 (0.52, 1.18)                       | 72                        |
| $\text{NO}_2$ + $\text{PM}_{2.5}$                                             | 2/3                       | 2/1 (14)                                   | 0.53 (0.42, 0.64)                        | 0                         | 0.57 (0.24, 0.89)                       | 6.9                       |
| $\text{NO}_2$ + $\text{PM}_{10-2.5}$                                          | 0/3                       | 0/1 (12)                                   | 0.62 (0.19, 1.06)                        | -                         | 0.73 (0.28, 1.18)                       | -                         |
| $\text{NO}_2$ + Visibility                                                    | 0/1                       | 0/1 (12)                                   | 0.60 (0.34, 0.87)                        | -                         | 0.66 (0.33, 1.00)                       | -                         |
| $\text{NO}_2$ + BS                                                            | 1/0                       | -                                          |                                          |                           |                                         |                           |
| $\text{NO}_2$ + TSP                                                           | 3/0                       | -                                          | Insufficient estimates for meta-analysis |                           |                                         |                           |
| $\text{NO}_2$ + PNC                                                           | 3/0                       | -                                          |                                          |                           |                                         |                           |

a -Numbers of pairs of single-city (SC) / multi-city (MC) estimates available from all studies

b -Numbers of pairs of single-city (SC) / multicity (MC) estimates selected for meta-analysis. The number of cities represented by the estimates is given in brackets.

c - Random-effects summary estimates presented as a percentage change (95% confidence interval) in the risk of death per 10  $\mu\text{g}/\text{m}^3$   $\text{NO}_2$ .

d - $I^2$  statistic for heterogeneity between WHO region specific estimates

e -Overall (global) summary estimate of  $\text{NO}_2$  adjusted for PM and by WHO regions. Protocol for selection of PM metrics defined in the methods section. Estimate numbers for Overall refer to: (i) the number of single-city (SC) / multi-city (MC) estimates available from all studies; (ii) for selected estimates, it is the number of pooled (from single-city estimates) and multi-city estimates used to calculate the overall summary estimate across WHO regions.

f - Overall summary estimate of  $\text{NO}_2$  adjusted for specific metrics of PM.

AMR, region of the Americas; EUR, European region; WPR, Western Pacific region; SEAR, South East Asian region.



**Table S2: Meta-analysis results for all-cause mortality in all-ages associated with a 10  $\mu\text{g}/\text{m}^3$  increase in 1 hour  $\text{NO}_2$**

|                                                                                    | All<br>SC/MC <sup>a</sup> | Selected<br>SC/MC<br>(cities) <sup>b</sup> | $\text{NO}_2$ single-pollutant          |                           | $\text{NO}_2$ adjusted for PM           |                           |
|------------------------------------------------------------------------------------|---------------------------|--------------------------------------------|-----------------------------------------|---------------------------|-----------------------------------------|---------------------------|
|                                                                                    |                           |                                            | Random Effects<br>(95% CI) <sup>c</sup> | $I^2$<br>(%) <sup>d</sup> | Random Effects<br>(95% CI) <sup>c</sup> | $I^2$<br>(%) <sup>d</sup> |
| <b>Overall, <math>\text{NO}_2</math> + PM<br/>(any PM metric)<sup>e</sup></b>      | <b>2/4</b>                | <b>2/2 (36)</b>                            | <b>0.32 (-0.02, 0.66)</b>               |                           | <b>0.20 (-0.24, 0.65)</b>               |                           |
| AMR A                                                                              | 1/0                       | 1/0 (1)                                    | 1.19 (0.20, 2.19)                       | 93.8                      | 0.78 (-0.35, 1.92)                      | 95.2                      |
| AMR B                                                                              | 1/0                       | 1/0 (1)                                    | -0.09 (-0.19, 0.00)                     |                           | -0.28 (-0.38, -0.19)                    |                           |
| EUR A                                                                              | 0/3                       | 0/1 (30)                                   | 0.30 (0.22, 0.38)                       |                           | 0.27 (0.16, 0.38)                       |                           |
| WPR A                                                                              | 0/1                       | 0/1 (4)                                    | 0.63 (0.21, 1.05)                       |                           | 0.52 (0.05, 1.00)                       |                           |
| <b>Overall, <math>\text{NO}_2</math> + PM<br/>(specific PM metric)<sup>f</sup></b> |                           |                                            |                                         |                           |                                         |                           |
| $\text{NO}_2$ + $\text{PM}_{10}$                                                   | 2/1                       | 2/1 (32)                                   | 0.22 (-0.15, 0.60)                      | 95.4                      | 0.10 (-0.40, 0.61)                      | 96.5                      |
| $\text{NO}_2$ + BS                                                                 | 0/2                       | 0/1 (30)                                   | 0.30 (0.22, 0.38)                       | -                         | 0.33 (0.23, 0.43)                       | -                         |
| $\text{NO}_2$ + Visibility                                                         | 0/1                       | 0/1 (4)                                    | 0.63 (0.21, 1.05)                       | -                         | 0.52 (0.05, 1.00)                       | -                         |

a -Numbers of pairs of single-city (SC) / multi-city (MC) estimates available from all studies

b -Numbers of pairs of single-city (SC) / multicity (MC) estimates selected for meta-analysis. The number of cities represented by the estimates is given in brackets.

c - Random-effects summary estimates presented as a percentage change (95% confidence interval) in the risk of death per 10  $\mu\text{g}/\text{m}^3$   $\text{NO}_2$ .

d - $I^2$  statistic for heterogeneity between WHO region specific estimates

e -Overall (global) summary estimate of  $\text{NO}_2$  adjusted for PM and by WHO regions. Protocol for selection of PM metrics defined in the methods section. Estimate numbers for Overall refer to: (i) the number of single-city (SC) / multi-city (MC) estimates available from all studies; (ii) for selected estimates, it is the number of pooled (from single-city estimates) and multi-city estimates used to calculate the overall summary estimate across WHO regions.

f - Overall summary estimate of  $\text{NO}_2$  adjusted for specific metrics of PM.

AMR, region of the Americas; EUR, European region; WPR, Western Pacific region; SEAR, South East Asian region.

**Table S3: Meta-analysis results for all cardiovascular mortality in all-ages associated with a 10 µg/m<sup>3</sup> increase in 24 hour NO<sub>2</sub>**

|                                                                          | All<br>SC/MC <sup>a</sup> | Selected<br>SC/MC<br>(cities) <sup>b</sup> | NO <sub>2</sub> , single-pollutant       |                                    | NO <sub>2</sub> adjusted for PM         |                                    |
|--------------------------------------------------------------------------|---------------------------|--------------------------------------------|------------------------------------------|------------------------------------|-----------------------------------------|------------------------------------|
|                                                                          |                           |                                            | Random Effects<br>(95% CI) <sup>c</sup>  | I <sup>2</sup><br>(%) <sup>d</sup> | Random Effects<br>(95% CI) <sup>c</sup> | I <sup>2</sup><br>(%) <sup>d</sup> |
| <b>Overall, NO<sub>2</sub> + PM<br/>(any PM metric)<sup>e</sup></b>      | <b>14/0</b>               | <b>5/0 (10)</b>                            | <b>1.07 (0.43, 1.72)</b>                 |                                    | <b>0.82 (0.22, 1.42)</b>                |                                    |
| AMR A                                                                    | 3/0                       | 2/0 (2)                                    | 0.52 (0.37, 0.68)                        |                                    | 0.47 (0.06, 0.88)                       |                                    |
| AMR B                                                                    | 1/0                       | 1/0 (1)                                    | 0.73 (-0.87, 2.36)                       | 72                                 | -0.36 (-2.47, 1.81)                     | 58.8                               |
| EUR A                                                                    | 3/0                       | 2/0 (2)                                    | 1.97 (-0.66, 4.66)                       |                                    | 1.81 (0.67, 2.97)                       |                                    |
| SEAR B                                                                   | 1/0                       | 1/0 (1)                                    | 1.78 (0.47, 3.11)                        |                                    | -0.51 (-2.88, 1.92)                     |                                    |
| WPR B                                                                    | 6/0                       | 4/0 (4)                                    | 1.37 (0.87, 1.87)                        |                                    | 1.13 (0.67, 1.58)                       |                                    |
| <b>Overall, NO<sub>2</sub> + PM<br/>(specific PM metric)<sup>f</sup></b> |                           |                                            |                                          |                                    |                                         |                                    |
| NO <sub>2</sub> + PM <sub>10</sub>                                       | 10/0                      | 4/0 (8)                                    | 0.99 (0.49, 1.49)                        | 80.1                               | 0.87 (0.28, 1.46)                       | 61                                 |
| NO <sub>2</sub> + PM <sub>2.5</sub>                                      | 2/0                       | 2/0 (2)                                    | Insufficient estimates for meta-analysis |                                    |                                         |                                    |
| NO <sub>2</sub> + BS                                                     | 2/0                       | 2/0 (2)                                    | Insufficient estimates for meta-analysis |                                    |                                         |                                    |

a -Numbers of pairs of single-city (SC) / multi-city (MC) estimates available from all studies

b -Numbers of pairs of single-city (SC) / multicity (MC) estimates selected for meta-analysis. The number of cities represented by the estimates is given in brackets.

c - Random-effects summary estimates presented as a percentage change (95% confidence interval) in the risk of death per 10 µg/m<sup>3</sup> NO<sub>2</sub>.

d -I<sup>2</sup> statistic for heterogeneity between WHO region specific estimates

e -Overall (global) summary estimate of NO<sub>2</sub> adjusted for PM and by WHO regions. Protocol for selection of PM metrics defined in the methods section. Estimate numbers for Overall refer to: (i) the number of single-city (SC) / multi-city (MC) estimates available from all studies; (ii) for selected estimates, it is the number of pooled (from single-city estimates) and multi-city estimates used to calculate the overall summary estimate across WHO regions.

f - Overall summary estimate of NO<sub>2</sub> adjusted for specific metrics of PM.

AMR, region of the Americas; EUR, European region; WPR, Western Pacific region; SEAR, South East Asian region.

**Table S4: Meta-analysis results for all respiratory mortality in all-ages associated with a 10 µg/m<sup>3</sup> increase in 24 hour NO<sub>2</sub>**

|                                                                      | All SC/MC <sup>a</sup> | Selected SC/MC (cities) <sup>b</sup> | NO <sub>2</sub> , single-pollutant       |                                 | NO <sub>2</sub> adjusted for PM      |                                 |
|----------------------------------------------------------------------|------------------------|--------------------------------------|------------------------------------------|---------------------------------|--------------------------------------|---------------------------------|
|                                                                      |                        |                                      | Random Effects (95% CI) <sup>c</sup>     | I <sup>2</sup> (%) <sup>d</sup> | Random Effects (95% CI) <sup>c</sup> | I <sup>2</sup> (%) <sup>d</sup> |
| <b>Overall, NO<sub>2</sub> + PM (any PM metric)<sup>e</sup></b>      | <b>8/0</b>             | <b>3/0 (6)</b>                       | <b>1.42 (0.64, 2.21)</b>                 |                                 | <b>1.13 (0.46, 1.81)</b>             |                                 |
| AMR B                                                                | 1/0                    | 1/0 (1)                              | 1.21 (-1.43, 3.91)                       | 0                               | 0.61 (-2.83, 4.17)                   | 0                               |
| SEAR B                                                               | 1/0                    | 1/0 (1)                              | 1.05 (-0.60, 2.73)                       |                                 | 0.32 (-2.66, 3.39)                   |                                 |
| WPR B                                                                | 6/0                    | 4/0 (4)                              | 1.57 (0.63, 2.51)                        |                                 | 1.20 (0.50, 1.90)                    |                                 |
| <b>Overall, NO<sub>2</sub> + PM (specific PM metric)<sup>f</sup></b> |                        |                                      |                                          |                                 |                                      |                                 |
| NO <sub>2</sub> + PM <sub>10</sub>                                   | 7/0                    | 2/0 (5)                              | 1.44 (0.63, 2.27)                        | 0                               | 1.15 (0.47, 1.84)                    | 0                               |
| NO <sub>2</sub> + PM <sub>2.5</sub>                                  | 1/0                    | 1/0 (1)                              | Insufficient estimates for meta-analysis |                                 |                                      |                                 |

a -Numbers of pairs of single-city (SC) / multi-city (MC) estimates available from all studies

b -Numbers of pairs of single-city (SC) / multicity (MC) estimates selected for meta-analysis. The number of cities represented by the estimates is given in brackets.

c - Random-effects summary estimates presented as a percentage change (95% confidence interval) in the risk of death per 10 µg/m<sup>3</sup> NO<sub>2</sub>.

d -I<sup>2</sup> statistic for heterogeneity between WHO region specific estimates

e -Overall (global) summary estimate of NO<sub>2</sub> adjusted for PM and by WHO regions. Protocol for selection of PM metrics defined in the methods section. Estimate numbers for Overall refer to: (i) the number of single-city (SC) / multi-city (MC) estimates available from all studies; (ii) for selected estimates, it is the number of pooled (from single-city estimates) and multi-city estimates used to calculate the overall summary estimate across WHO regions.

f - Overall summary estimate of NO<sub>2</sub> adjusted for specific metrics of PM.

AMR, region of the Americas; EUR, European region; WPR, Western Pacific region; SEAR, South East Asian region.

**Table S5: Meta-analysis results for stroke mortality in all-ages associated with a 10  $\mu\text{g}/\text{m}^3$  increase in 24 hour  $\text{NO}_2$**

|                                                                                    | All<br>SC/MC <sup>a</sup> | Selected<br>SC/MC<br>(cities) <sup>b</sup> | $\text{NO}_2$ , single-pollutant         |                           | $\text{NO}_2$ adjusted for PM           |                           |
|------------------------------------------------------------------------------------|---------------------------|--------------------------------------------|------------------------------------------|---------------------------|-----------------------------------------|---------------------------|
|                                                                                    |                           |                                            | Random Effects<br>(95% CI) <sup>c</sup>  | $I^2$<br>(%) <sup>d</sup> | Random Effects<br>(95% CI) <sup>c</sup> | $I^2$<br>(%) <sup>d</sup> |
| <b>Overall, <math>\text{NO}_2</math> + PM<br/>(any PM metric)<sup>e</sup></b>      | <b>8/0</b>                | <b>2/0 (5)</b>                             | <b>1.76 (0.68, 2.85)</b>                 |                           | <b>1.12 (0.50, 1.74)</b>                |                           |
| SEAR B                                                                             | 1/0                       | 1/0 (1)                                    | 2.80 (0.70, 4.94)                        | 25.6                      | 1.60 (-2.20, 5.55)                      | 0                         |
| WPR B                                                                              | 7/0                       | 4/0 (4)                                    | 1.47 (0.67, 2.27)                        |                           | 1.11 (0.48, 1.74)                       |                           |
| <b>Overall, <math>\text{NO}_2</math> + PM<br/>(specific PM metric)<sup>f</sup></b> |                           |                                            |                                          |                           |                                         |                           |
| $\text{NO}_2$ + $\text{PM}_{10}$                                                   | 7/0                       | 2/0 (4)                                    | 1.83 (0.76, 2.92)                        | 9.3                       | 1.04 (0.36, 1.73)                       | 0                         |
| $\text{NO}_2$ + TSP                                                                | 1/0                       | 1/0 (1)                                    | Insufficient estimates for meta-analysis |                           |                                         |                           |

a -Numbers of pairs of single-city (SC) / multi-city (MC) estimates available from all studies

b -Numbers of pairs of single-city (SC) / multicity (MC) estimates selected for meta-analysis. The number of cities represented by the estimates is given in brackets.

c - Random-effects summary estimates presented as a percentage change (95% confidence interval) in the risk of death per 10  $\mu\text{g}/\text{m}^3 \text{NO}_2$ .

d - $I^2$  statistic for heterogeneity between WHO region specific estimates

e -Overall (global) summary estimate of  $\text{NO}_2$  adjusted for PM and by WHO regions. Protocol for selection of PM metrics defined in the methods section. Estimate numbers for Overall refer to: (i) the number of single-city (SC) / multi-city (MC) estimates available from all studies; (ii) for selected estimates, it is the number of pooled (from single-city estimates) and multi-city estimates used to calculate the overall summary estimate across WHO regions.

f - Overall summary estimate of  $\text{NO}_2$  adjusted for specific metrics of PM.

AMR, region of the Americas; EUR, European region; WPR, Western Pacific region; SEAR, South East Asian region.

**Table S6: Meta-analysis results for all-cause mortality in all-ages associated with a 10 µg/m<sup>3</sup> increase in metrics of Particulate Matter (PM) - estimates adjusted for 24 hour NO<sub>2</sub>**

|                            | All SC/MC <sup>a</sup> | Selected SC/MC (cities) <sup>b</sup> | PM, single-pollutant                            |                                 | PM adjusted for 24 hour NO <sub>2</sub> |                                 |
|----------------------------|------------------------|--------------------------------------|-------------------------------------------------|---------------------------------|-----------------------------------------|---------------------------------|
|                            |                        |                                      | Random Effects (95% CI) <sup>c</sup>            | I <sup>2</sup> (%) <sup>d</sup> | Random Effects (95% CI) <sup>c</sup>    | I <sup>2</sup> (%) <sup>d</sup> |
| <b>PM<sub>10</sub></b>     |                        |                                      |                                                 |                                 |                                         |                                 |
| <b>Overall<sup>e</sup></b> | <b>12/3</b>            | <b>4/1 (21)</b>                      | <b>0.51 (0.29, 0.74)</b>                        | <b>82.9</b>                     | <b>0.18 (-0.11, 0.47)</b>               | <b>71.9</b>                     |
| AMR A                      | 3/3                    | 3/1 (15)                             | 0.49 (0.31, 0.66)                               |                                 | 0.33 (-0.04, 0.71)                      |                                 |
| EUR A                      | 1/0                    | 1/0 (1)                              | 0.28 (0.05, 0.52)                               |                                 | -0.24 (-0.55, 0.07)                     |                                 |
| SEAR B                     | 1/0                    | 1/0 (1)                              | 1.25 (0.82, 1.68)                               |                                 | 0.96 (0.17, 1.76)                       |                                 |
| WPR B                      | 7/0                    | 4/0 (4)                              | 0.35 (0.22, 0.47)                               |                                 | 0.05 (-0.06, 0.17)                      |                                 |
| <b>PM<sub>2.5</sub></b>    |                        |                                      |                                                 |                                 |                                         |                                 |
| <b>Overall<sup>e</sup></b> | <b>2/3</b>             | <b>2/1 (14)</b>                      | <b>0.74 (0.34, 1.14)</b>                        | <b>19.6</b>                     | <b>0.54 (-0.25, 1.34)</b>               | <b>23.9</b>                     |
| AMR A                      | 1/3                    | 1/1 (13)                             | 0.66 (0.23, 1.08)                               |                                 | 0.33 (-0.54, 1.22)                      |                                 |
| AMR B                      | 1/0                    | 1/0 (1)                              | 1.36 (0.20, 2.53)                               |                                 | 1.33 (-0.12, 2.80)                      |                                 |
| <b>PM<sub>10-2.5</sub></b> | <b>0/3</b>             | <b>0/1 (12)</b>                      | <b>0.65 (-0.10, 1.42)</b>                       | <b>-</b>                        | <b>0.31 (-0.49, 1.11)</b>               | <b>-</b>                        |
| <b>Visibility</b>          | <b>0/1</b>             | <b>0/1 (12)</b>                      | <b>40.93 (23.39, 60.97)</b>                     | <b>-</b>                        | <b>12.42 (-4.47, 32.29)</b>             | <b>-</b>                        |
| <b>Black Smoke</b>         | <b>1/0</b>             | <b>-</b>                             | <b>Insufficient estimates for meta-analysis</b> |                                 |                                         |                                 |
| <b>PNC</b>                 | <b>3/0</b>             | <b>-</b>                             |                                                 |                                 |                                         |                                 |
| <b>TSP</b>                 | <b>3/0</b>             | <b>-</b>                             |                                                 |                                 |                                         |                                 |

a -Numbers of pairs of single-city (SC) / multi-city (MC) estimates available from all studies

b -Numbers of pairs single-city (SC) / multicity (MC) estimates selected for meta-analysis. The number of cities represented by the selected estimates is given in brackets.

c - Random-effects summary estimates presented as a percentage change (95% confidence interval) in the risk of death per 10 µg/m<sup>3</sup> increase in 24 hour measures of PM. Estimates presented for 'Overall' and by WHO Region.

d -I<sup>2</sup> statistic for heterogeneity between WHO region-specific effect estimates

e -Estimate numbers for 'Overall' refer to: (i) the number of single-city (SC) / multi-city (MC) estimates available from all studies; (ii) for selected estimates, it is the number of pooled (from single-city estimates) and multi-city estimates used to calculate the overall summary estimate across WHO regions.

AMR, region of the Americas; Eur, European region; WPR, Western Pacific region; SEAP, South East Asian region.

**Table S7: Meta-analysis results for all cardiovascular mortality in all-ages associated with a 10 µg/m<sup>3</sup> increase in metrics of Particulate Matter (PM) - estimates adjusted for 24 hour NO<sub>2</sub>**

|                            | All<br>SC/MC <sup>a</sup> | Selected<br>SC/MC<br>(cities) <sup>b</sup> | PM, single-pollutant                            |                                    | PM adjusted for 24 hour<br>NO <sub>2</sub> |                                    |
|----------------------------|---------------------------|--------------------------------------------|-------------------------------------------------|------------------------------------|--------------------------------------------|------------------------------------|
|                            |                           |                                            | Random Effects<br>(95% CI) <sup>c</sup>         | I <sup>2</sup><br>(%) <sup>d</sup> | Random Effects<br>(95% CI) <sup>c</sup>    | I <sup>2</sup><br>(%) <sup>d</sup> |
| <b>PM<sub>10</sub></b>     |                           |                                            |                                                 |                                    |                                            |                                    |
| <b>Overall<sup>e</sup></b> | <b>9/0</b>                | <b>4/0 (8)</b>                             | <b>0.48 (0.18, 0.78)</b>                        | <b>66.5</b>                        | <b>0.19 (-0.21, 0.59)</b>                  | <b>67.1</b>                        |
| AMR A                      | 2/0                       | 2/0 (2)                                    | 0.43 (0.17, 0.70)                               |                                    | 0.33 (0.03, 0.62)                          |                                    |
| EUR A                      | 1/0                       | 1/0 (1)                                    | 0.19 (-0.16, 0.54)                              |                                    | -0.32 (-0.80, 0.17)                        |                                    |
| SEAR B                     | 1/0                       | 1/0 (1)                                    | 1.90 (0.80, 3.01)                               |                                    | 2.27 (0.24, 4.34)                          |                                    |
| WPR B                      | 5/0                       | 4/0 (4)                                    | 0.48 (0.26, 0.70)                               |                                    | 0.22 (-0.09, 0.54)                         |                                    |
| <b>PM<sub>2.5</sub></b>    | <b>2/0</b>                | <b>-</b>                                   | <b>Insufficient estimates for meta-analysis</b> |                                    |                                            |                                    |
| <b>Black Smoke</b>         | <b>1/0</b>                | <b>-</b>                                   |                                                 |                                    |                                            |                                    |

a -Numbers of pairs of single-city (SC) / multi-city (MC) estimates available from all studies

b -Numbers of pairs single-city (SC) / multicity (MC) estimates selected for meta-analysis. The number of cities represented by the selected estimates is given in brackets.

c - Random-effects summary estimates presented as a percentage increase (95% confidence interval) in the risk of death per 10 µg/m<sup>3</sup> increase in 24 hour measures of PM. Estimates presented for 'Overall' and by WHO Region.

d -I<sup>2</sup> statistic for heterogeneity between WHO region-specific effect estimates

e -Estimate numbers for 'Overall' refer to: (i) the number of single-city (SC) / multi-city (MC) estimates available from all studies; (ii) for selected estimates, it is the number of pooled (from single-city estimates) and multi-city estimates used to calculate the overall summary estimate across WHO Regions.

AMR, region of the Americas; Eur, European region; WPR, Western Pacific region; SEAP, South East Asian region.

**Table S8: Meta-analysis results for all respiratory mortality in all-ages associated with a 10 µg/m<sup>3</sup> increase in metrics of Particulate Matter (PM) - estimates adjusted for 24 hour NO<sub>2</sub>**

|                            | All SC/MC <sup>a</sup> | Selected SC/MC (cities) <sup>b</sup> | PM, single-pollutant                            |                                 | PM adjusted for 24 hour NO <sub>2</sub> |                                 |
|----------------------------|------------------------|--------------------------------------|-------------------------------------------------|---------------------------------|-----------------------------------------|---------------------------------|
|                            |                        |                                      | Random Effects (95% CI) <sup>c</sup>            | I <sup>2</sup> (%) <sup>d</sup> | Random Effects (95% CI) <sup>c</sup>    | I <sup>2</sup> (%) <sup>d</sup> |
| <b>PM<sub>10</sub></b>     |                        |                                      |                                                 |                                 |                                         |                                 |
| <b>Overall<sup>e</sup></b> | <b>6/0</b>             | <b>2/0 (6)</b>                       | <b>0.58 (0.22, 0.93)</b>                        | <b>0</b>                        | <b>0.13 (-0.18, 0.44)</b>               | <b>0</b>                        |
| SEAR B                     | 1/0                    | 1/0 (1)                              | 1.01 (-0.36, 2.40)                              |                                 | 0.79 (-1.70, 3.34)                      |                                 |
| WPR B                      | 5/0                    | 4/0 (4)                              | 0.54 (0.17, 0.92)                               |                                 | 0.12 (-0.19, 0.43)                      |                                 |
| <b>PM<sub>2.5</sub></b>    | <b>1/0</b>             | <b>-</b>                             | <b>Insufficient estimates for meta-analysis</b> |                                 |                                         |                                 |

a -Numbers of pairs of single-city (SC) / multi-city (MC) estimates available from all studies

b -Numbers of pairs single-city (SC) / multicity (MC) estimates selected for meta-analysis. The number of cities represented by the selected estimates is given in brackets.

c - Random-effects summary estimates presented as a percentage increase (95% confidence interval) in the risk of death per 10 µg/m<sup>3</sup> increase in 24 hour measures of PM. Estimates presented for 'Overall' and by WHO Region.

d -I<sup>2</sup> statistic for heterogeneity between WHO region-specific effect estimates

e -Estimate numbers for 'Overall' refer to: (i) the number of single-city (SC) / multi-city (MC) estimates available from all studies; (ii) for selected estimates, it is the number of pooled (from single-city estimates) and multi-city estimates used to calculate the overall summary estimate across WHO Regions.

WPR, Western Pacific region; SEAR, South East Asian region.

**Figure S1: Studies and two-pollutant model estimates selected for meta-analysis for all-cause mortality, all ages, 24 hour NO<sub>2</sub>**

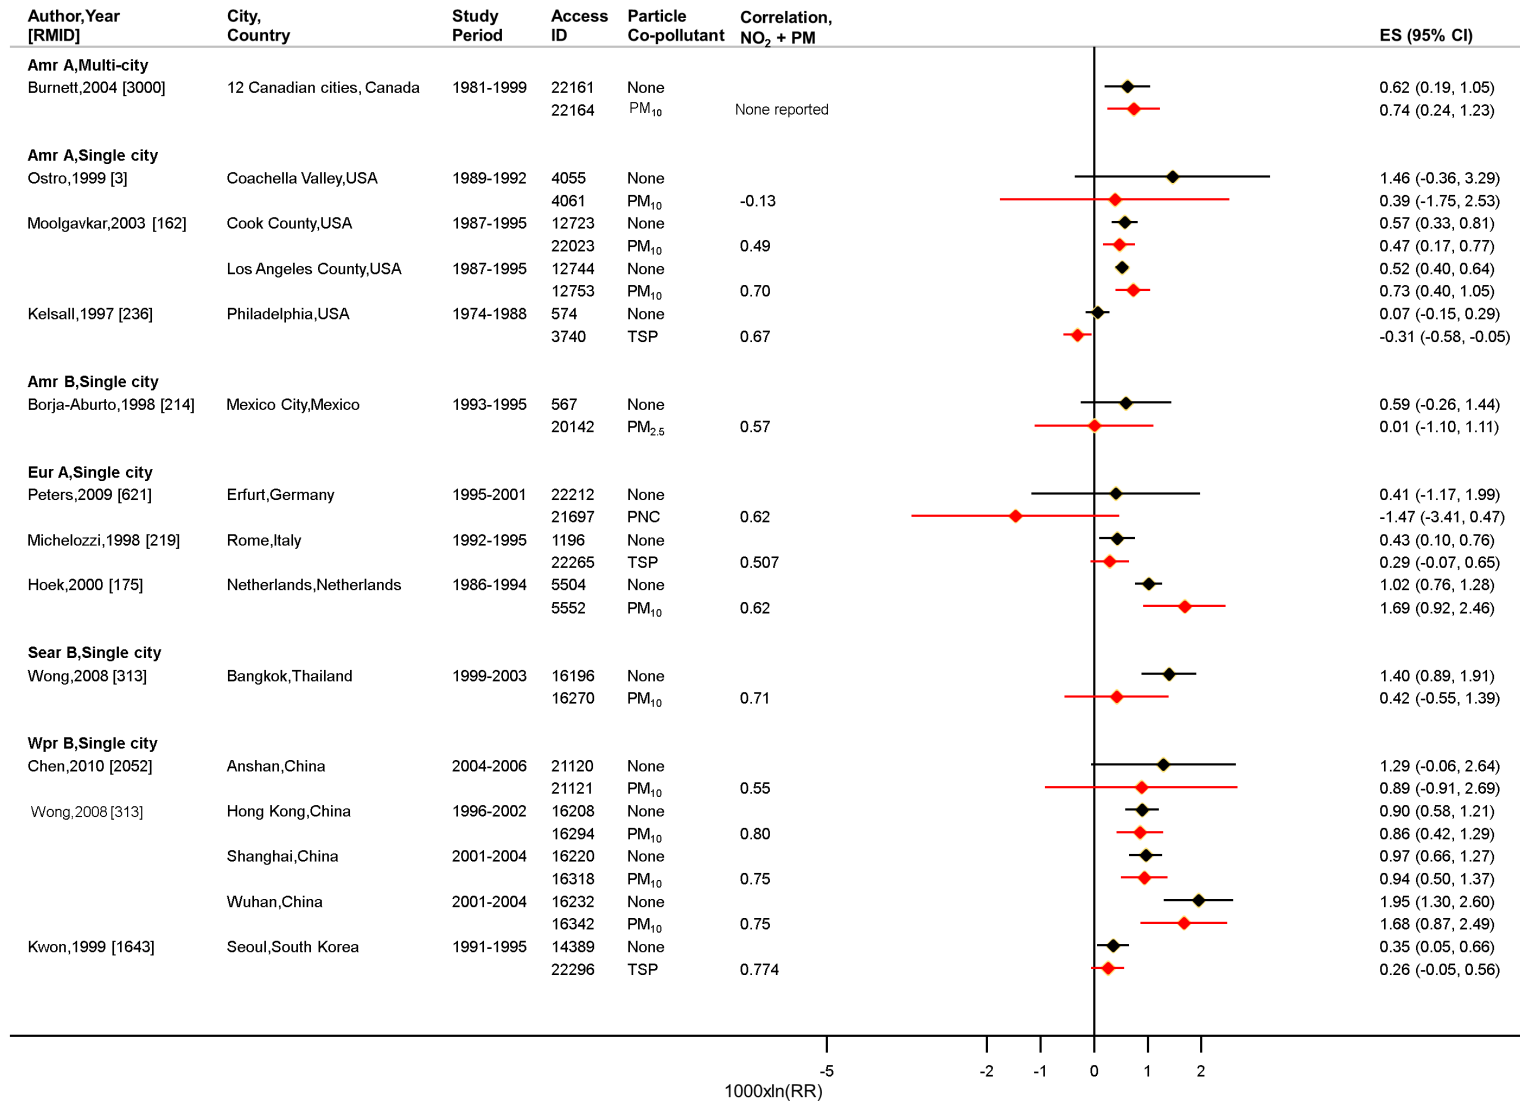



**Figure S2: All available studies providing two-pollutant model estimates for meta-analysis for all-cause mortality, all ages, 1 hour NO<sub>2</sub>**

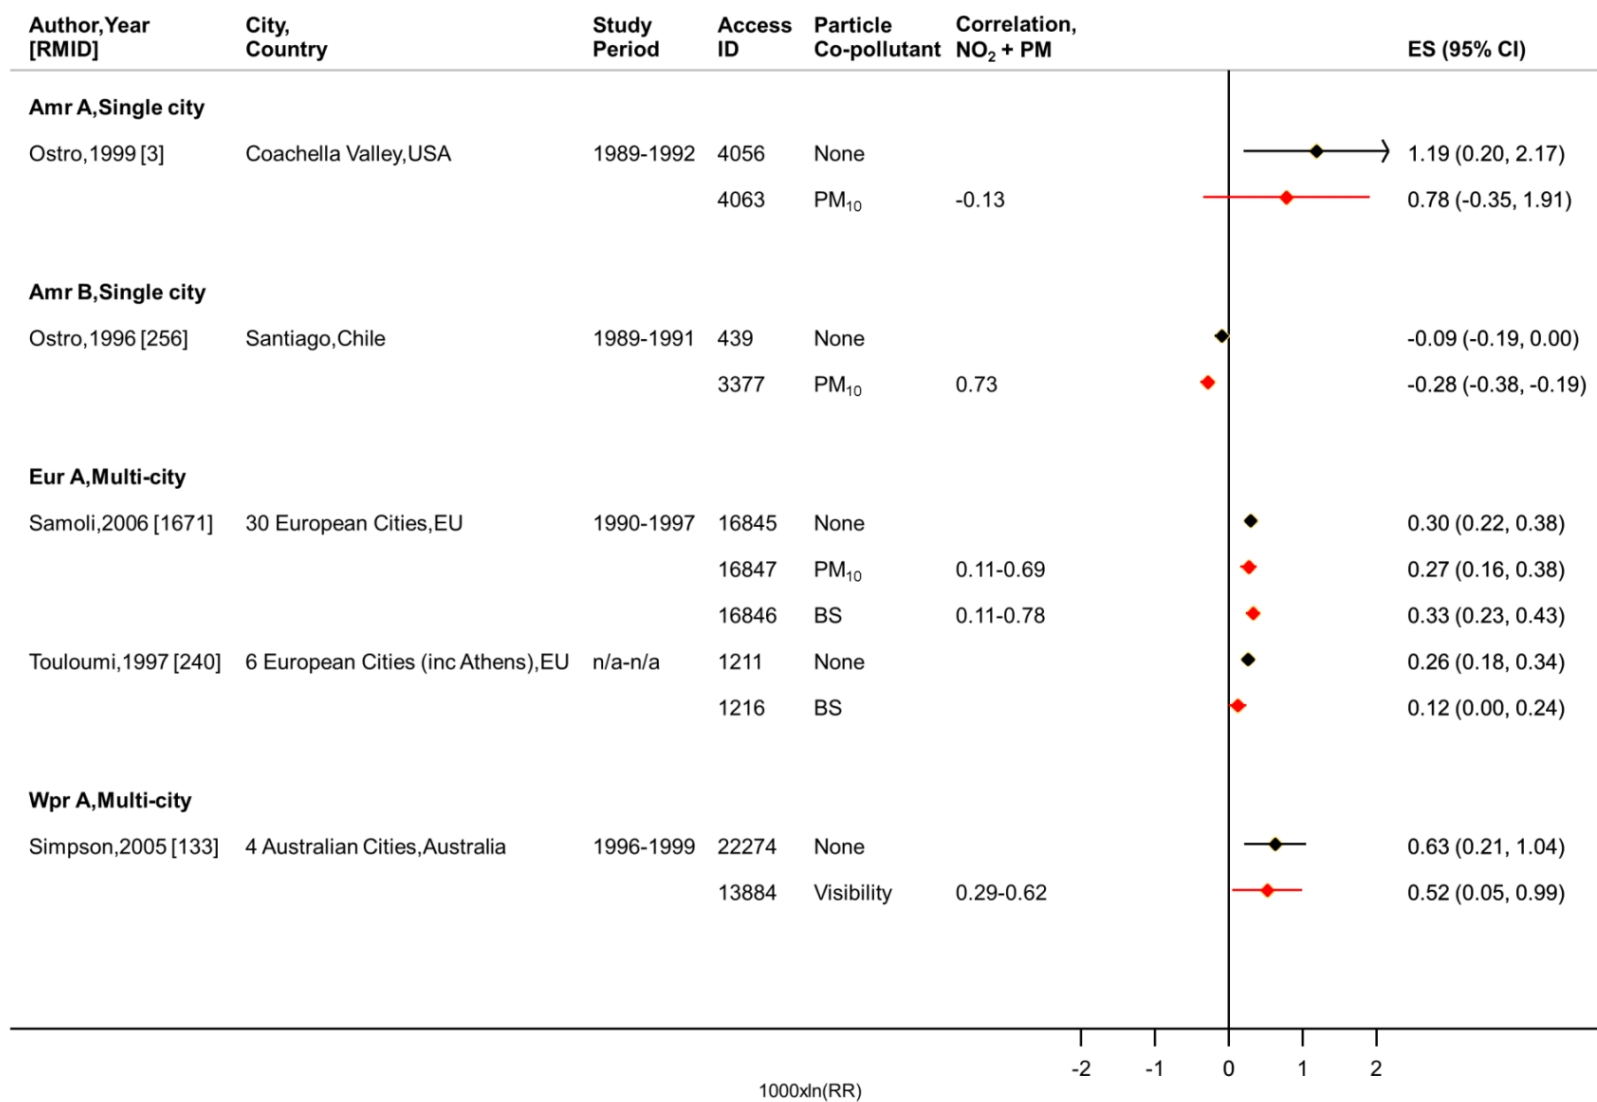

**Figure S3: All available studies providing two-pollutant model estimates for meta-analysis for all cardiovascular mortality, all ages, 24 hour NO<sub>2</sub>**

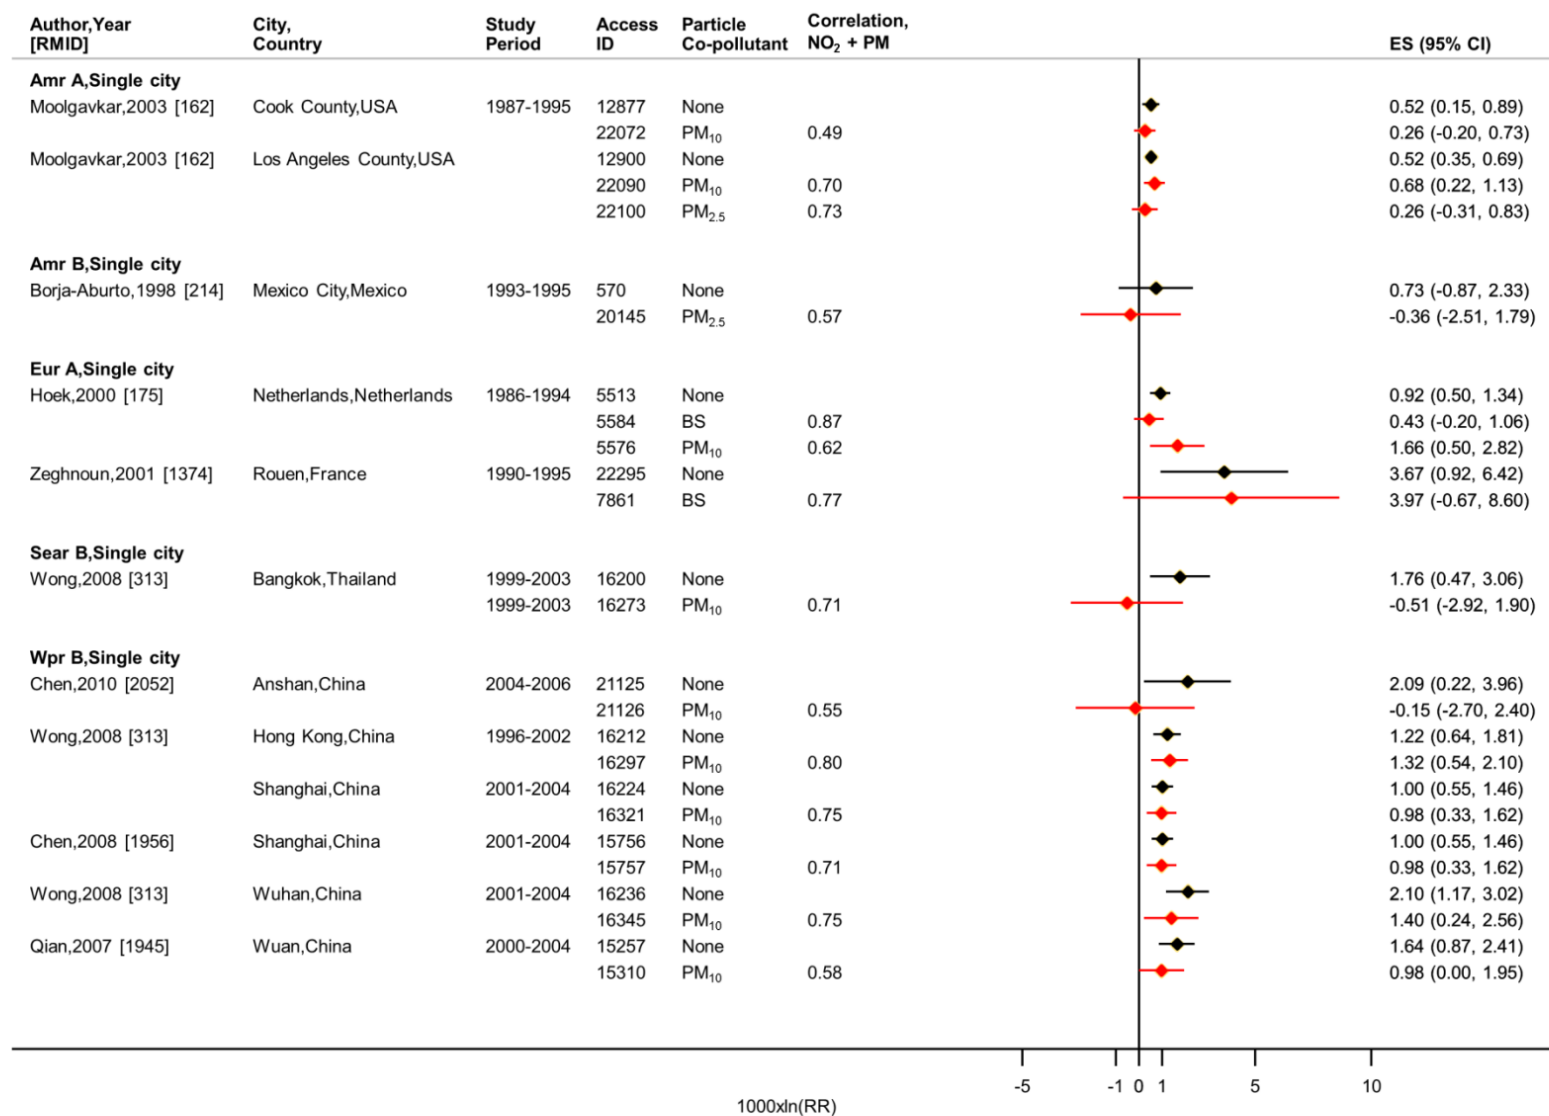

**Figure S4: All available studies providing two-pollutant model estimates for meta-analysis for all cardiovascular mortality, all ages, 1 hour NO<sub>2</sub>**

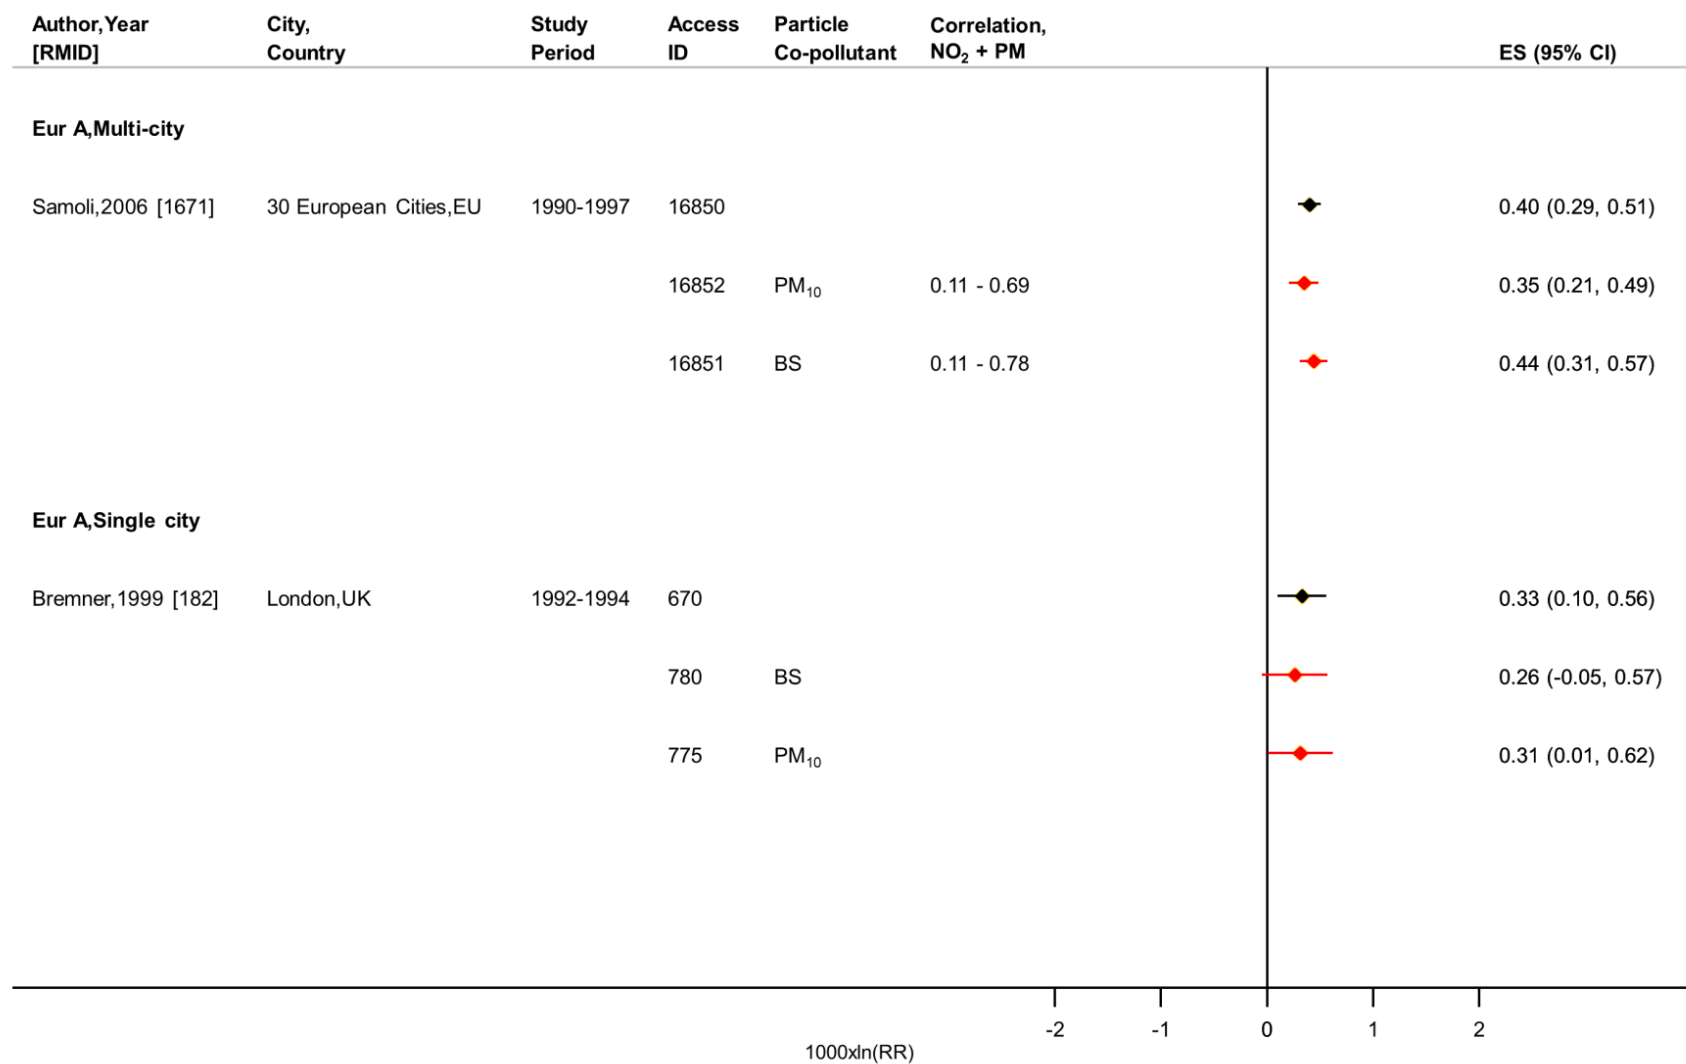

**Figure S5: All available studies providing two-pollutant model estimates for meta-analysis for all respiratory mortality, all ages, 24 hour NO<sub>2</sub>**

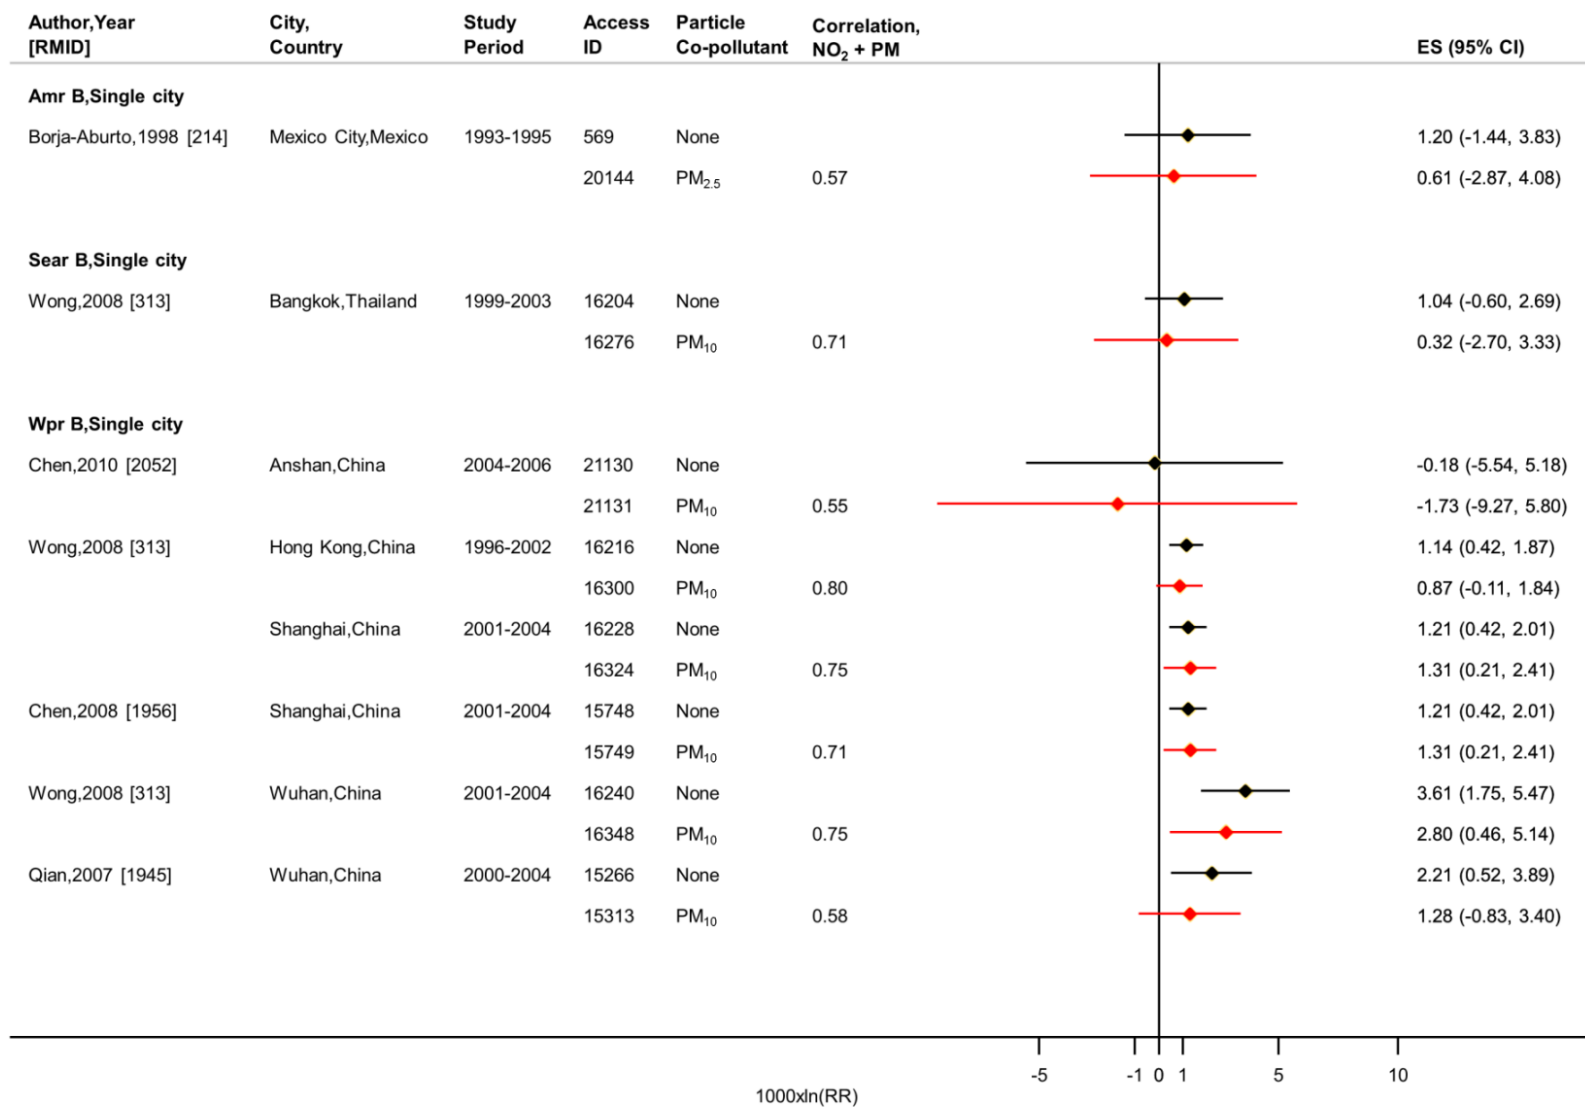

**Figure S6: All available studies providing two-pollutant model estimates for meta-analysis for stroke mortality, all ages, 24 hour NO<sub>2</sub>**

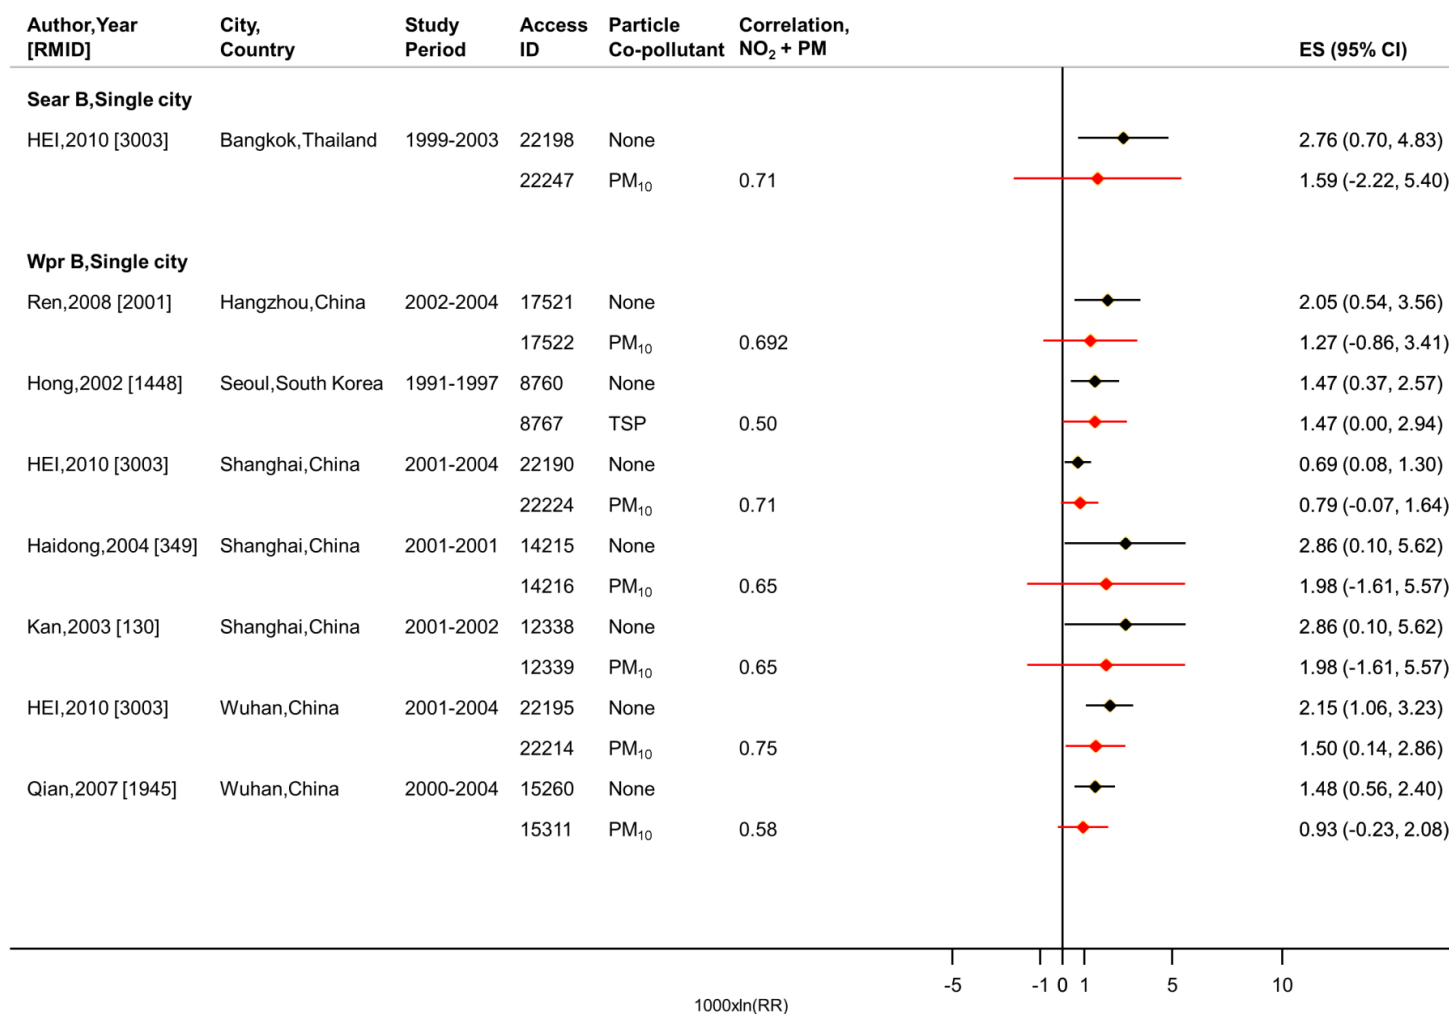

**Figure S7: All available studies providing two-pollutant model estimates for meta-analysis for cardiac mortality, all ages, 24 hour NO<sub>2</sub>**

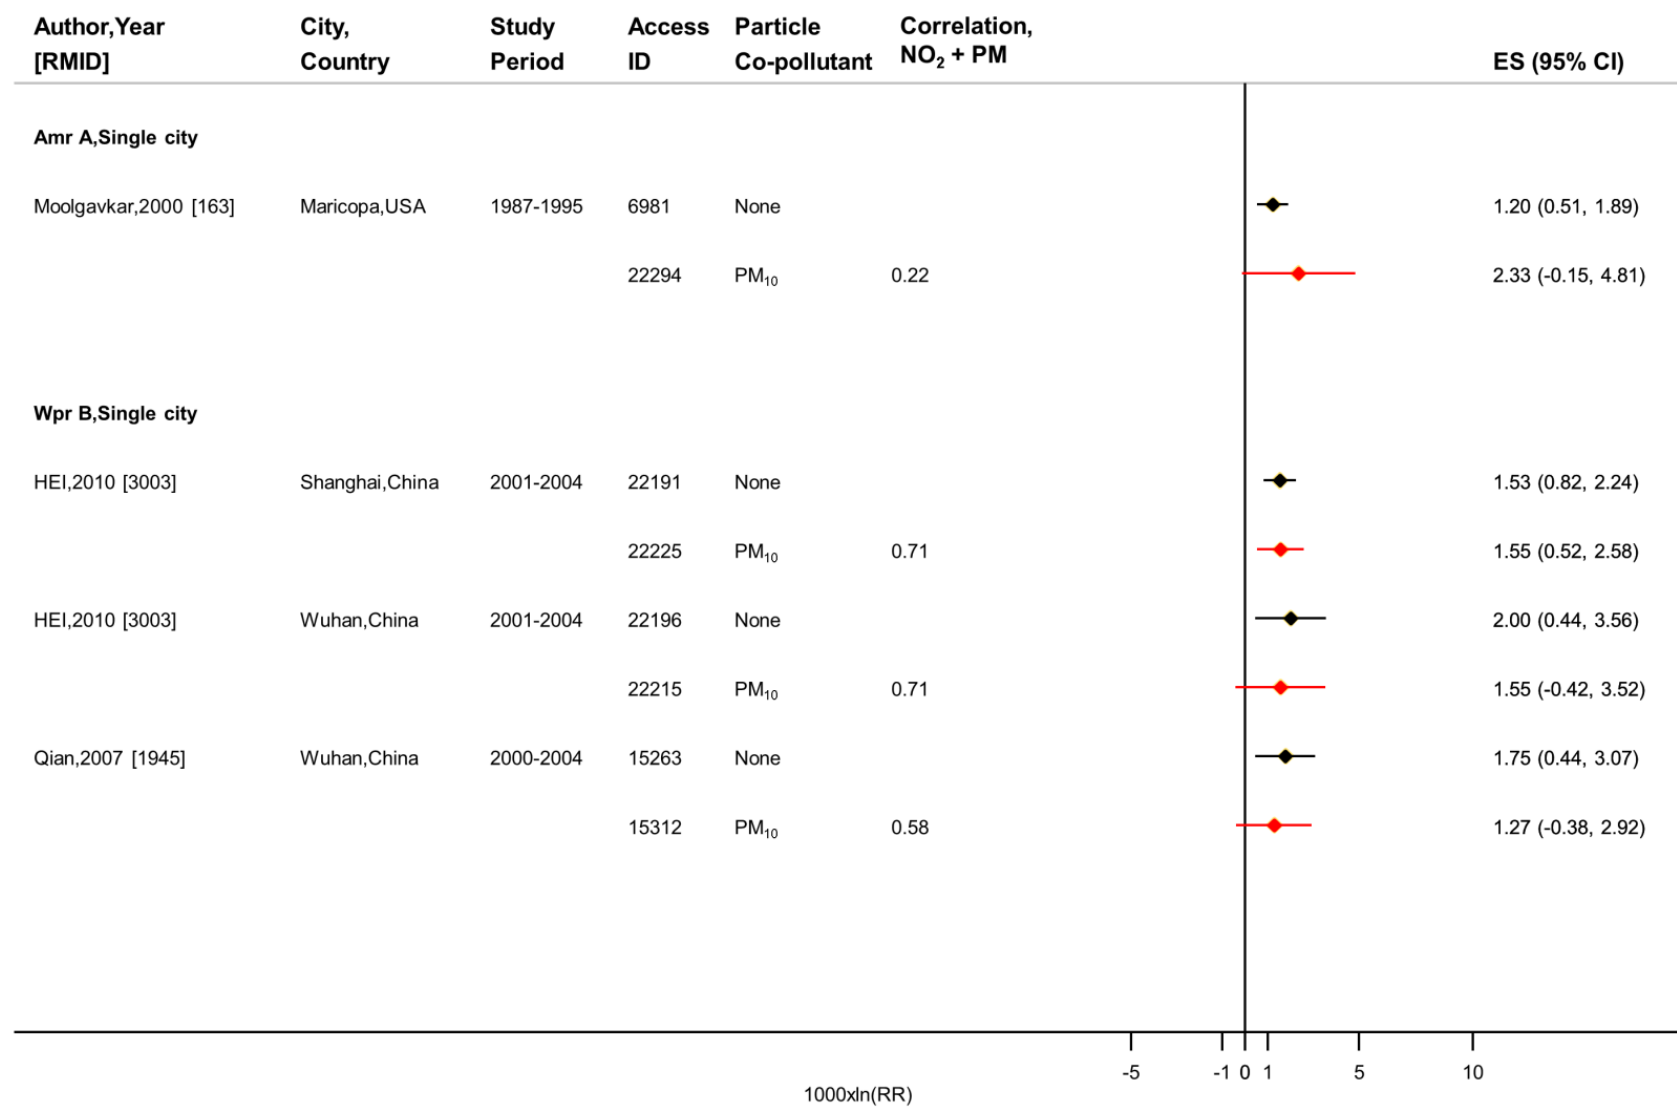

**Figure S8: All available studies providing two-pollutant model estimates for meta-analysis for COPD (including asthma), Lower Respiratory Infections (LRI), ischaemic heart disease (IHD), dysrhythmia (DYS) mortality, all ages, 24 hour NO<sub>2</sub>**

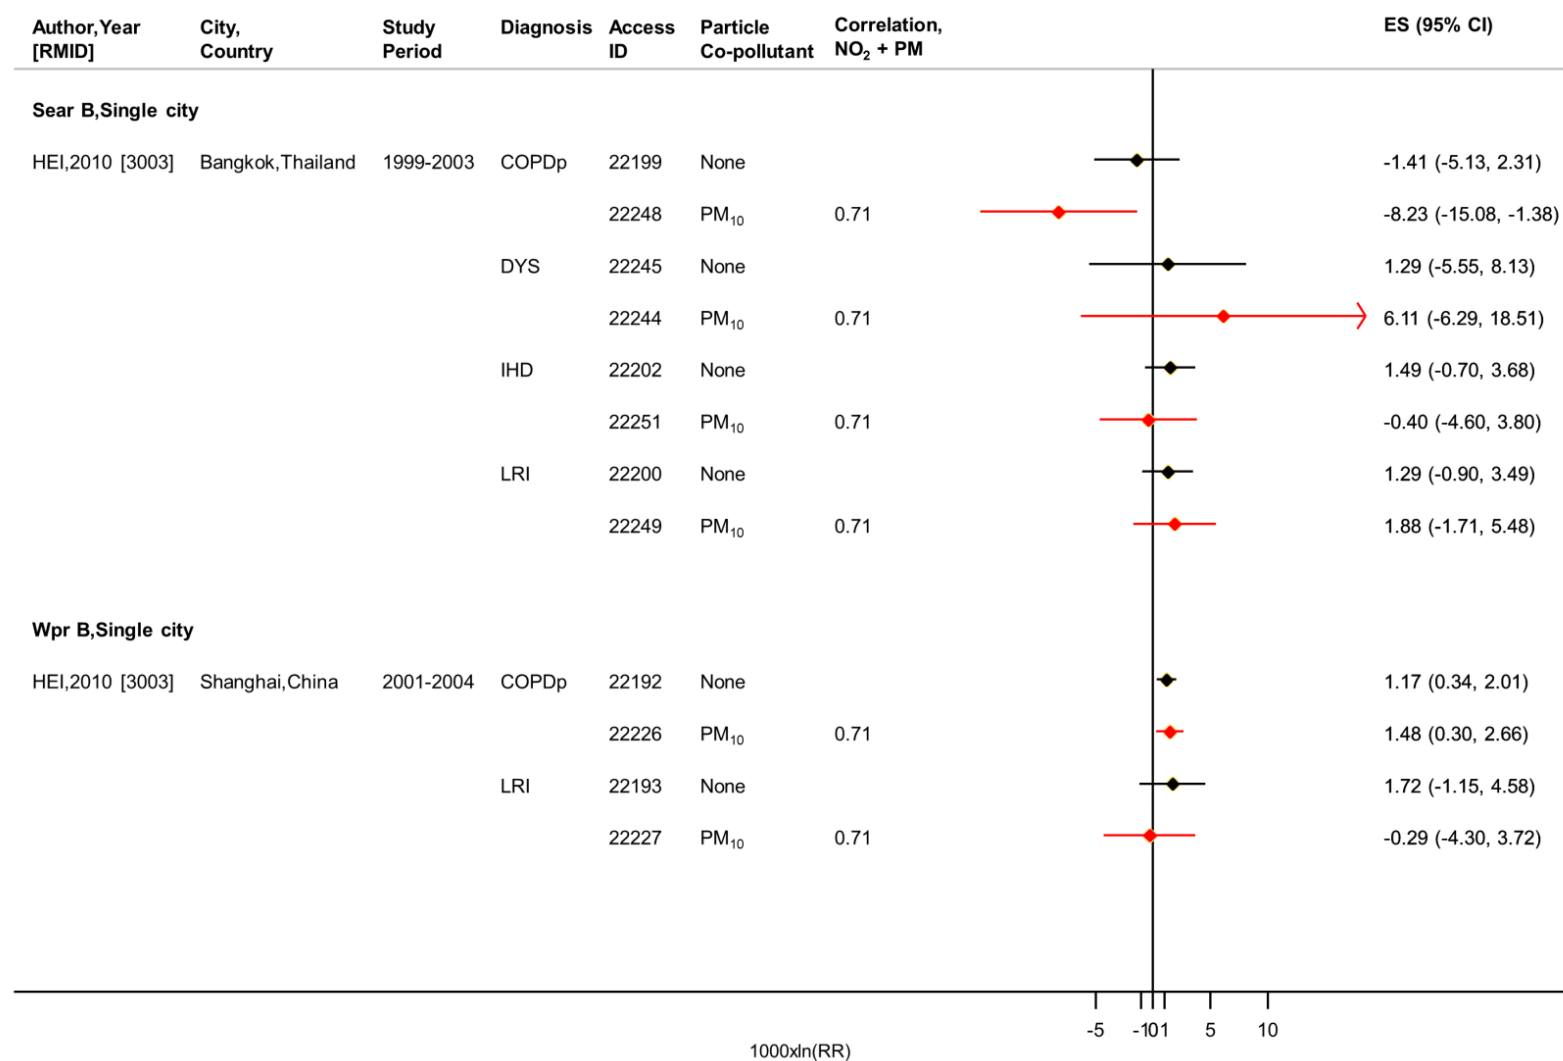

**Figure S9: Studies and two-pollutant model estimates selected for meta-analysis for all cardiovascular mortality, all ages, 24 hour NO<sub>2</sub>**

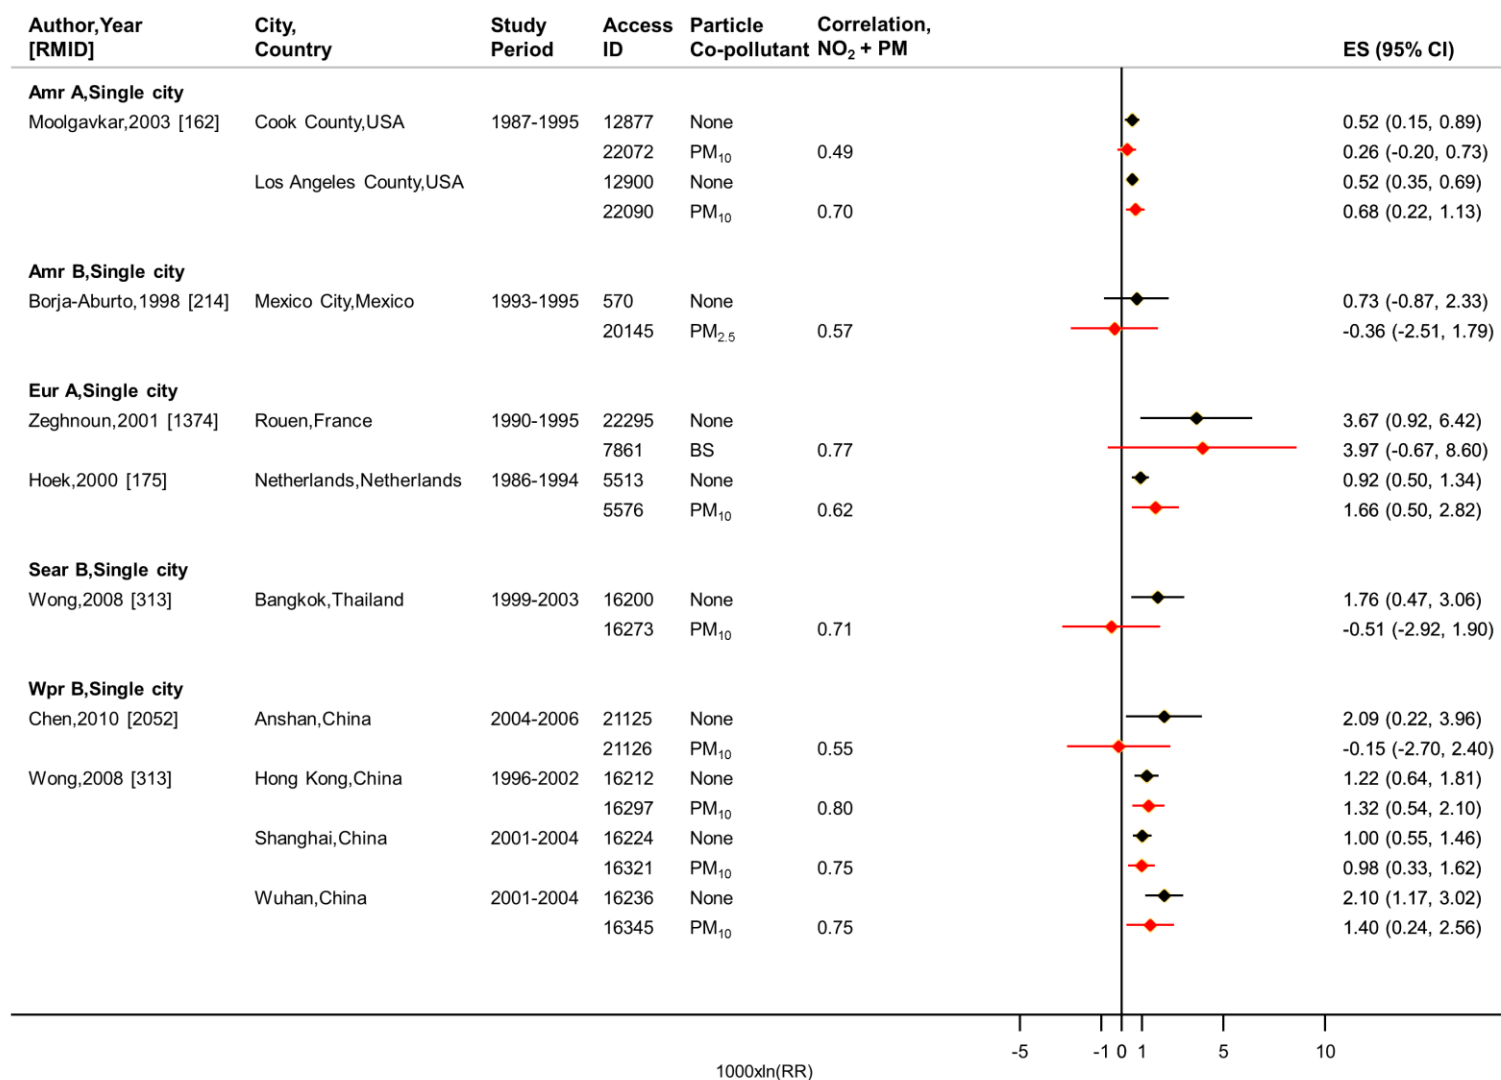



**Figure S10: Studies and two-pollutant model estimates selected for meta-analysis for all respiratory mortality, all ages, 24 hour NO<sub>2</sub>**

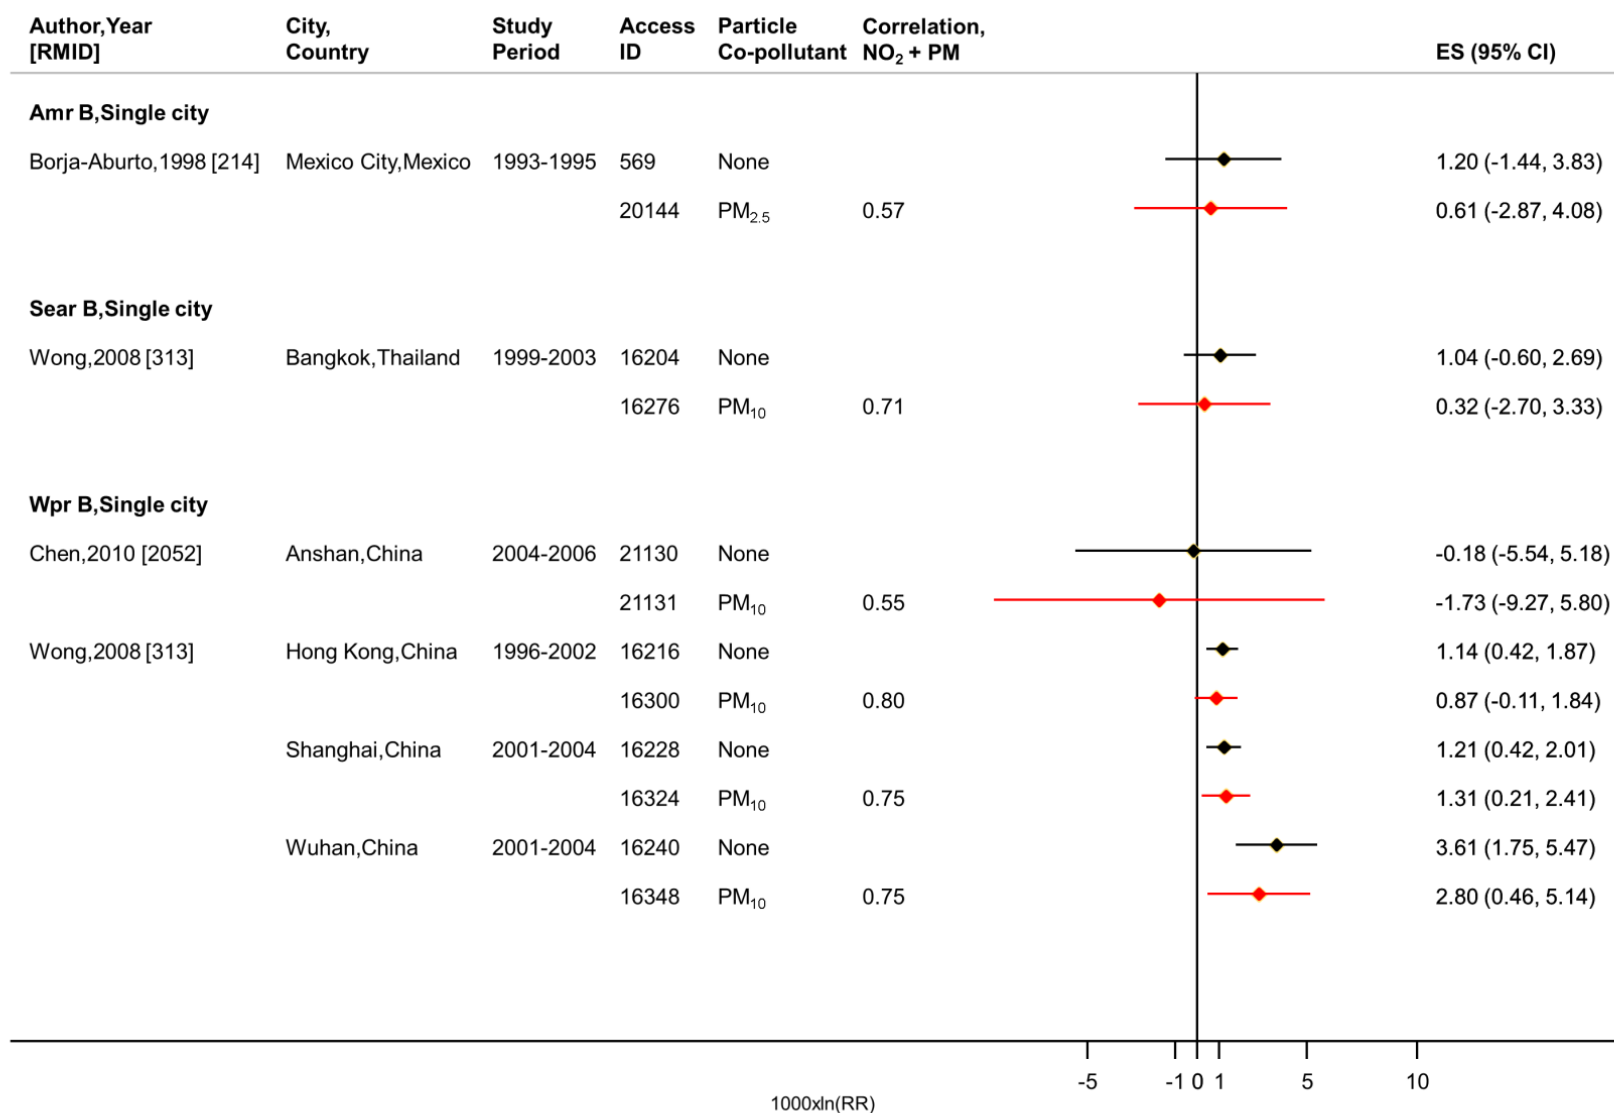

**Figure S11: All studies providing two-pollutant model estimates for all-cause mortality, all-ages, ultrafine particles (UFP) adjusted for 24 hour NO<sub>2</sub>**

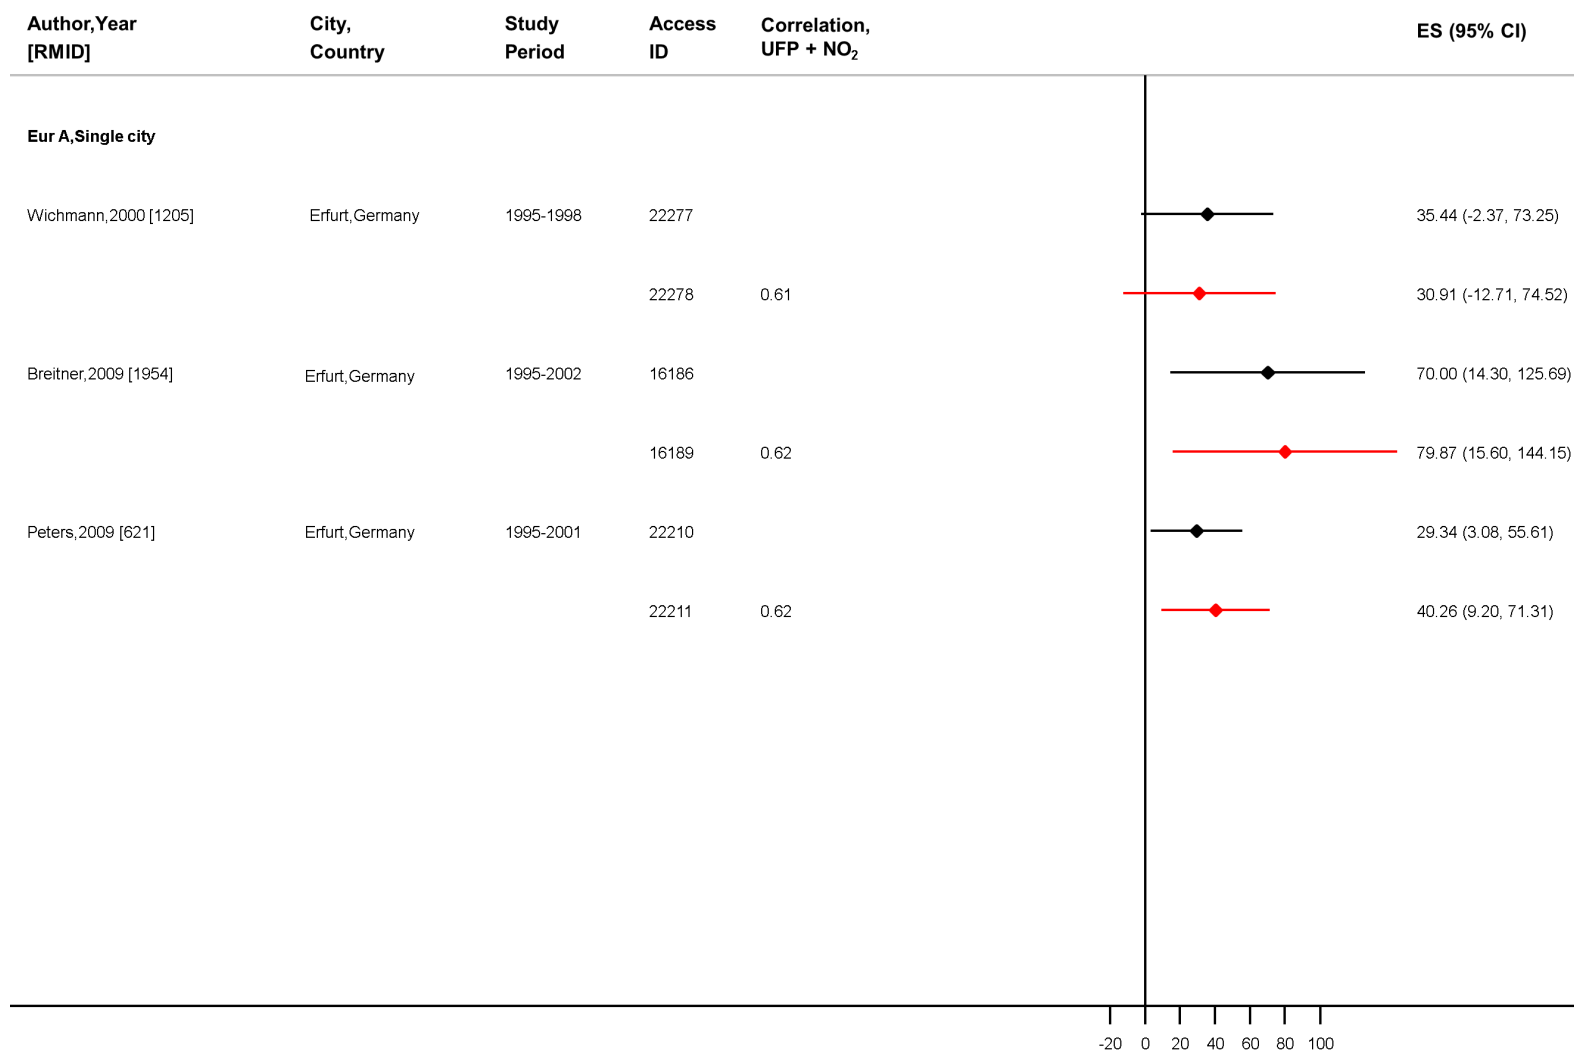

**Figure S12: All studies providing two-pollutant model estimates for all cardiovascular mortality, all-ages, PM adjusted for 24 hour NO<sub>2</sub>**

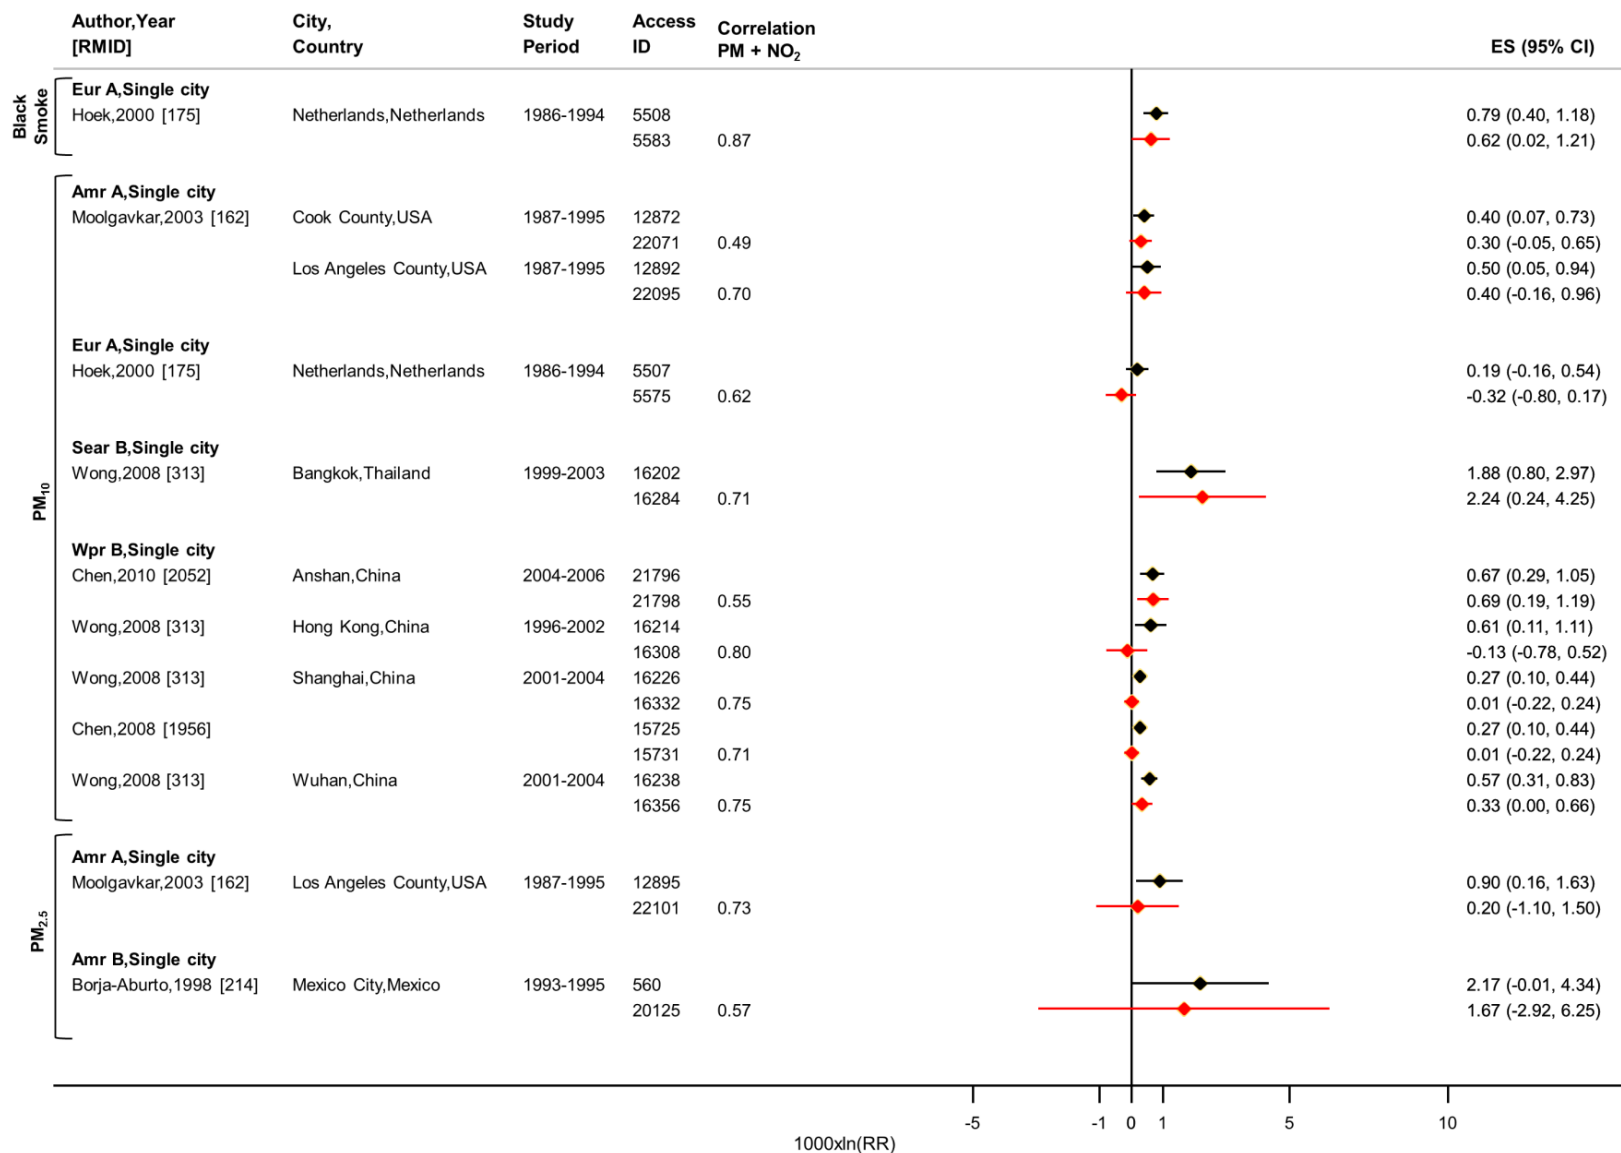

**Figure S13: All studies providing two-pollutant model estimates for all respiratory mortality, all-ages, PM adjusted for 24 hour NO<sub>2</sub>**

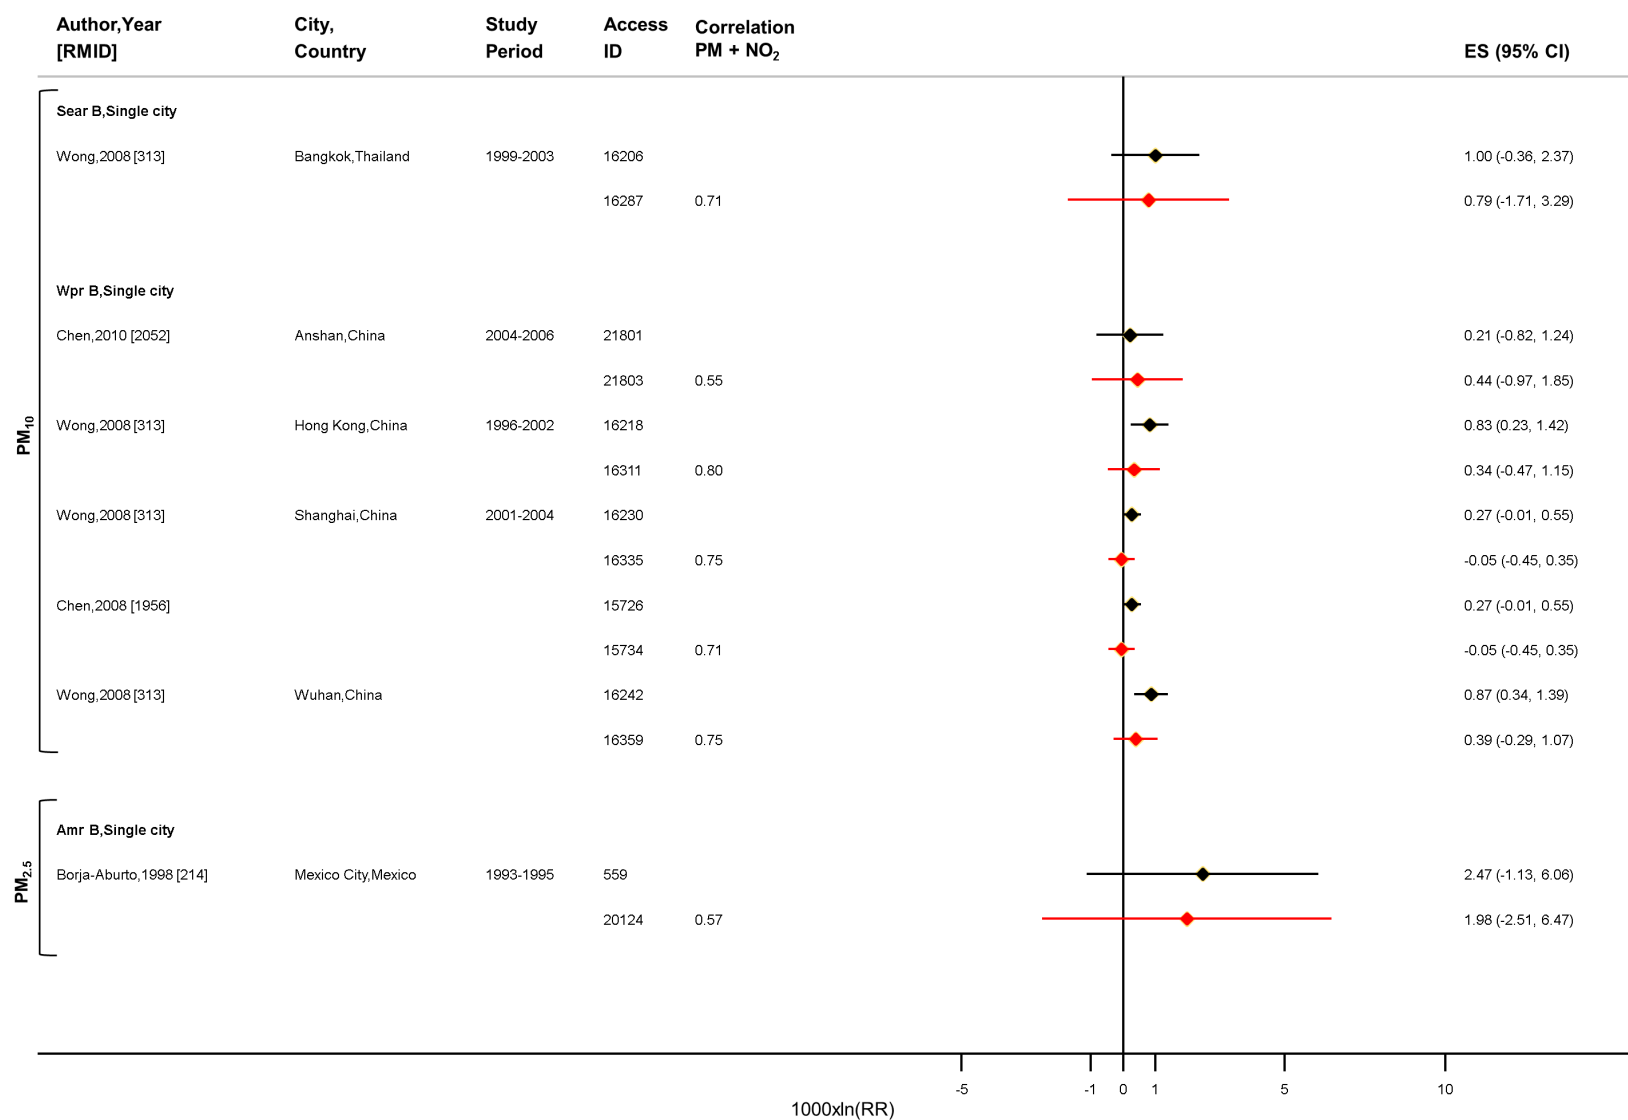

**Figure S14: Studies providing two-pollutant model estimates for meta-analysis for all respiratory hospital admissions, various age groups, 24 hour NO<sub>2</sub>**

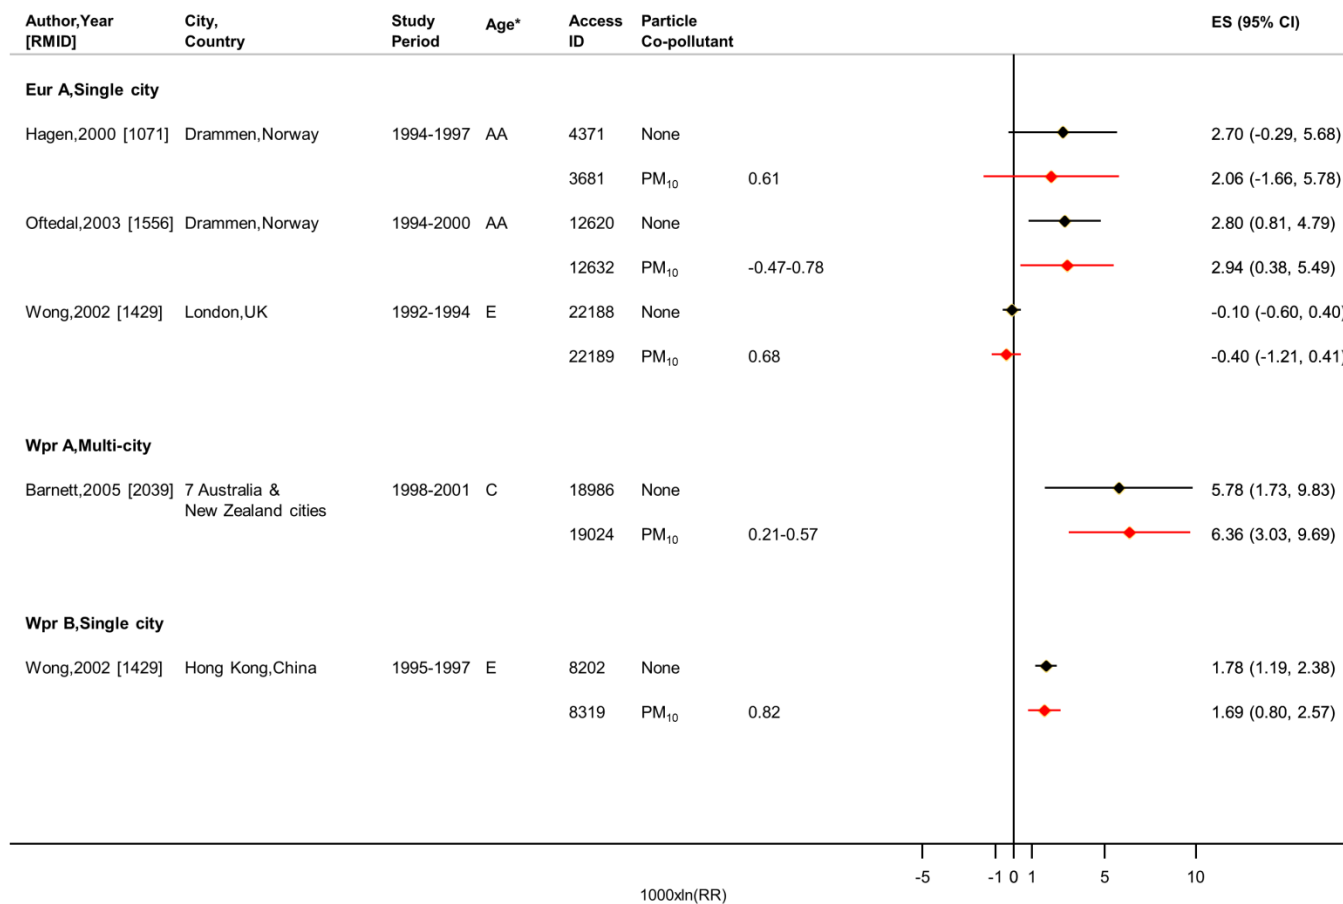

\* Age: AA = all ages; E = Elderly; C = Children

**Figure S15: Studies providing two-pollutant model estimates for meta-analysis for all respiratory hospital admissions, various age groups, 1 hour NO<sub>2</sub>**

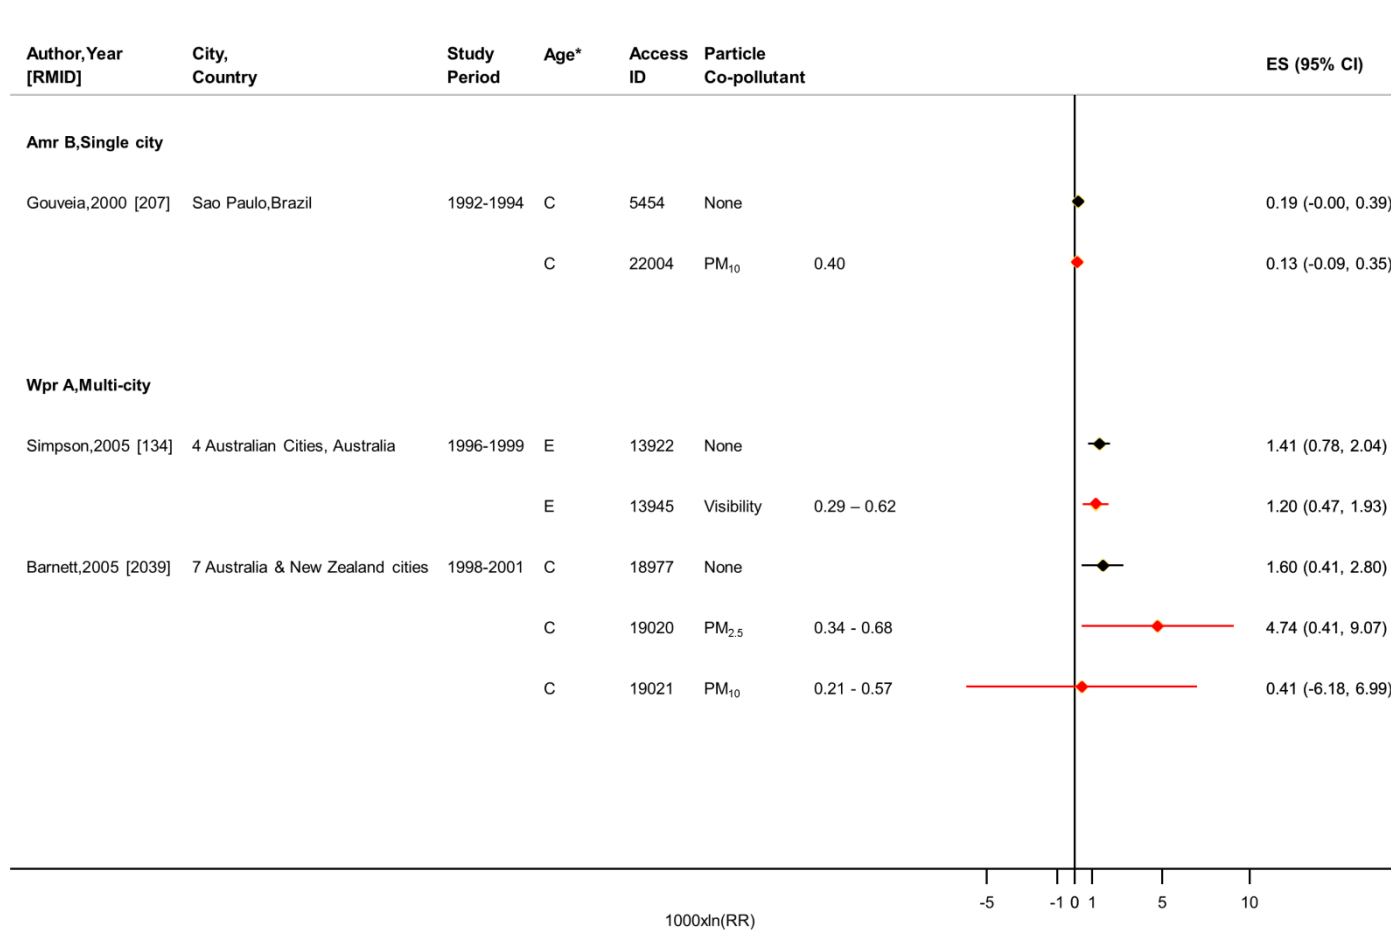

\* Age: C = Children; E = Elderly

**Figure S16: Studies providing two-pollutant model estimates for meta-analysis for hospital admissions for asthma, children, 24 hour NO<sub>2</sub>**

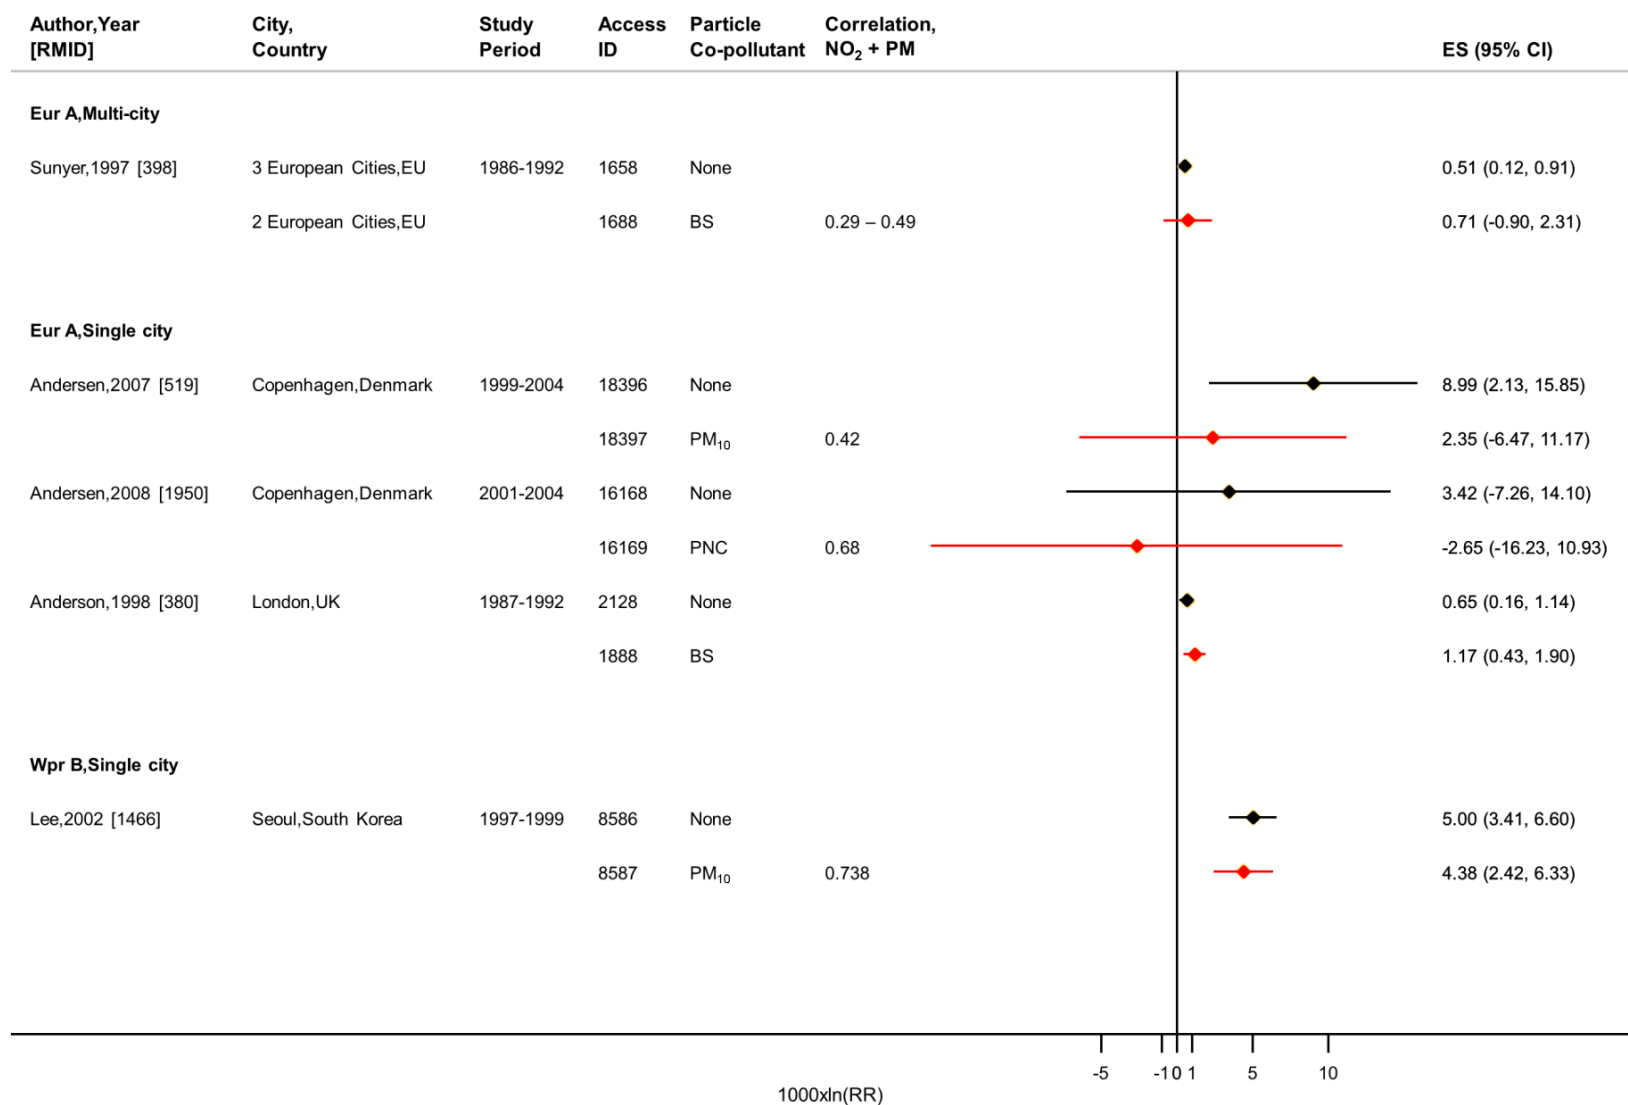

**Figure S17: Studies providing two-pollutant model estimates for meta-analysis for hospital admissions for asthma, various age groups, 24 hour NO<sub>2</sub>**

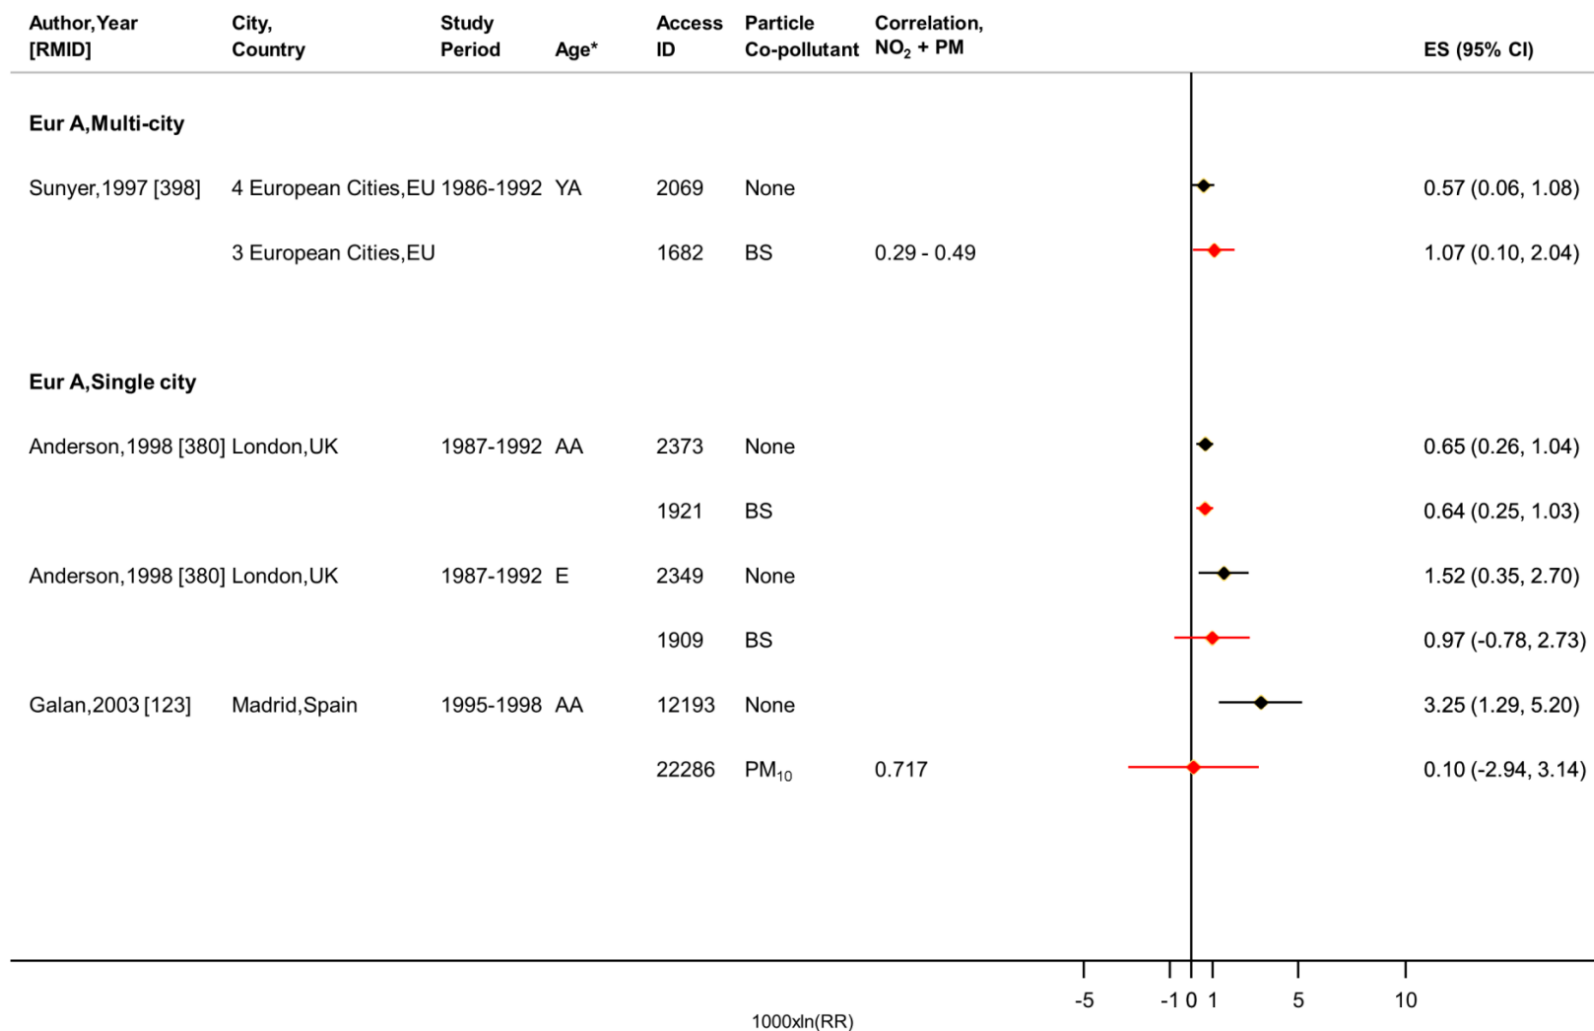

\* Age: AA = All-ages; E = Elderly; YA = Young adults



**Figure S18: Studies providing two-pollutant model estimates for meta-analysis for hospital admissions for cardiac disease, all-ages, 24 hour NO<sub>2</sub>**

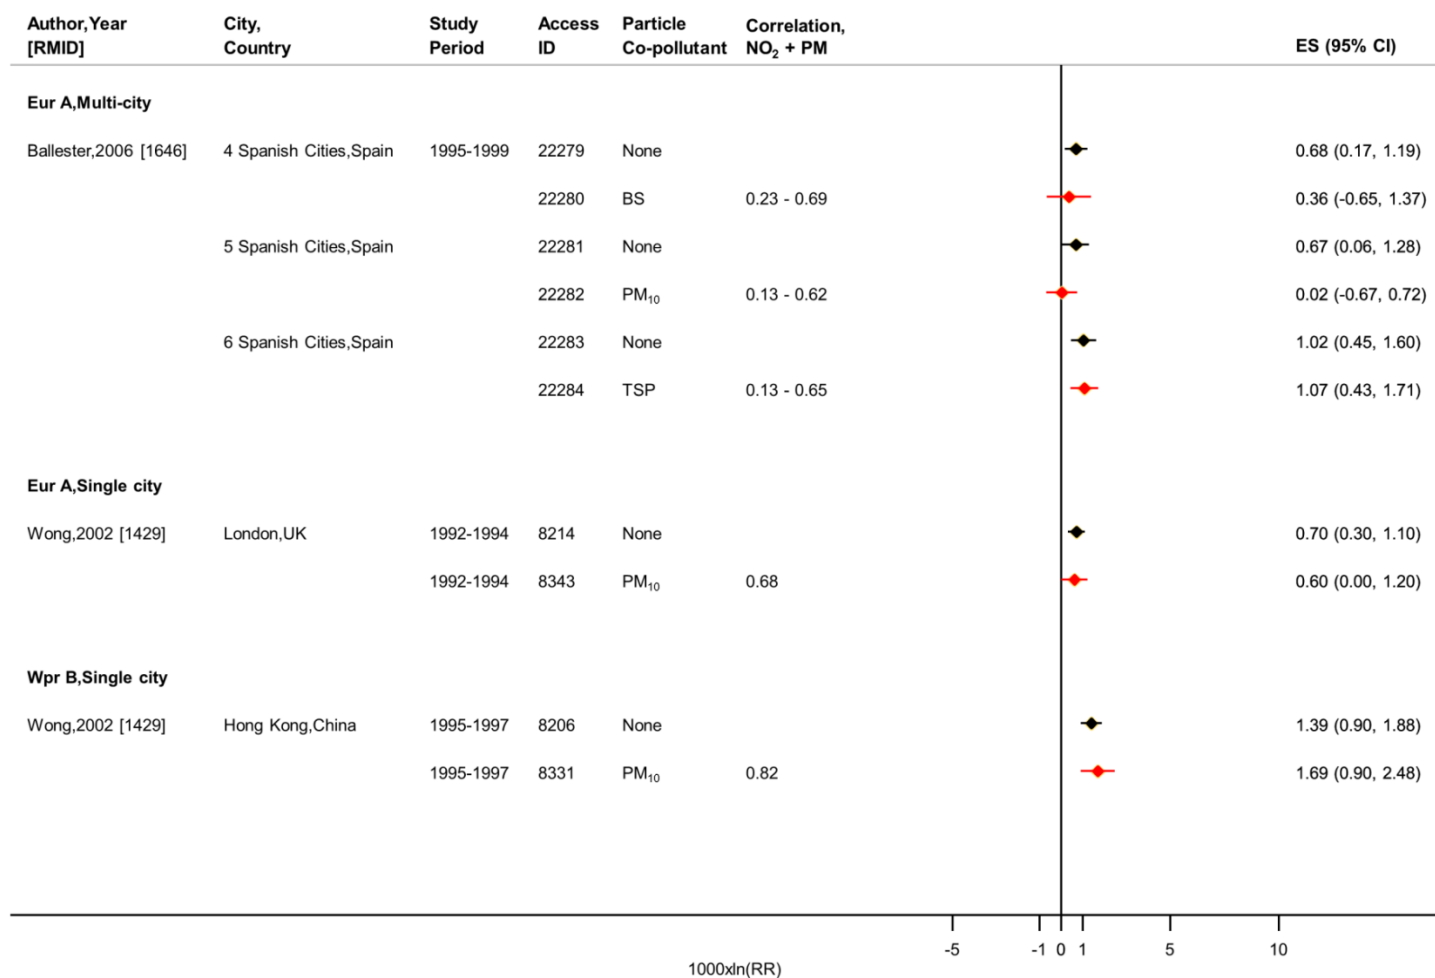

**Figure S19: Studies providing two-pollutant model estimates for meta-analysis for hospital admissions for cardiac disease, elderly, 24 hour NO<sub>2</sub>**

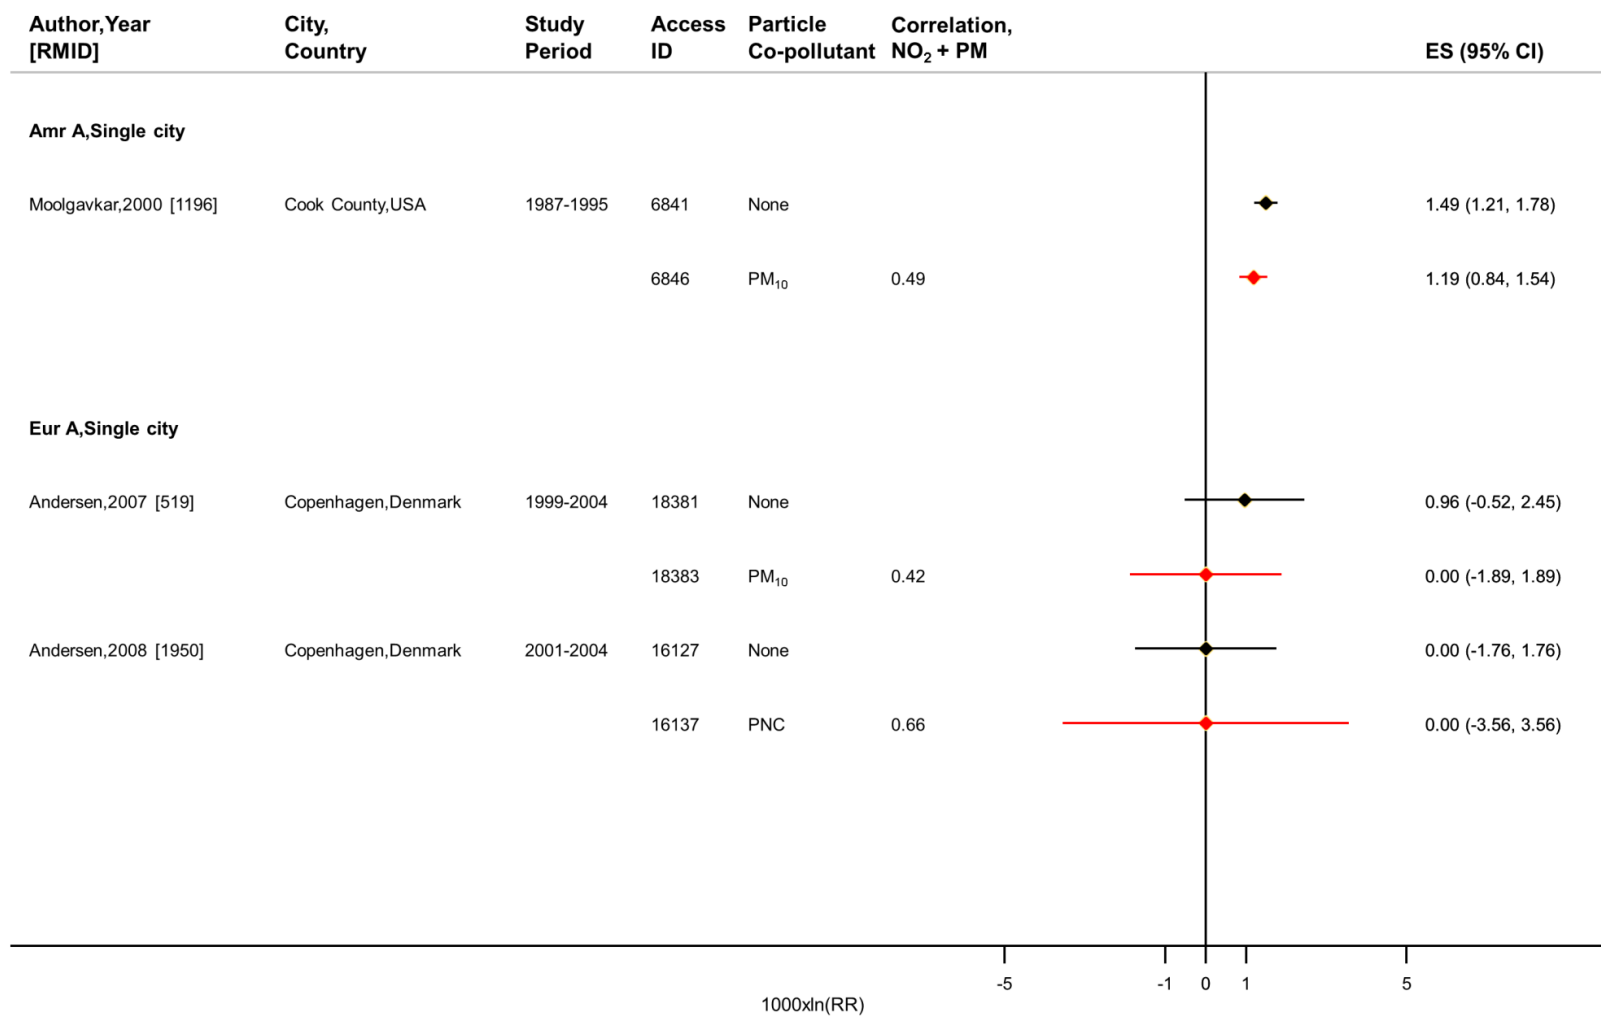

**Figure S20: All available studies providing estimates from both all-year and season-specific models for 24 hour NO<sub>2</sub> and all-cause mortality in all-ages**

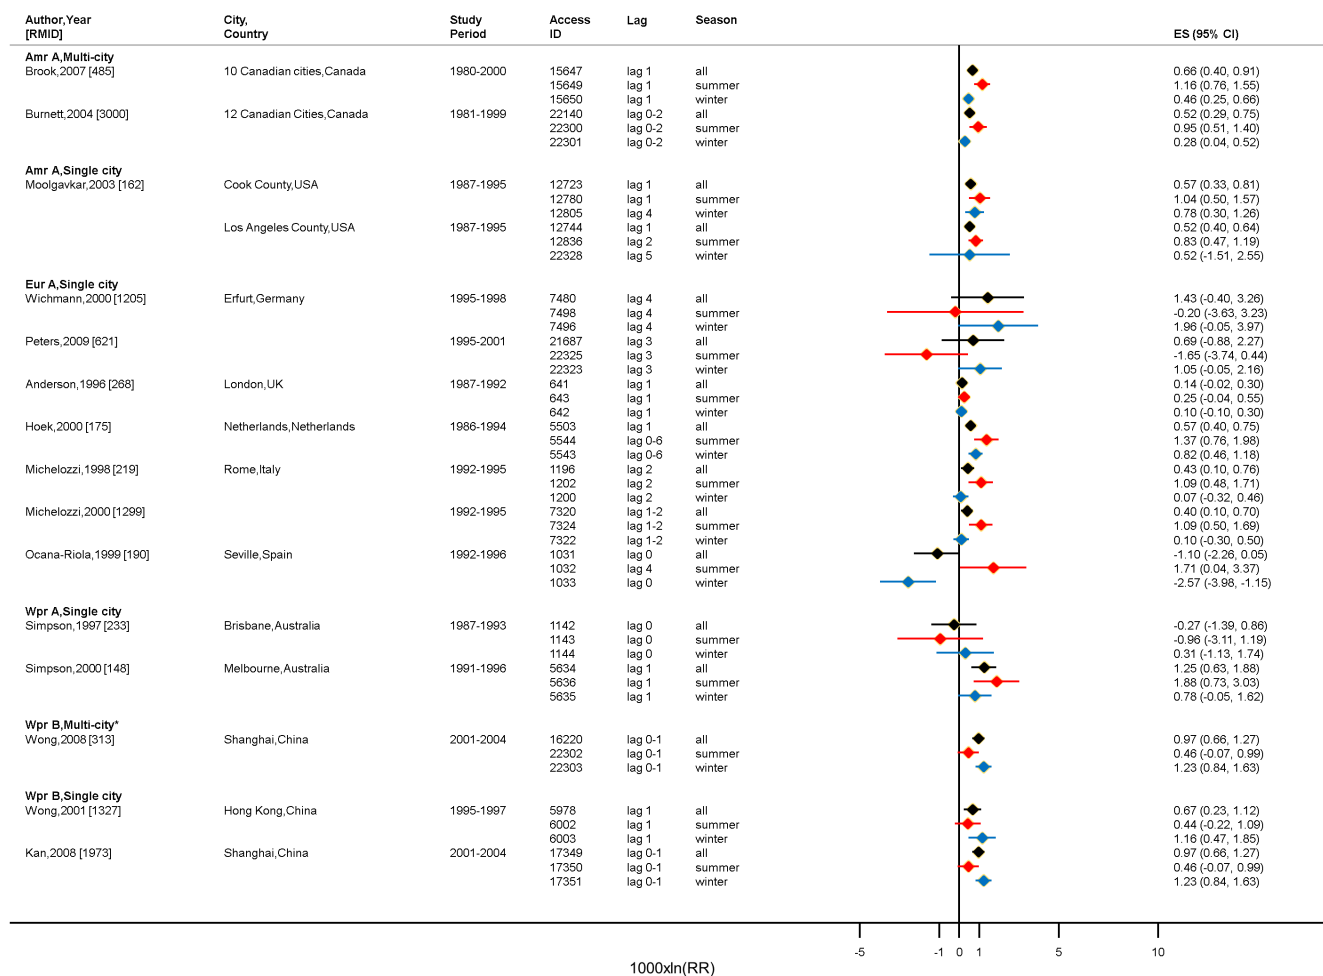

**Figure S21: All available studies providing estimates from both all-year and season-specific models for 24 hour NO<sub>2</sub> and all cardiovascular mortality in all ages**

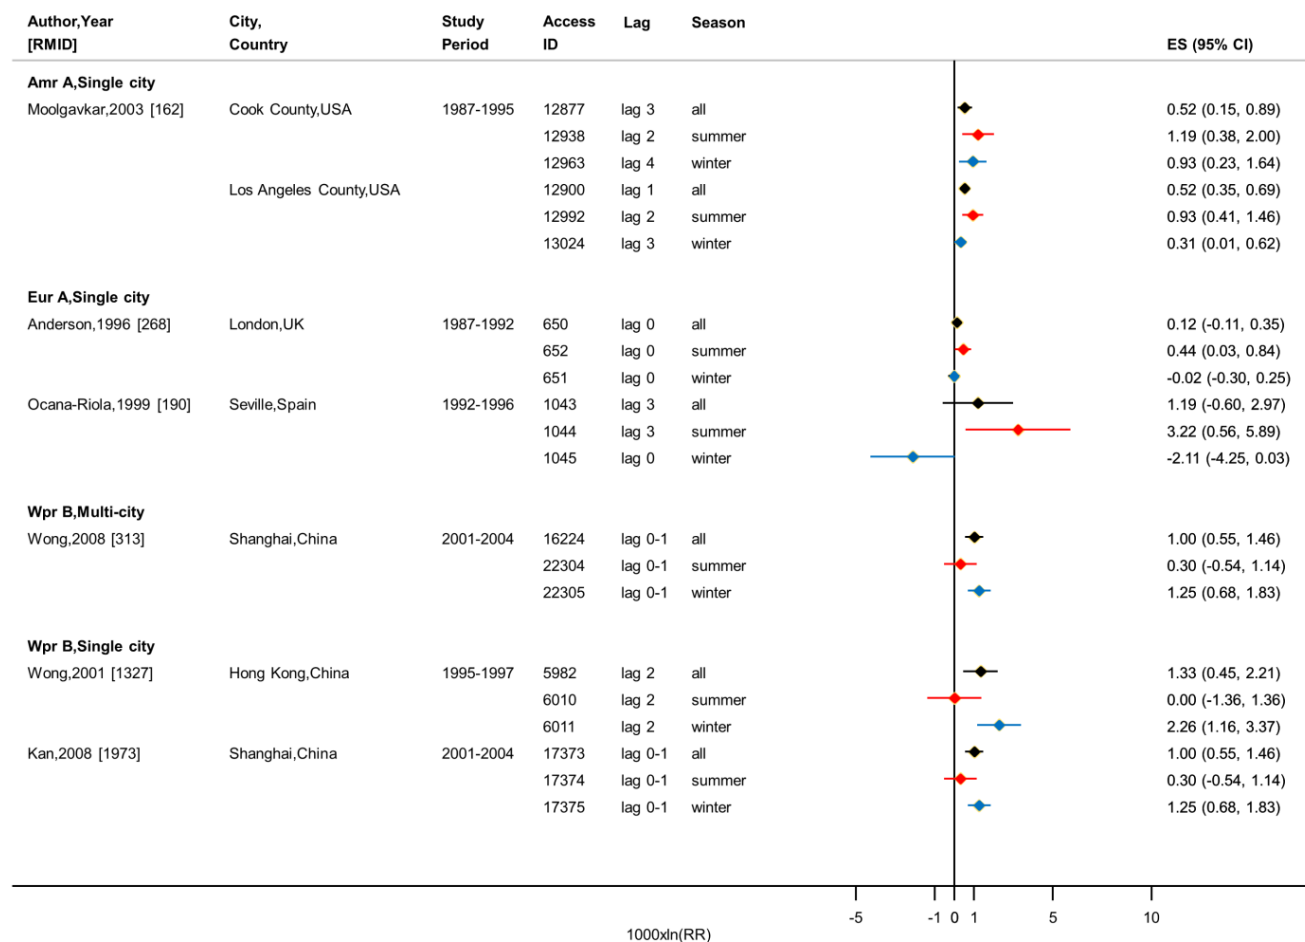

**Figure S22: All available studies providing estimates from both all-year and season-specific models for 24 hour NO<sub>2</sub> and all respiratory mortality in all-ages**

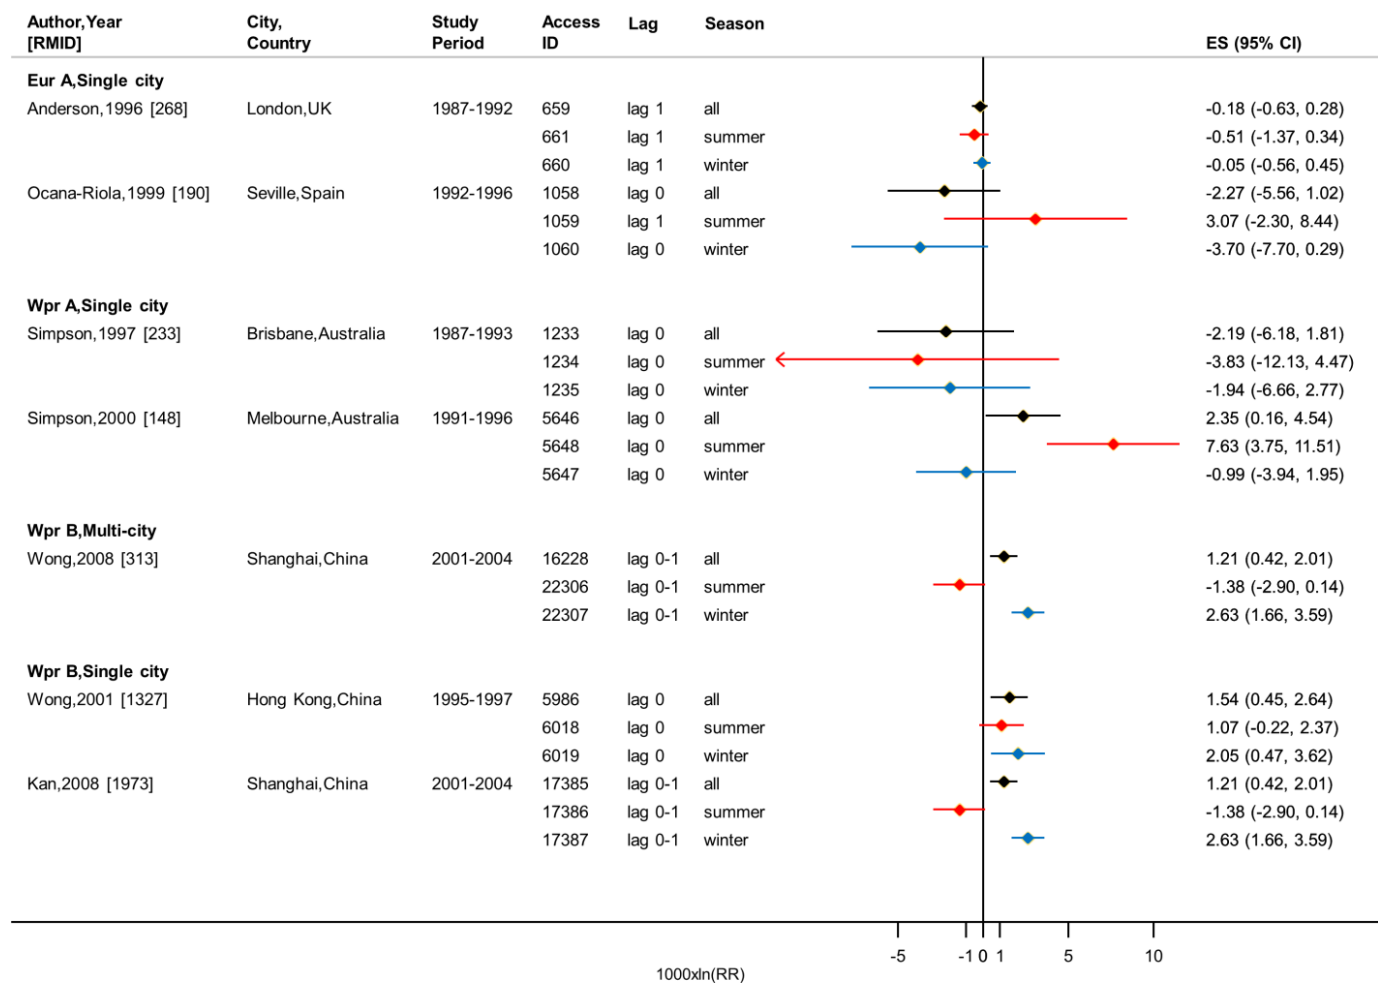

**Figure S23: All available studies providing estimates from both all-year and season-specific models for 24 hour NO<sub>2</sub> and all respiratory and all cardiovascular hospital admissions in all-ages**

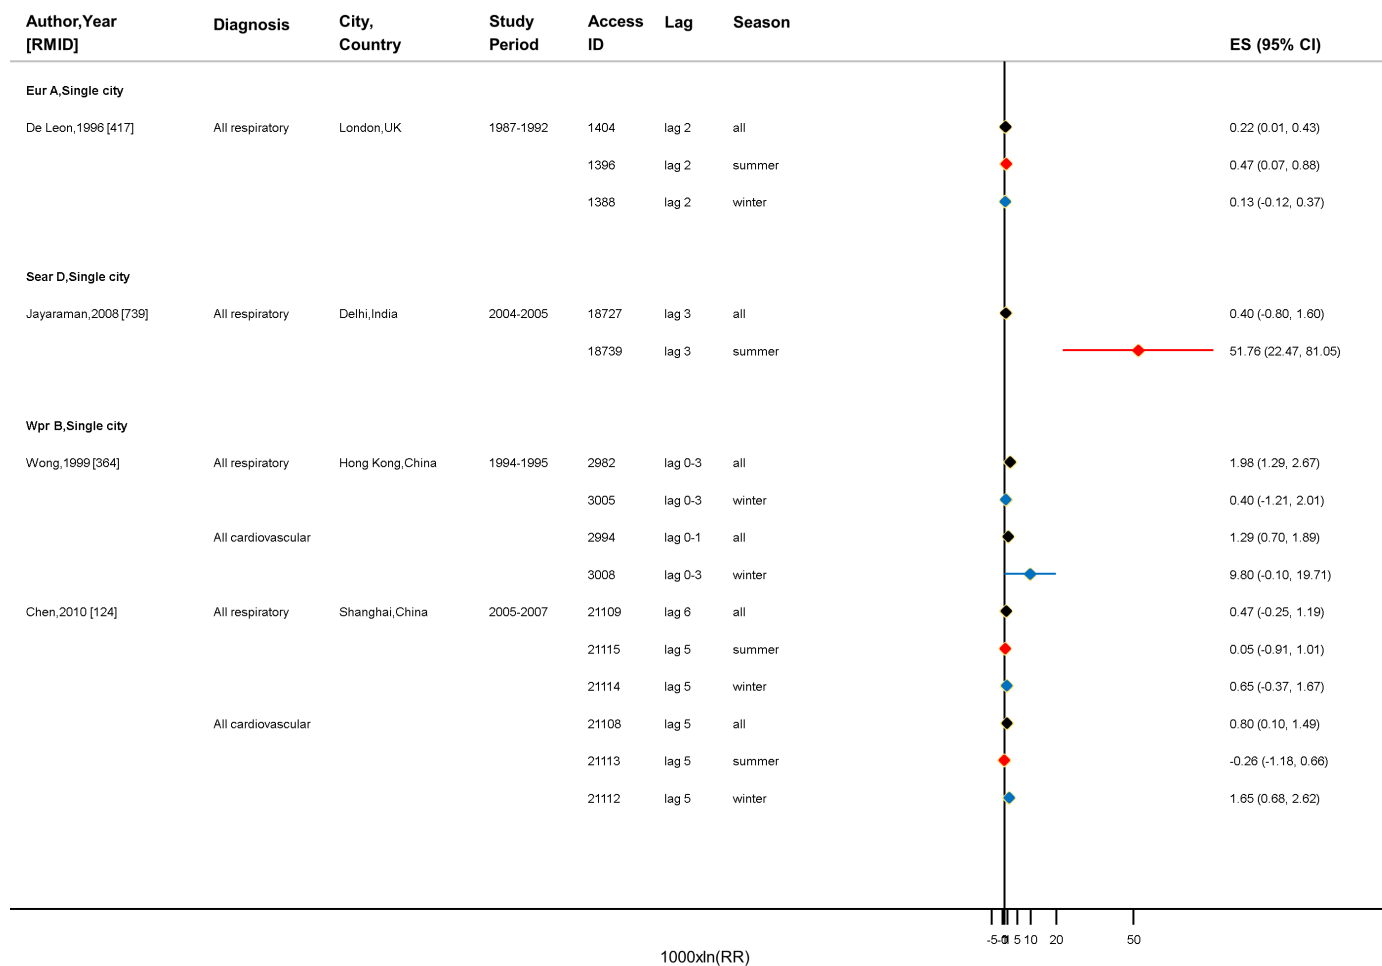

**Figure S24: Ranking of NO<sub>2</sub> estimates for all-cause mortality in all-ages by mean levels of 24 hour NO<sub>2</sub> (multi-city studies shown using black bars)**

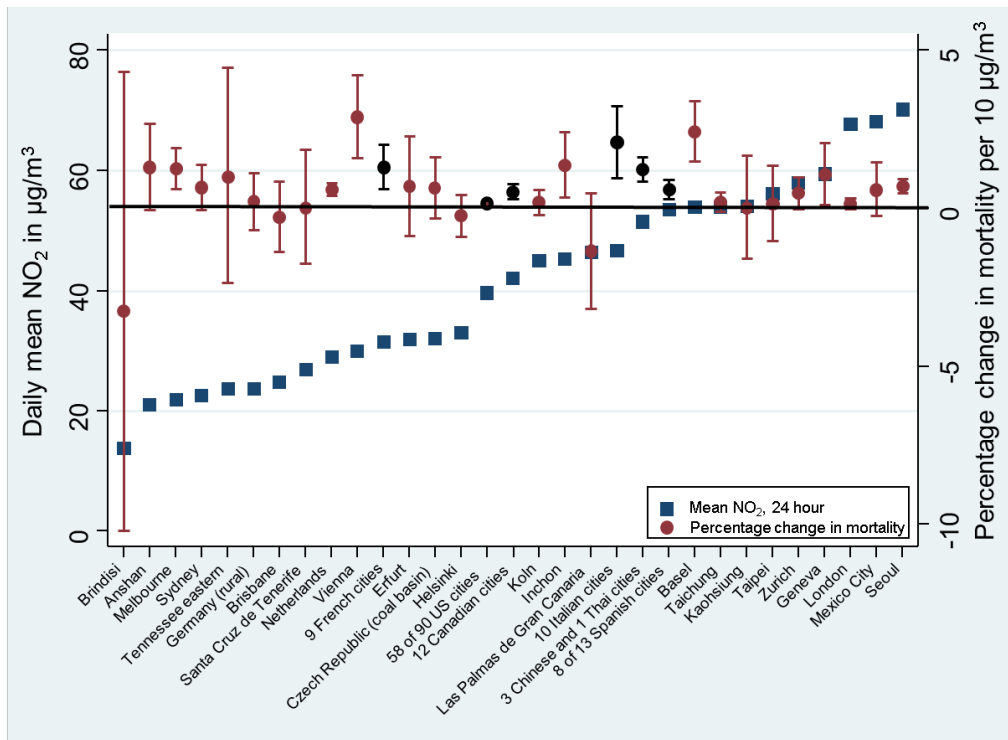

**Figure S25: Ranking of NO<sub>2</sub> estimates for all-cause mortality in all-ages by mean levels of PM<sub>10</sub> (multi-city studies shown using black bars)**

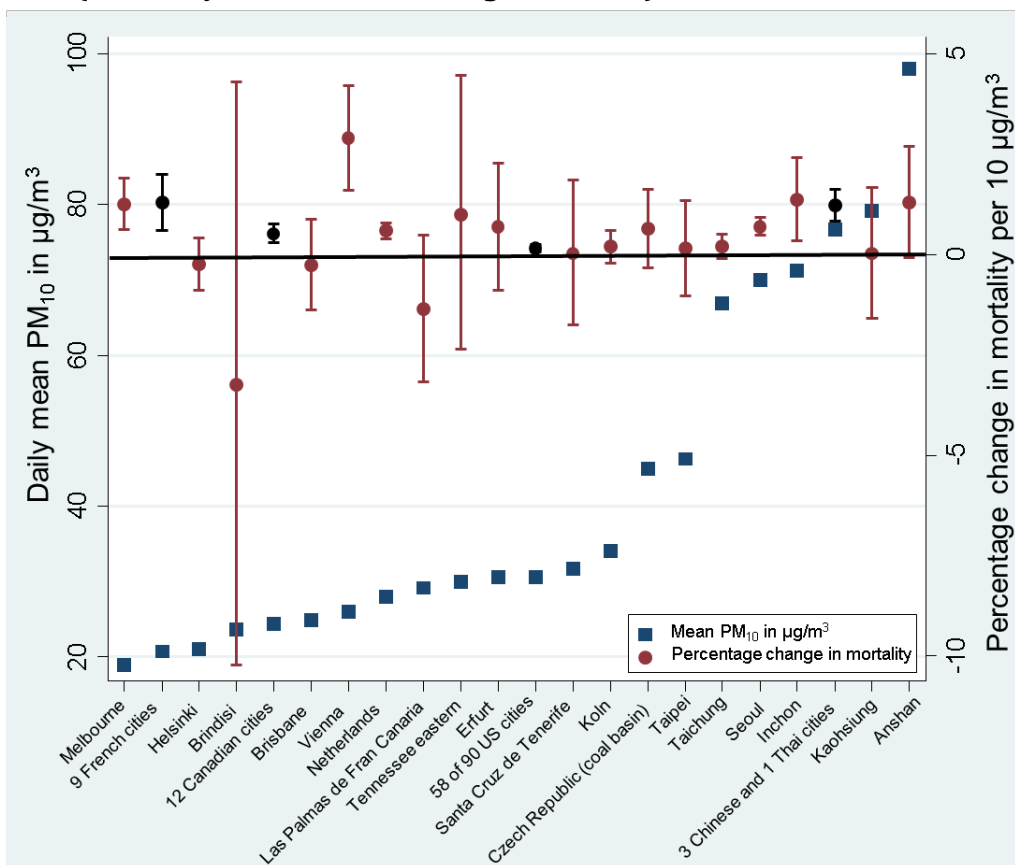

**Figure S26: Ranking of NO<sub>2</sub> estimates for all-cause mortality in all-ages by the NO<sub>2</sub>/PM<sub>10</sub> concentration ratio (multi-city studies shown using black bars)**

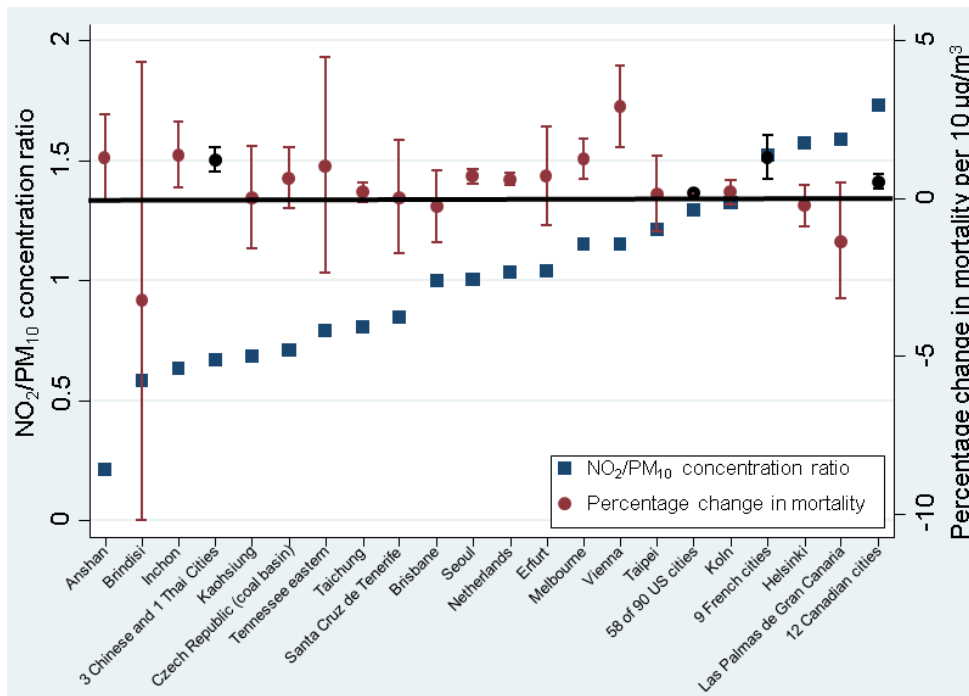

**Figure S27: Ranking of NO<sub>2</sub> estimates for all-cause mortality in all-ages by daily mean temperature (multi-city studies shown using black bars)**

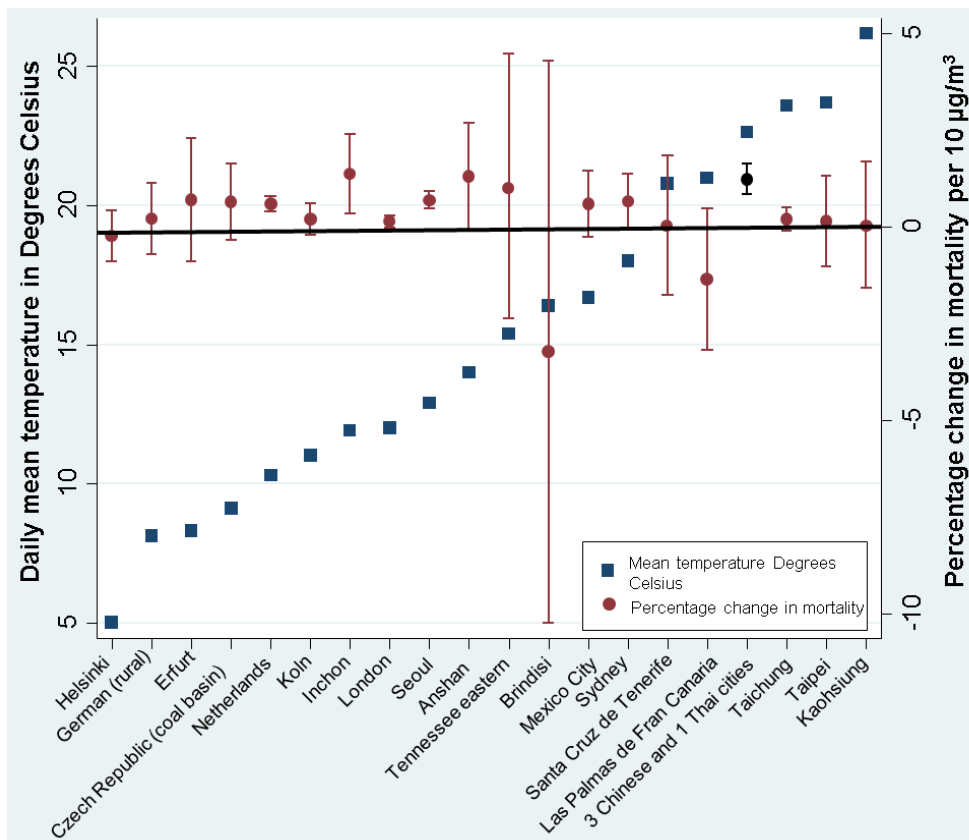



## Reference List

Listed in order of Reference Manager ID (RMID)

- (1) Ostro BD, Hurley S, Lipsett MJ. Air pollution and daily mortality in the Coachella Valley, California: A study of PM10 dominated by coarse particles. *Environ Res* 1999; 81(NO-3):231-238.  
RMID: 3
- (2) Kan H, Chen BC. Air pollution and daily mortality in Shanghai: A time-series study. *Arch Environ Health* 2003; 58(6):360-367.  
RMID: 76
- (3) Galan I, Tobias A, Banegas JR, Aranguiz E. Short-term effects of air pollution on daily asthma emergency room admissions. *Eur Respir J* 2003; 22(5):802-808.  
RMID: 123
- (4) Chen RJ, Chu C, Tan JG, Cao JS, Song WM, Xu XH et al. Ambient air pollution and hospital admission in Shanghai, China. *Journal of Hazardous Materials* 2010; 181(1-3):234-240.  
RMID: 124
- (5) Kan H, Jia J, Chen BH. Acute stroke mortality and air pollution: New evidence from Shanghai, China. *Journal of Occupational Health* 2003; 45(5):321-323.  
RMID: 130
- (6) Simpson R, Williams G, Petroeschovsky A, Best T, Morgan G, Denison L et al. The short-term effects of air pollution on daily mortality in four Australian cities. *Aust N Z J Public Health* 2005; 29(3):205-212.  
RMID: 133
- (7) Simpson R, Williams G, Petroeschovsky A, Best T, Morgan G, Denison L et al. The short-term effects of air pollution on hospital admissions in four Australian cities. *Aust N Z J Public Health* 2005; 29(3):213-221.  
RMID: 134
- (8) Burnett RT, Brook J, Dann T, Delocla C, Philips O, Cakmak S et al. Association between particulate- and gas-phase components of urban air pollution and daily mortality in eight Canadian cities. *Inhal Toxicol* 2000; 12:15-39.  
RMID: 135
- (9) Kan H, Jia J, Chen BH. The association of daily diabetes mortality and outdoor air pollution in Shanghai, China. *Journal of Environmental Health* 2004; 67(3):21-25.  
RMID: 150
- (10) Moolgavkar SH. Air pollution and daily mortality in two U. S. counties: Season-specific analyses and exposure-response relationships. *Inhal Toxicol* 2003; 15(9):877-907.  
RMID: 162
- (11) Moolgavkar SH. Air pollution and daily mortality in three US counties. *Environ Health Perspect* 2000; 108(8):777-784.  
RMID: 163
- (12) Hoek G, Brunekreef B, Verhoeff A, van Wijnen J, Fischer P. Daily mortality and air pollution in the Netherlands. *J Air Waste Manage Assoc* 2000; 50(8):1380-1389.  
RMID: 175

- (13) Chock DP, Winkler SL. A study of the association between daily mortality and ambient air pollutant concentrations in Pittsburgh, Pennsylvania. *J Air Waste Manage Assoc* 2000; 50(8):1481-1500.  
RMID: 177
- (14) Bremner SA, Anderson HR, Atkinson RW, McMichael AJ, Strachan DP, Bland JM et al. Short-term associations between outdoor air pollution and mortality in London 1992-4. *Occupational & Environmental Medicine* 1999; 56(4):237-244.  
RMID: 182
- (15) Gouveia N, Fletcher T. Respiratory diseases in children and outdoor air pollution in Sao Paulo, Brazil: a time series analysis. *Occupational & Environmental Medicine* 2000; 57(7):477-483.  
RMID: 207
- (16) Loomis DP, Castillejos M, Gold DR, McDonnell W, Borja-Aburto VH. Air pollution and infant mortality in Mexico City. *Epidemiol* 1999; 10(2):118-123.  
RMID: 210
- (17) Borja-Aburto VH, Castillejos M, Gold DR, Bierzwinski S, Loomis D. Mortality and ambient fine particles in southwest Mexico City, 1993-1995. *Environ Health Perspect* 1998; 106(12):849-855.  
RMID: 214
- (18) Michelozzi P, Forastiere F, Fusco D, Perucci CA, Ostro B, Ancona C et al. Air pollution and daily mortality in Rome, Italy. *Occupational & Environmental Medicine* 1998; 55(9):605-610.  
RMID: 219
- (19) Farhat SCL, Paulo RLP, Shimoda TM, Conceicao GMS, Lin CA, Braga ALF et al. Effect of air pollution on pediatric respiratory emergency room visits and hospital admissions. *Brazilian Journal of Medical and Biological Research* 2005; 38(2):227-235.  
RMID: 235
- (20) Kelsall JE, Samet JM, Zeger SL, Xu J. Air pollution and mortality in Philadelphia, 1974-1988. *Am J Epidemiol* 1997; 146(9):750-762.  
RMID: 236
- (21) Touloumi G, Katsouyanni K, Zmirou D, Schwartz J, Spix C, De Leon AP et al. Short-term effects of ambient oxidant exposure on mortality: a combined analysis within the APHEA project. *Air Pollution and Health: a European Approach. Am J Epidemiol* 1997; 146(2):177-185.  
RMID: 240
- (22) Ostro BD, Sanchez JM, Aranda C, Eskeland GS. Air pollution and mortality: results from a study of Santiago, Chile. *J Expo Anal Environ Epidemiol* 1996; 6(1):97-114.  
RMID: 256
- (23) Wong CM, Vichit-Vadakan N, Kan HD, Qian ZM. Public Health and Air Pollution in Asia (PAPA): A multicity study of short-term effects of air pollution on mortality. *Environ Health Perspect* 2008; 116(9):1195-1202.  
RMID: 313

- (24) Kan H, Jia J, Chen B. A time-series study on the association of stroke mortality and air pollution in Zhabei, Shanghai. *Journal of Hygiene Research* 2006; 33(1):36-38.  
RMID: 349
- (25) Anderson HR, Ponce dL, Bland JM, Bower JS, Emberlin J, Strachan DP. Air pollution, pollens, and daily admissions for asthma in London 1987- 92. *Thorax* 1998; 53(10):842-848.  
RMID: 380
- (26) Sunyer J, Spix C, Quenel P, Ponce-de-Leon A, Barumandzadeh T, Touloumi G et al. Urban air pollution and emergency admissions for asthma in four European cities: The APHEA project. *Thorax* 1997; 52(9):760-765.  
RMID: 398
- (27) Brook JR, Burnett RT, Dann TF, Cakmak S, Goldberg MS, Fan XH et al. Further interpretation of the acute effect of nitrogen dioxide observed in Canadian time-series studies. *Journal of Exposure Science and Environmental Epidemiology* 2007; 17:S36-S44.  
RMID: 485
- (28) Andersen ZJ, Wahlin P, Raaschou-Nielsen O, Scheike T, Loft S. Ambient particle source apportionment and daily hospital admissions among children and elderly in Copenhagen. *Journal of Exposure Science and Environmental Epidemiology* 2007; 17(7):625-636.  
RMID: 519
- (29) Peters A, Breitner S, Cyrys J, Stolzel M, Pitz M, Wolke G et al. The influence of improved air quality on mortality risks in Erfurt, Germany. *Research Report - Health Effects Institute [137]*, 5-77. 2009.  
Ref Type: Report  
RMID: 621
- (30) Samoli E, Nastos PT, Paliatsos AG, Katsouyanni K, Priftis KN. Acute effects of air pollution on pediatric asthma exacerbation: Evidence of association and effect modification. *Environ Res* 2011; 111(3):418-424.  
RMID: 872
- (31) Hagen JA, Nafstad P, Skrondal A, Bjorkly S, Magnus P. Associations between outdoor air pollutants and hospitalization for respiratory diseases. *Epidemiol* 2000; 11(2):136-140.  
RMID: 1071
- (32) Cifuentes L, Vega J, Kopfer K, Lava LB. Effect of the fine fraction of particulate matter versus the coarse mass and other pollutants on daily mortality in Santiago, Chile. *J Air Waste Manage Assoc* 2000; 50(8):1287-1298.  
RMID: 1152
- (33) Ballester F, Tenias JM, Perez-Hoyos S. Air pollution and emergency hospital admissions for cardiovascular diseases in Valencia, Spain. *J Epidemiol Community Health* 2001; 55(1):57-65.  
RMID: 1184
- (34) Moolgavkar SH. Air pollution and hospital admissions for diseases of the circulatory system in three US metropolitan areas. *J Air Waste Manage Assoc* 2000; 50(7):1199-1206.  
RMID: 1196

- (35) Wichmann HE, Spix C, Tuch T, Wolke G, Peters A, Heinrich J et al. Daily Mortality and Fine and Ultrafine Particles in Erfurt, Germany Part I: Role of Particle Number and Particle Mass. 98. 2000. Health Effects Institute.  
Ref Type: Report  
RMID: 1205
- (36) Zeghnoun A, Czernichow P, Beaudeau P, Hautemaniere A, Froment L, Le Tertre A et al. Short-term effects of air pollution on mortality in the cities of Rouen and Le Havre, France, 1990-1995. *Arch Environ Health* 2001; 56(4):327-335.  
RMID: 1374
- (37) Wong CM, Atkinson RW, Anderson HR, Hedley AJ, Ma S, Chau PYK et al. A tale of two cities: Effects of air pollution on hospital admissions in Hong Kong and London compared. *Environ Health Perspect* 2002; 110(1):67-77.  
RMID: 1429
- (38) Hong Y-C, Lee J-T, Kim H, Kwon H-J. Air pollution: A new risk factor in ischemic stroke mortality. *Stroke* 2002; 33(9):2165-2169.  
RMID: 1448
- (39) Lee JT, Kim H, Song HY, Hong YC, Cho YS, Shin SY et al. Air pollution and asthma among children in Seoul, Korea. *Epidemiol* 2002; 13(4):481-484.  
RMID: 1466
- (40) D'Ippoliti D, Forastiere F, Ancona C, Agabiti N, Fusco D, Michelozzi P et al. Air pollution and myocardial infarction in Rome - A case- crossover analysis. *Epidemiol* 2003; 14(5):528-535.  
RMID: 1509
- (41) Kan HD, Chen BH. A case-crossover analysis of air pollution and daily mortality in Shanghai. *Journal of Occupational Health* 2003; 45(2):119-124.  
RMID: 1531
- (42) Oftedal B, Nafstad P, Magnus P, Bjorkly S, Skrondal A. Traffic related air pollution and acute hospital admission for respiratory diseases in Drammen, Norway 1995-2000. *Eur J Epidemiol* 2003; 18(7):671-675.  
RMID: 1556
- (43) Lee JT, Kim H, Cho YS, Hong YC, Ha EH, Park H. Air pollution and hospital admissions for ischemic heart diseases among individuals 64+years of age residing in Seoul, Korea. *Arch Environ Health* 2003; 58(10):617-623.  
RMID: 1622
- (44) Yang QY, Chen Y, Krewski D, Burnett RT, Shi YL, McGrail KM. Effect of short-term exposure to low levels of gaseous pollutants on chronic obstructive pulmonary disease hospitalizations. *Environ Res* 2005; 99(1):99-105.  
RMID: 1638
- (45) Kwon H-J, Cho S-H. Air pollution and daily mortality in Seoul. *Korean Journal of Preventative Medicine* 1999; 32(2):191-199.  
RMID: 1643
- (46) Chang JH, et al. Effect of air pollution on daily clinic treatments for respiratory cardiovascular disease in central Taiwan, 1997-1999. *Zhonghua Occupational Medicine*

Journal 2002; 9(2):111-120.  
RMID: 1645

- (47) Ballester F, Rodriguez P, Iniguez C, Saez M, Daponte A, Galan I et al. Air pollution and cardiovascular admissions association in Spain: results within the EMECAS project. *J Epidemiol Community Health* 2006; 60(4):328-336.  
RMID: 1646
- (48) Samoli E, Aga E, Touloumi G, Nislotis K, Forsberg B, Lefranc A et al. Short-term effects of nitrogen dioxide on mortality: an analysis within the APHEA project. *Eur Respir J* 2006; 27(6):1129-1137.  
RMID: 1671
- (49) Wellenius GA, Bateson TF, Mittleman MA, Schwartz J. Particulate air pollution and the rate of hospitalization for congestive heart failure among Medicare beneficiaries in Pittsburgh, Pennsylvania. *Am J Epidemiol* 2005; 161(11):1030-1036.  
RMID: 1924
- (50) Qian Z, He Q, Lin HM, Kong L, Liao D, Yang N et al. Short-term effects of gaseous pollutants on cause-specific mortality in Wuhan, China. *J Air Waste Manag Assoc* 2007; 57(7):785-793.  
RMID: 1945
- (51) Andersen ZJ, Wahlin P, Raaschou-Nielsen O, Ketzel M, Scheike T, Loft S. Size distribution and total number concentration of ultrafine and accumulation mode particles and hospital admissions in children and the elderly in Copenhagen, Denmark. *Occup Environ Med* 2008; 65(7):458-466.  
RMID: 1950
- (52) Breitner S, Stolzel M, Cyrys J, Pitz M, Wolke G, Kreyling W et al. Short-Term Mortality Rates during a Decade of Improved Air Quality in Erfurt, Germany. *Environ Health Perspect* 2009; 117(3):448-454.  
RMID: 1954
- (53) Chen GH, Song GX, Jiang LL, Zhang YH, Zhao NQ, Chen BH et al. Short-term effects of ambient gaseous pollutants and particulate matter on daily mortality in Shanghai, China. *Journal of Occupational Health* 2008; 50(1):41-47.  
RMID: 1956
- (54) Ren YJ, Li XY, Chen K, Liu QM, Xiang HQ, Jin DF et al. [A case-crossover study on air pollutants and the mortality of stroke]. *Zhonghua Liu Xing Bing Xue Za Zhi = Zhonghua Liuxingbingxue Zazhi* 2008; 29(9):878-881.  
RMID: 2001
- (55) Barnett AG, Williams GM, Schwartz J, Neller AH, Best TL, Petroeschevsky AL et al. Air pollution and child respiratory health - A case-crossover study in Australia and new Zealand. *American Journal of Respiratory and Critical Care Medicine* 2005; 171(11):1272-1278.  
RMID: 2039
- (56) Lin M, Stieb DM, Chen Y. Coarse particulate matter and hospitalization for respiratory infections in children younger than 15 years in Toronto: A case-crossover analysis. *Pediatrics* 2005; 116(2):E235-E240.  
RMID: 2040

- (57) Chen RJ, Pan GW, Kan HD, Tan JG, Song WM, Wu ZY et al. Ambient air pollution and daily mortality in Anshan, China: A time-stratified case-crossover analysis. *Science of the Total Environment* 2010; 408(24):6086-6091.  
RMID: 2052
- (58) Park AK, Hong YC, Kim H. Effect of changes in season and temperature on mortality associated with air pollution in Seoul, Korea. *J Epidemiol Community Health* 2011; 65(4):368-375.  
RMID: 2067
- (59) Burnett RT, Stieb D, Brook JR, Cakmak S, Dales R, Raizenne M, Vincent R, Dann T. Associations between short-term changes in nitrogen dioxide and mortality in Canadian cities. *Arch Environ Health*. 2004; 59(5):228-36.  
RMID: 3000
- (60) HEI Public Health and Air Pollution in Asia Program. (2010) Public Health and Air Pollution in Asia (PAPA): Coordinated Studies of Short-Term Exposure to Air Pollution and Daily Mortality in Four Cities. HEI Research Report 154. Health Effects Institute, Boston, MA.  
RMID: 3003

## APPENDIX 1

### Update literature search and commentary

In May 2015, BMJ Open published our systematic review and meta-analysis in which we demonstrated that short-term exposure to NO<sub>2</sub> is associated with mortality and hospital admissions for cardiovascular and respiratory diseases in different age groups (doi:10.1136/bmjopen-2014-006946). Whether the NO<sub>2</sub> associations are independent of the effects of particulate matter (PM) is the subject of the current manuscript under consideration by BMJ Open. The manuscript builds upon our earlier paper and forms the second part of our two-part study. Both parts of the study are based on a literature search with a cut-off of May 2011.

During the peer-review of the first (already published) paper, we faced criticisms regarding our literature cut-off similar to those made about the second manuscript. At that time, we addressed the points by undertaking a *partial* update of the literature:

- (i) using the same search string
- (ii) searching only one (of three) bibliographic databases – PubMed
- (iii) focusing only on papers published in the English language
- (iv) focusing on the period from 1<sup>st</sup> April 2011 to 26<sup>th</sup> July 2014, the date of the search

After applying the same inclusion criteria, we identified 37 studies of all-year NO<sub>2</sub>.

To address the latest comments regarding the literature cut-off, we re-examined the 37 studies to:

- (i) identify papers which reported estimates of NO<sub>2</sub> adjusted for a metric of PM
- (ii) assess how the adjusted estimates compare with the results of our study
- (iii) determine whether the papers published since our cut-off alter the messages in our manuscript.

Twelve of the 37 studies (that is 32%) reported numerical estimates of NO<sub>2</sub> adjusted for a metric of PM: see reference list. Table 1 provides an overview of the data, by outcome, diagnosis, averaging time, multi-city status of the study and location in which the study was conducted. Table 2 summarises the quantitative results of each study, and the paragraphs which follow provide commentary on the information presented in the tables.

Seven studies examined mortality outcomes whilst five examined hospital admissions. Eleven studies used 24 hour average NO<sub>2</sub> and the majority of the studies used PM<sub>10</sub> to control for the effects of particles. These findings are in keeping with our manuscript: (i) 29% of the studies published up to May 2011 reported estimates of NO<sub>2</sub> adjusted for PM; (ii) 67% of the studies used PM<sub>10</sub> to control for the effects of particles. Table 1 also shows that six of the 12 studies used a multi-city design and the majority of the new data comes from the Western Pacific Region B, which includes China. The growth in studies from this region of the world was identified in our review and cities in this region are represented in our meta-analytic estimates.

Many of the new studies include locations which are represented in our meta-analyses and there is also some overlap in study time periods between studies included in our review and newly published evidence. Some of the new studies are however based on a larger number of cities from a particular country, but also include cities represented in our meta-analyses (Moolgavkar et al, 2013; Chen et al, 2012). Chiusolo et al (2011) report further analyses of

existing data. Only one single-city study provided data for a less well studied part of the world: Ho Chi Minh city, Vietnam (HEI, 2012).

The results of the studies presented in Table 2 indicate that, in general, the associations between NO<sub>2</sub> and mortality and hospital admissions remain after control for PM and support an independent effect of NO<sub>2</sub> (adjusted for PM). This is in keeping with the key findings of our manuscript, and does not alter the conclusions of our review of studies published up to May 2011. Whilst we acknowledge that a more up-to-date review is desirable, it would be unlikely to significantly alter the relevance or importance of our review. To our knowledge, no quantitative systematic review of the two-/multi-pollutant model estimates of NO<sub>2</sub> has been published since 2002 (Stieb et al), and this was only for all-cause mortality. Since then, the evidence of adverse effects of NO<sub>2</sub> has increased and strengthened. Our analyses therefore contribute new quantitative evidence to the science-policy debate, indicating that NO<sub>2</sub> is associated with adverse health outcomes independently of PM (measured mainly as PM<sub>10</sub>, PM<sub>2.5</sub>, and Black Smoke). Table 2 also shows that the estimates of PM are more sensitive to control for NO<sub>2</sub> in joint models than the estimates of NO<sub>2</sub> are. This observation provides some support for the findings in our manuscript, and, as discussed in our manuscript, is an issue which warrants further investigation.

The resources required to undertake a detailed systematic ascertainment and quantitative meta-analysis of the growing time-series literature limits the ability of our systematic review to incorporate the very latest published evidence. Further work would be required to search additional databases (as was done in our manuscript), sift and translate relevant foreign language papers (also done for our review), enter quantitative estimates in our database, and apply our estimate selection protocol before judgements could be made about the specific meta-analyses that would or would not need to be updated in light of the new evidence. Furthermore, as the current manuscript builds upon our earlier paper and forms the second part of our two-part study, it is desirable to base the two papers on the same literature cut-off to enable comparison of results.



**Table 1: Summary of time-series studies of daily NO<sub>2</sub> and mortality or hospital admissions published since May 2011**

| Outcome                       |                   | Total     |                    | Multi-city study |                    | Single-city study |                    |
|-------------------------------|-------------------|-----------|--------------------|------------------|--------------------|-------------------|--------------------|
|                               |                   | Mortality | Hospital admission | Mortality        | Hospital admission | Mortality         | Hospital admission |
| <b>Total</b>                  |                   | 7         | 5                  | 4                | 2                  | 3                 | 3                  |
| <b>Disease<sup>a</sup></b>    | Respiratory       | 3         | 3                  | 2                | 1                  | 1                 | 2                  |
|                               | Cardiovascular    | 4         | 2                  | 3                | 1                  | 1                 | 1                  |
|                               | All-cause         | 5         |                    | 2                |                    | 2                 |                    |
| <b>WHO Region<sup>b</sup></b> | American A        | 1         |                    | 1                |                    |                   |                    |
|                               | European A        | 1         | 4                  | 1                | 2                  |                   | 2                  |
|                               | Western Pacific B | 5         |                    | 2                |                    | 3                 |                    |
|                               | American B        |           |                    |                  |                    |                   |                    |
|                               | Western Pacific A |           |                    |                  |                    |                   |                    |
|                               | South East Asia B |           | 1                  |                  |                    |                   | 1                  |
| <b>Averaging time</b>         | 24 hours          | 7         | 4                  | 4                | 1                  | 3                 | 3                  |
|                               | Maximum 1 hour    |           | 1                  |                  | 1                  |                   |                    |
|                               | Other             |           |                    |                  |                    |                   |                    |

a - Respiratory includes all-respiratory diseases, asthma, COPD only, COPD (including asthma), lower respiratory infections, and upper respiratory diseases; Cardiovascular includes all-cardiovascular diseases, cardiac disease, heart failure, ischaemic heart disease, dysrhythmia, and stroke.

b - WHO regions: A: very low child and adult mortality; B: low child mortality and low adult mortality; C: low child mortality and high adult mortality; D: high child mortality and high adult mortality. A list of countries which form part of each WHO region is given in the online supplementary material.

**Table 2: Summary of results of time-series studies of mortality and hospital admissions reporting estimates of NO<sub>2</sub> adjusted for a metric of PM.**

| Author (year)<br>Study location<br>Study period                                               | Outcome<br>Diagnosis<br>Age group                                | NO <sub>2</sub> effect estimate<br>(95% confidence interval)                                   |                                                      | Correlation<br>NO <sub>2</sub> /PM                                                                 | PM effect estimate<br>(95% confidence interval)                                                        |                              |
|-----------------------------------------------------------------------------------------------|------------------------------------------------------------------|------------------------------------------------------------------------------------------------|------------------------------------------------------|----------------------------------------------------------------------------------------------------|--------------------------------------------------------------------------------------------------------|------------------------------|
|                                                                                               |                                                                  | Single-pollutant                                                                               | Adjusted for PM                                      |                                                                                                    | Single-pollutant                                                                                       | Adjusted for NO <sub>2</sub> |
| <b>Bhaskaran et al (2011)</b><br>15 conurbations in England<br>and Wales<br>2003-06           | Hospital admissions<br>Myocardial infarction<br>Adults / Elderly | 1.1% (0.3, 1.8) per<br>10 µg/m <sup>3</sup> NO <sub>2</sub><br>Lag 1-6 hours<br>Hourly average | 0.8% (0, 1.6)<br>adjusted for PM <sub>10</sub>       | NO <sub>2</sub> /PM <sub>10</sub><br>0.48                                                          | 1.2% (0.3, 2.1) per 10<br>µg/m <sup>3</sup> PM <sub>10</sub><br>Lag 1-6 hours<br>Hourly averaging time | 0.8% (-0.1, 1.8)             |
| <b>Chen et al (2013a)</b><br>8 Chinese cities<br>1996-2008, years varied<br>across the cities | Mortality<br>Stroke (ICD10 I60-69)<br>All ages                   | 1.47% (0.88, 2.06)<br>per 10 µg/m <sup>3</sup> NO <sub>2</sub><br>Lag 0-1<br>24 hour average   | 1.17% (0.47, 1.88)<br>adjusted for PM <sub>10</sub>  | PM <sub>10</sub> /SO <sub>2</sub> /NO <sub>2</sub><br>across cities<br>ranged from<br>0.51 to 0.87 | 0.54% (0.28, 0.81)<br>per 10 µg/m <sup>3</sup> PM <sub>10</sub><br>Lag 0-1<br>24 hour average          | 0.14% (-0.04, 0.31)          |
| <b>Chen et al (2013b)</b><br>Shanghai<br>2001-2008                                            | Mortality<br>All-cause (ICD10 A00-<br>99)<br>All ages            | 0.66% (0.47, 0.86)<br>per 10 µg/m <sup>3</sup> NO <sub>2</sub><br>Lag 0<br>24 hour average     | 0.81% (0.53, 1.11)<br>adjusted for PM <sub>10</sub>  | None reported                                                                                      | 0.15% (0.07, 0.23)<br>per 10 µg/m <sup>3</sup> PM <sub>10</sub> Lag<br>0<br>24 hour average            | -0.08% (-0.2, 0.04)          |
| <b>Chen et al (2012)</b><br>17 Chinese cities<br>1996-2010, years varied<br>across the cities | Mortality<br>All-cause (ICD10 A00-<br>99)<br>All ages            | 1.63% (1.09, 2.17)<br>per 10 µg/m <sup>3</sup> NO <sub>2</sub><br>Lag 0-1<br>24 hour average   | 1.28% (0.72, 1.84)<br>adjusted for PM <sub>10</sub>  | NO <sub>2</sub> /PM <sub>10</sub><br>0.66                                                          | 0.35% (0.18, 0.52)<br>per 10 µg/m <sup>3</sup> PM <sub>10</sub> Lag<br>0-1<br>24 hour average          | 0.16% (0.00, 0.32)           |
|                                                                                               | Mortality<br>All cardiovascular (I90-<br>99)<br>All ages         | 1.80% (1.00, 2.59)                                                                             | 1.19% (0.30, 2.08)<br>adjusted for PM <sub>10</sub>  |                                                                                                    | 0.44% (0.23, 0.64)                                                                                     | 0.23% (0.03, 0.43)           |
|                                                                                               | Mortality<br>All respiratory (J00-98)<br>All ages                | 2.52% (1.44, 3.59)                                                                             | 1.75% (0.76, 2.75)<br>adjusted for PM <sub>10</sub>  |                                                                                                    | 0.56% (0.31, 0.81)                                                                                     | 0.24% (0.00, 0.49)           |
| <b>Chiusolo et al (2011)</b><br>10 Italian cities<br>2001-2005                                | Mortality<br>All-causes (ICD9 <800)<br>≥ 35 years                | 2.09% (0.96, 3.24%)<br>per 10 µg/m <sup>3</sup> NO <sub>2</sub><br>Lag 0-5<br>24 hour average  | 1.95% (0.50, 3.43%)<br>adjusted for PM <sub>10</sub> | None reported                                                                                      | -                                                                                                      | -                            |

| Author (year)<br>Study location<br>Study period             | Outcome<br>Diagnosis<br>Age group                                          | NO <sub>2</sub> effect estimate<br>(95% confidence interval)                                      |                                                      | Correlation<br>NO <sub>2</sub> /PM             | PM effect estimate<br>(95% confidence interval)                                                       |                                         |
|-------------------------------------------------------------|----------------------------------------------------------------------------|---------------------------------------------------------------------------------------------------|------------------------------------------------------|------------------------------------------------|-------------------------------------------------------------------------------------------------------|-----------------------------------------|
|                                                             |                                                                            | Single-pollutant                                                                                  | Adjusted for PM                                      |                                                | Single-pollutant                                                                                      | Adjusted for NO <sub>2</sub>            |
|                                                             | Mortality<br>Cardiac (ICD9 390-429)<br>≥ 35 years                          | 2.63% (1.53, 3.75)                                                                                | 2.58% (1.05, 4.13)<br>adjusted for PM <sub>10</sub>  |                                                | -                                                                                                     | -                                       |
|                                                             | Mortality<br>All respiratory (ICD9<br>460-519)<br>≥ 35 years               | 3.48% (0.75, 6.29)                                                                                | 3.39% (0.77, 6.08)<br>adjusted for PM <sub>10</sub>  |                                                | -                                                                                                     | -                                       |
|                                                             | Mortality<br>Cerebrovascular (ICD9<br>430-438)<br>≥ 35 years               | 2.35% (-0.13, 4.89)                                                                               | 2.55% (-0.71, 5.92)<br>adjusted for PM <sub>10</sub> |                                                | -                                                                                                     | -                                       |
| <b>Faustini et al (2013)</b><br>6 Italian cities<br>2001-05 | Hospital Admissions<br>All respiratory<br>≥ 35 years                       | 1.19% (0.23–2.15)<br>per 10 µg/m <sup>3</sup> NO <sub>2</sub><br>Lag 0-5<br>24 hour average       | 0.86% (0.30–2.02)<br>adjusted for PM <sub>10</sub>   | NO <sub>2</sub> /PM <sub>10</sub><br>0.22-0.79 | 0.59% (0.10–1.08) per<br>10 µg/m <sup>3</sup> PM <sub>10</sub><br>Lag 0-1<br>24 hour average          | 0.45% (-0.12–1.01)                      |
|                                                             | Hospital Admissions<br>COPD<br>≥ 35 years                                  | 1.20% (0.17–2.23)                                                                                 | 1.02% (-0.45–2.51)<br>adjusted for PM <sub>10</sub>  |                                                | 0.67% (-0.02–1.35)                                                                                    | 0.54% (-0.41–1.49)                      |
|                                                             | Hospital Admissions<br>Lower respiratory tract<br>infections<br>≥ 35 years | 1.79% (-1.16–4.83)                                                                                | 2.01% (-1.78–5.94)<br>adjusted for PM <sub>10</sub>  |                                                | 1.91% (0.06–3.79)                                                                                     | 2.14% (-0.74–5.11)                      |
| <b>Guo et al (2014)</b><br>Shanghai<br>2004-08              | Mortality<br>All-causes<br>All ages                                        | 1.6% (0.4 to 2.8)<br>per 30 µg/m <sup>3</sup> (IQR)<br>NO <sub>2</sub> Lag 0-1<br>24 hour average | 1.6% (-0.2 to 3.5)<br>adjusted for PM <sub>2.5</sub> | NO <sub>2</sub> /PM <sub>2.5</sub><br>0.61     | 1.3% (0.1 to 2.6) per<br>94 µg/m <sup>3</sup> (IQR) PM <sub>2.5</sub> ,<br>Lag 0-1<br>24 hour average | 0.3% (-1.4 to 2.0)<br>PM <sub>2.5</sub> |
|                                                             |                                                                            |                                                                                                   | 0.5% (-1.3 to 2.3)<br>adjusted for PM <sub>10</sub>  | NO <sub>2</sub> /PM <sub>10</sub><br>0.67      | 1.7% (0.6 to 2.9) per<br>106 µg/m <sup>3</sup> (IQR) PM <sub>10</sub>                                 | 1.3% (-0.4 to 3.0)<br>PM <sub>10</sub>  |
| <b>HEI (2012)</b><br>Ho Chi Minh city, Vietnam              | Hospital admissions<br>Acute lower respiratory                             | 4.32% (0.04, 8.79)<br>per 10 µg/m <sup>3</sup> NO <sub>2</sub>                                    | 4.81% (0.04, 9.80)<br>adjusted for PM <sub>10</sub>  | NO <sub>2</sub> /PM <sub>10</sub><br>0.78      | 0.26% (-0.94, 1.47)<br>per 10 µg/m <sup>3</sup> PM <sub>10</sub>                                      | -0.31% (-1.65, 1.04)                    |

| Author (year)<br>Study location<br>Study period                          | Outcome<br>Diagnosis<br>Age group                                   | NO <sub>2</sub> effect estimate<br>(95% confidence interval)                                             |                                                             | Correlation<br>NO <sub>2</sub> /PM             | PM effect estimate<br>(95% confidence interval)                                                      |                                          |
|--------------------------------------------------------------------------|---------------------------------------------------------------------|----------------------------------------------------------------------------------------------------------|-------------------------------------------------------------|------------------------------------------------|------------------------------------------------------------------------------------------------------|------------------------------------------|
|                                                                          |                                                                     | Single-pollutant                                                                                         | Adjusted for PM                                             |                                                | Single-pollutant                                                                                     | Adjusted for NO <sub>2</sub>             |
| 2003-05                                                                  | infections<br>Children <5 years                                     | Lag 1-6<br>24 hour average                                                                               |                                                             |                                                | Lag 1-6<br>24 hour average                                                                           |                                          |
| <b>Iskandar et al (2012)</b><br>Copenhagen<br>2001-08                    | Hospital admissions<br>Asthma (ICD10 J45-46)<br>Children 0-18 years | OR 1.10 (1.04 to 1.16)<br>per 6.53 ppb (IQR)<br>NO <sub>2</sub> Lag 0-4<br>24 hour average               | OR 1.08 (1.01 to 1.15) adjusted for PM <sub>10</sub>        | NO <sub>2</sub> /PM <sub>10</sub><br>0.43      | OR 1.07 (1.03 to 1.12)<br>per 13.4 µg/m <sup>3</sup> (IQR)<br>PM <sub>10</sub> Lag 0-4               | OR 1.04 (1.00 to 1.09)                   |
|                                                                          |                                                                     |                                                                                                          | OR 1.12 (1.05 to 1.19)<br>adjusted for PM <sub>2.5</sub>    | NO <sub>2</sub> /PM <sub>2.5</sub><br>0.33     | OR 1.09 (1.04 to 1.13)<br>per 4.8 µg/m <sup>3</sup> (IQR)<br>PM <sub>2.5</sub> Lag 0-4               | OR 1.06 (1.02 to 1.11)                   |
|                                                                          |                                                                     |                                                                                                          | OR 1.13 (1.05 to 1.22)<br>adjusted for ultrafine particles  | NO <sub>2</sub> /ultrafine particles<br>0.51   | OR 1.06 (0.98 to 1.14)<br>per 3812.86 particles/cm <sup>3</sup> (IQR)<br>ultrafine particles Lag 0-4 | OR 0.97 (0.89 to 1.06)                   |
| <b>Moolgavkar et al (2013)</b><br>108 metropolitan US areas<br>1987-2000 | Mortality<br>All-cause<br>All ages                                  | 1.03% (0.91, 1.18)<br>per 10 ppb NO <sub>2</sub><br>Lag 1<br>24 hour average                             | 0.94% (0.60, 1.26)<br>Based on 72 cities                    | None reported                                  | 0.40% (0.30, 0.53) per<br>10 µg/m <sup>3</sup> PM <sub>10</sub><br>Lag 1<br>24 hour average          | 0.20% (0.03, 0.36)<br>Based on 72 cities |
| <b>Nuvolone et al (2013)</b><br>6 urban areas in Tuscany<br>2002-05      | Hospital admissions<br>Myocardial infarction<br>(ICD9 410)          | OR 1.022 (1.004, 1.041) per 10 µg/m <sup>3</sup><br>NO <sub>2</sub> Lag 2<br>24 hour average             | OR 1.025 (0.999, 1.053)<br>adjusted for PM <sub>10</sub>    | NO <sub>2</sub> /PM <sub>10</sub><br>0.44-0.71 | OR 1.013 (1.000, 1.026) per 10 µg/m <sup>3</sup><br>PM <sub>10</sub> Lag 2<br>24 hour average        | OR 1.001 (0.980, 1.021)                  |
| <b>Zhang et al (2011)</b><br>Beijing<br>2003-08                          | Mortality<br>All cardiovascular (I90-99)<br>All ages                | RR 1.00271<br>(1.00086, 1.00457)<br>per 10 µg/m <sup>3</sup> NO <sub>2</sub><br>Lag 0<br>24 hour average | RR 0.99866 (0.99765, 0.99967) adjusted for PM <sub>10</sub> | NO <sub>2</sub> /PM <sub>10</sub><br>0.615     | RR 1.00164 (1.00144, 1.00184) per 10 µg/m <sup>3</sup> PM <sub>10</sub> Lag 0<br>24 hour average     | RR 1.00181<br>(1.00157, 1.00205)         |
|                                                                          | Mortality<br>All respiratory (J00-98)<br>All ages                   | RR 1.00947<br>(1.00759, 1.01135)<br>per 10 µg/m <sup>3</sup> NO <sub>2</sub>                             | RR 1.01005 (1.00782, 1.01228) adjusted for PM <sub>10</sub> |                                                | RR 1.00101 (1.00057, 1.00145) per 10 µg/m <sup>3</sup> PM <sub>10</sub> Lag 0                        | RR 0.99974<br>(0.99922, 1.00027)         |

| Author (year)<br>Study location<br>Study period | Outcome<br>Diagnosis<br>Age group | NO <sub>2</sub> effect estimate<br>(95% confidence interval) |                          | Correlation<br>NO <sub>2</sub> /PM | PM effect estimate<br>(95% confidence interval) |                              |
|-------------------------------------------------|-----------------------------------|--------------------------------------------------------------|--------------------------|------------------------------------|-------------------------------------------------|------------------------------|
|                                                 |                                   | Single-pollutant                                             | Adjusted for PM          |                                    | Single-pollutant                                | Adjusted for NO <sub>2</sub> |
|                                                 |                                   |                                                              | Lag 0<br>24 hour average |                                    |                                                 |                              |

## References

- Bhaskaran K, Hajat S, Armstrong B, Haines A, Herrett E, Wilkinson P, Smeeth L. (2011) The effects of hourly differences in air pollution on the risk of myocardial infarction: case crossover analysis of the MINAP database. *BMJ*. 343:d5531. doi: 10.1136/bmj.d5531.
- Chen R, Samoli E, Wong CM, Huang W, Wang Z, Chen B, Kan H; CAPES Collaborative Group. (2012) Associations between short-term exposure to nitrogen dioxide and mortality in 17 Chinese cities: the China Air Pollution and Health Effects Study (CAPES). *Environ Int*. 45:32-8. doi:10.1016/j.envint.2012.04.008.
- Chen R, Zhang Y, Yang C, Zhao Z, Xu X, Kan H. (2013a) Acute effect of ambient air pollution on stroke mortality in the China air pollution and health effects study. *Stroke*. 44(4):954-60. doi: 10.1161/STROKEAHA.111.673442.
- Chen R, Wang X, Meng X, Hua J, Zhou Z, Chen B, Kan H. (2013b) Communicating air pollution-related health risks to the public: an application of the Air Quality Health Index in Shanghai, China. *Environ Int*. 168-73. doi: 10.1016/j.envint.2012.11.008.
- Chiusolo M, Cadum E, Stafoggia M, Galassi C, Berti G, Faustini A, Bisanti L, Vigotti MA, Dessì MP, Cernigliaro A, Mallone S, Pacelli B, Minerba S, Simonato L, Forastiere F; EpiAir Collaborative Group. (2011) Short-Term Effects of Nitrogen Dioxide on Mortality and Susceptibility Factors in 10 Italian Cities: The EpiAir Study. *Environ Health Perspect*. 119(9):1233-8. doi: 10.1289/ehp.1002904.
- Faustini A, Stafoggia M, Colais P, Berti G, Bisanti L, Cadum E, Cernigliaro A, Mallone S, Scarnato C, Forastiere F; EpiAir Collaborative Group. (2013) Air pollution and multiple acute respiratory outcomes. *Eur Respir J*. 42(2):304-13. doi: 10.1183/09031936.00128712.
- Guo Y, Li S, Tian Z, Pan X, Zhang J, Williams G.(2013) The burden of air pollution on years of life lost in Beijing, China, 2004-08: retrospective regression analysis of daily deaths. *BMJ*. 347: f7139. doi: 10.1136/bmj.f7139.
- HEI Collaborative Working Group on Air Pollution, Poverty, and Health in Ho Chi Minh City<sup>1</sup>, Le TG, Ngo L, Mehta S, Do VD, Thach TQ, Vu XD, Nguyen DT, Cohen A. (2012) Effects of short-term exposure to air pollution on hospital admissions of young children for acute lower respiratory infections in Ho Chi Minh City, Vietnam. *Res Rep Health Eff Inst*. (169):5-72
- Iskandar A, Andersen ZJ, Bønnelykke K, Ellermann T, Andersen KK, Bisgaard H. (2012) Coarse and fine particles but not ultrafine particles in urban air trigger hospital admission for asthma in children. *Thorax*. 67(3):252-7. doi: 10.1136/thoraxjnl-2011-200324.
- Moolgavkar SH<sup>1</sup>, McClellan RO, Dewanji A, Turim J, Luebeck EG, Edwards M. (2013) Time-series analyses of air pollution and mortality in the United States: a subsampling approach. *Environ Health Perspect*. 121(1):73-8. doi: 10.1289/ehp.1104507.

Nuvolone D, Balzi D, Chini M, Scala D, Giovannini F, Barchielli A. (2011) Short-term association between ambient air pollution and risk of hospitalization for acute myocardial infarction: results of the cardiovascular risk and air pollution in Tuscany (RISCAT) study. *Am J Epidemiol.* 174(1):63-71. doi: 10.1093/aje/kwr046.

Zhang F, Li L, Krafft T, Lv J, Wang W, Pei D. (2011) Study on the association between ambient air pollution and daily cardiovascular and respiratory mortality in an urban district of Beijing. *Int J Environ Res Public Health.* 8(6):2109-23. doi: 10.3390/ijerph8062109.
